# Supplementary material for: Recent spread of Varroa destructor virus-1, a honey bee pathogen, in the United States
Source: PubMed Central journal article supplement (PMC5727227; doi:10.1038/s41598-017-17802-3), 2017-12-12
Supplement: 41598_2017_17802_MOESM1_ESM.pdf [file 41598_2017_17802_MOESM1_ESM.pdf]

## Supplementary Information

### Recent spread of *Varroa destructor* virus-1, a honey bee pathogen, in the United States.

#### **Authors:**

Eugene V. Ryabov<sup>1\*</sup>, Anna K. Childers<sup>1</sup>, Yanping Chen<sup>1</sup>, Shayne Madella<sup>1</sup>, Ashrafun Nessa<sup>2</sup>, Dennis vanEngelsdorp<sup>2</sup>, Jay D. Evans<sup>1\*</sup>

#### **Affiliations:**

<sup>1</sup>US Department of Agriculture, Agricultural Research Service, Bee Research Lab, Beltsville, MD, USA

<sup>2</sup>University of Maryland, Department of Entomology, College Park, MD, USA

#### **This PDF file includes:**

##### **Supplementary information**

**Supplementary Table 1.** Summary of the NGS libraries for the honey bee pupae infected with VDV1.

**Supplementary Table 2.** Primers used in this study.

**Supplementary Figure S1.** DWV-like NGS read coverage and Shannon's diversity index for VDV1 positive NGS libraries.

**Supplementary Figure S2.** Average load and prevalence of honeybee viruses.

**Supplementary Figure S3.** Mutual influence of DWV and VDV1, contingency table analysis.

**Supplementary Figure S4.** Detection of VDV1-DWV recombination products in the NGS library from a single pupa (Pupa-MD-12).

**Supplementary Data S1.** Full-length VDV1-USA and DWV consensus sequences generated using NGS data.

**Supplementary Data S2.** DWV, VDV1 and VDV-1-DWV recombinant sequences generated by RT-PCR.

**Supplementary Table 1.** Summary of the NGS libraries for the honey bee pupae infected with VDV1. Shown are the total number of reads in the library, DWV-type reads, VDV1-type reads, their

proportions and combined DWV and VDV1 coverage normalised to the coverage of the honeybee RPS5 and actin mRNAs.

| NGS library   | Sample description                      | Total reads | Total DWV reads<br>(aligned to<br>GenBank<br>Accession number<br>GU109335) | Total VDV1 reads<br>(aligned to<br>GenBank<br>Accession number<br>AY251269) | DWV<br>reads (%) | VDV1<br>reads (%) | DWV and<br>VDV1 to<br>RPS5 mRNA<br>(GB45730)<br>coverage ratio | DWV and<br>VDV1 to actin<br>mRNA<br>(B44311)<br>coverage ratio |
|---------------|-----------------------------------------|-------------|----------------------------------------------------------------------------|-----------------------------------------------------------------------------|------------------|-------------------|----------------------------------------------------------------|----------------------------------------------------------------|
| Pupa_No_2_MD  | Individual pupa, Maryland, October 2015 | 14918458    | 845852                                                                     | 65458                                                                       | 5.67%            | 0.44%             | 5.48                                                           | 8.15                                                           |
| Pupa_No_7_MD  | Individual pupa, Maryland, October 2015 | 12314066    | 227910                                                                     | 24312                                                                       | 1.85%            | 0.20%             | 1.70                                                           | 2.45                                                           |
| Pupa_No_12_MD | Individual pupa, Maryland, October 2015 | 15250702    | 4955503                                                                    | 8543796                                                                     | 32.49%           | 56.02%            | 1232.40                                                        | 1532.29                                                        |
| Pupa_No_22_FL | Individual pupa, Florida, January 2017  | 20781666    | 5519537                                                                    | 2697953                                                                     | 26.56%           | 12.98%            | 185.69                                                         | 97.45                                                          |

**Supplementary Table 2.** Primers used in this study.

| Primer ID          | Nucleotide sequence (5' to 3')                                                                         | Target (postions in the nucleotide sequence), polarity, GenBank accession number | Applications                                       |
|--------------------|--------------------------------------------------------------------------------------------------------|----------------------------------------------------------------------------------|----------------------------------------------------|
| VDV1-CP-1650-For   | CGGAAACAAGTTCGGCTTC                                                                                    | VDV1 (1646 -1664), Forward, AY251269                                             | RT-PCR, VDV1 fragment CP                           |
| VDV1-CP-2850-Rev   | CTCAATTTTCTGTTCAACG                                                                                    | VDV1 (2836 - 2854), Reverse, AY251269                                            | RT-PCR, VDV1 fragment CP                           |
| VDV1-Centr-4.8-F   | CTGTAGTTAAGCGGTTATTAGAA                                                                                | VDV1 (4890 - 4912), Forward, AY251269                                            | RT-PCR, VDV1 and VDV1-DWV recombinants fragments C |
| VDV1-Centr-6.3-R   | CTGAAGTACTAATCTCTGAG                                                                                   | VDV1 (6298 - 6317), Reverse, AY251269                                            | RT-PCR, VDV1 fragment C                            |
| DWV-Centr-4.9-F    | ACTGTAGTCAAGCGGTTACTTGAG                                                                               | DWV (4911 - 4934), Forward, AY292384                                             | RT-PCR, DWV fragment C                             |
| DWV-Centr-6.5-R    | CTTGAGCTTGAGGCTCTGCA                                                                                   | DWV (6521 - 6541), Reverse, AY292384                                             | RT-PCR, DWV and VDV1-DWV recombinants fragments C  |
| VDV1-POL-8910-For  | GCGTCGTACCGTCCGCTA                                                                                     | VDV1 (8912 - 8930), Forward, AY251269                                            | RT-PCR, VDV1 fragment POL                          |
| VDV1-POL-10060-Rev | GACGCATTGCCGTTATGC                                                                                     | VDV1 (10065 - 10082), Reverse, AY251269                                          | RT-PCR, VDV1 fragment POL                          |
| qVDV1-CP-F         | CTGTAGTTAAGCGGTTATTAGAA                                                                                | VDV1 (4890 - 4912), Forward, AY251269                                            | qRT-PCR-VDV1                                       |
| qVDV1-CP-R         | GGTGCTTCTGGAATAGCGGAA                                                                                  | VDV1 (4966 - 4986), Reverse, AY251269                                            | qRT-PCR-VDV1                                       |
| VDV1-CP-CONTROL    | CTGTAGTTAAGCGGTTATTAGAAAAATCACTT<br>GGCGACGCAACCCAGGAATCCGCCAATTCAGG<br>TACGGTTATTTCCGCTATTCCAGAAGCACC | VDV1 (4890 - 4986), Forward, AY251269                                            | VDV1-CP Standard                                   |
| DWV-F8668          | TTCATTAAGCCACCTGGAACATC                                                                                | DWV (8645 - 8668), Forward, AY292384                                             | qRT-PCR-DWV                                        |
| DWV-B8757          | TTTCTCATTAACTGTGTCGTTGA                                                                                | DWV ( 8780 - 8757) Reverse, AY292384                                             | qRT-PCR-DWV                                        |
| ABPV-F6548         | TCATACCTGCCGATCAAG                                                                                     | ABPV (6531 - 6548), Forward, AF150629                                            | qRT-PCR-ABPV                                       |
| KIABPV-B6707       | CTGAATAACTGTGCGTATC                                                                                    | ABPV (6727 - 6707), Reverse, AF150629<br>IAPV, (6812 - 6792), Reverse, KY243933  | qRT-PCR-ABPV<br>qRT-PCR-IAPV                       |
| IAPV-F6627         | CCATGCCTGGCGATTAC                                                                                      | IAPV, (6610 - 6627), Forward, KY243933                                           | qRT-PCR-IAPV                                       |
| CBPV1-qF1818       | CAACCTGCCTCAACACAG                                                                                     | CBPV, (1790 - 1807), Forward, KY937971                                           | qRT-PCR-CBPV                                       |
| CBPV1-qB2077       | AATCTGGCAAGGTTGACTGG                                                                                   | CBPV, (2085 - 2066), Reverse, KY937971                                           | qRT-PCR-CBPV                                       |
| KBV.F              | TGAACGTCGACCTATTGAAAAA                                                                                 | KBV, (5408 - 5429), Forward, AY275710                                            | qRT-PCR-KBV                                        |
| KBV.R              | TCGATTTTCCATCAAATGAGC                                                                                  | KBV, ( 5534 - 5514), Reverse, AY275710                                           | qRT-PCR-KBV                                        |
| qLSV2-F1722        | CGTGCTGAGGCCACGTTGT                                                                                    | LSV2, (1776 - 1795), Forward, HQ888865                                           | qRT-PCR-LSV2                                       |
| qLSV2-R1947        | GCGGTGTCGATCTCGCGGAC                                                                                   | LSV2, (2000 - 1982), Reverse, HQ888865                                           | qRT-PCR-LSV2                                       |
| RP49-qF            | AAGTTCATTCGTACCAGAG                                                                                    | Honeybee RP49 mRNA, (206 - 225),<br>Forward, XM_016914656                        | qRT-PCR-RP49                                       |
| RP49-qB            | CTCCAGTTCCTTGACATTATG                                                                                  | Honeybee RP49 mRNA, (410 - 389), Reverse,<br>XM_016914656                        | qRT-PCR-RP49                                       |

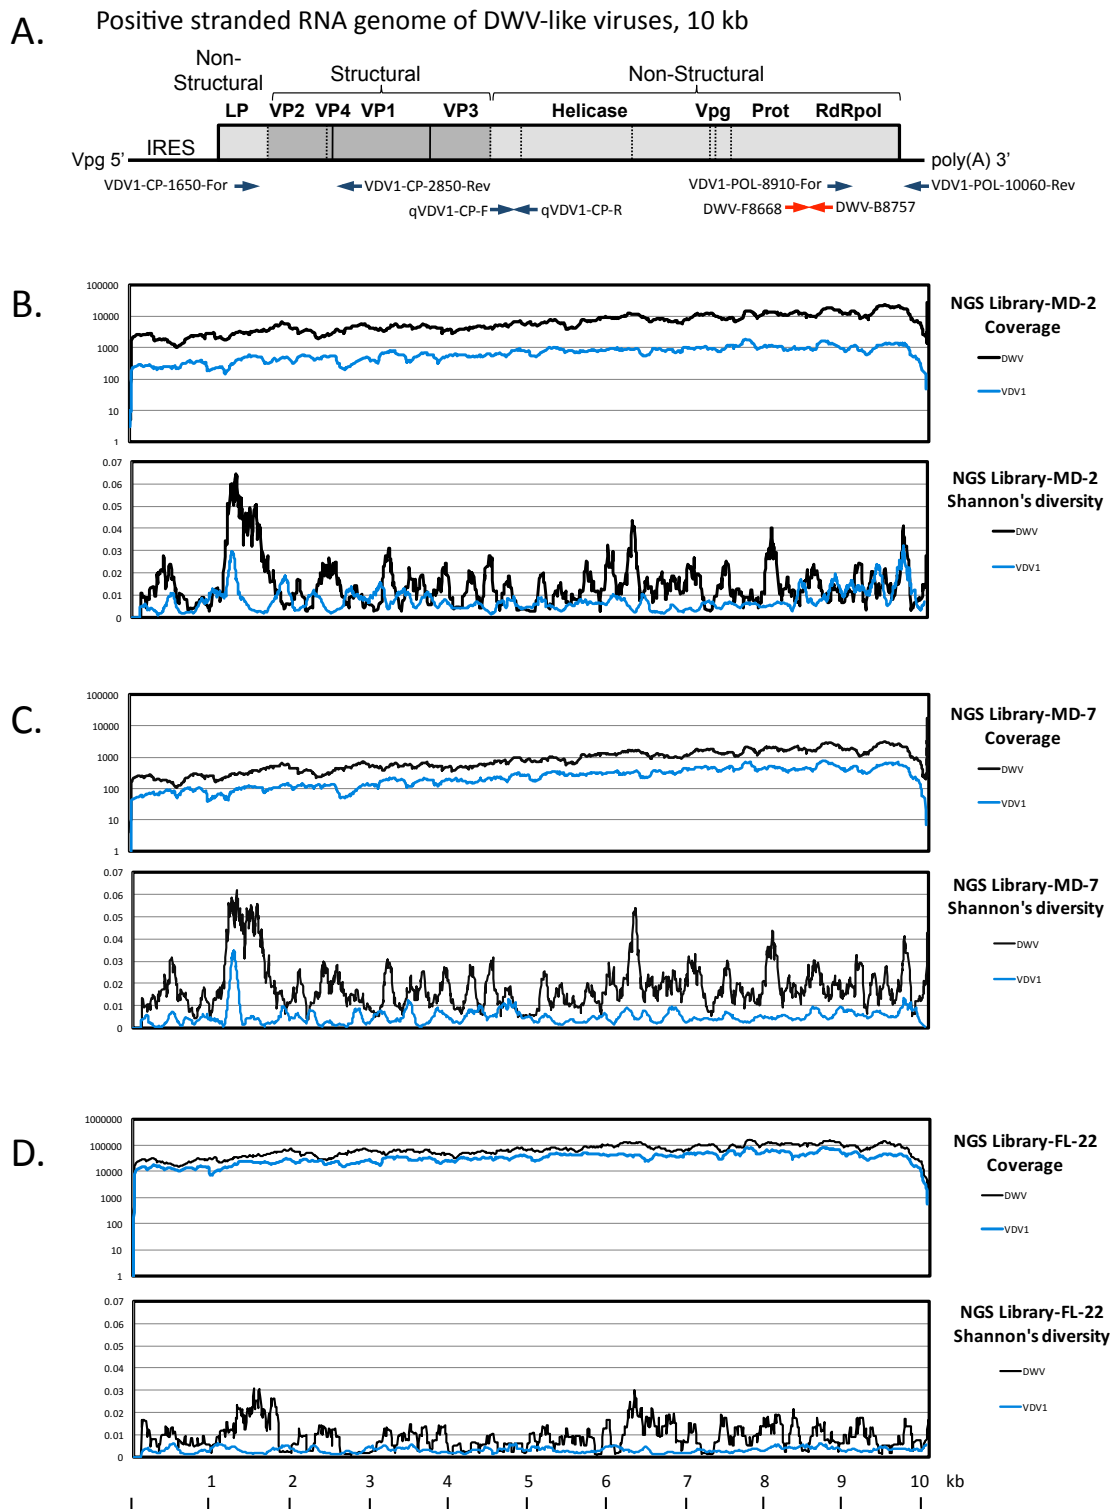

**Supplementary Figure S1.** DWV-like NGS read coverage and Shannon's diversity index for VDV1 positive NGS libraries. (A) Genome organization of DWV and VDV1 with positions of the primers used for RT-PCR amplification of VDV-1 and qRT-PCR quantification of DWV and VDV1. (B-D) NGS read coverage and Shannon's diversity index profiles (100 nt window average) for DWV and VDV1 in individual honey bee pupae for three NGS libraries. Data for Pupa-No-2-MD shown in Fig. 1.

Apiaries sampled across the US, n=603, 50 pooled adult worker bees per sample

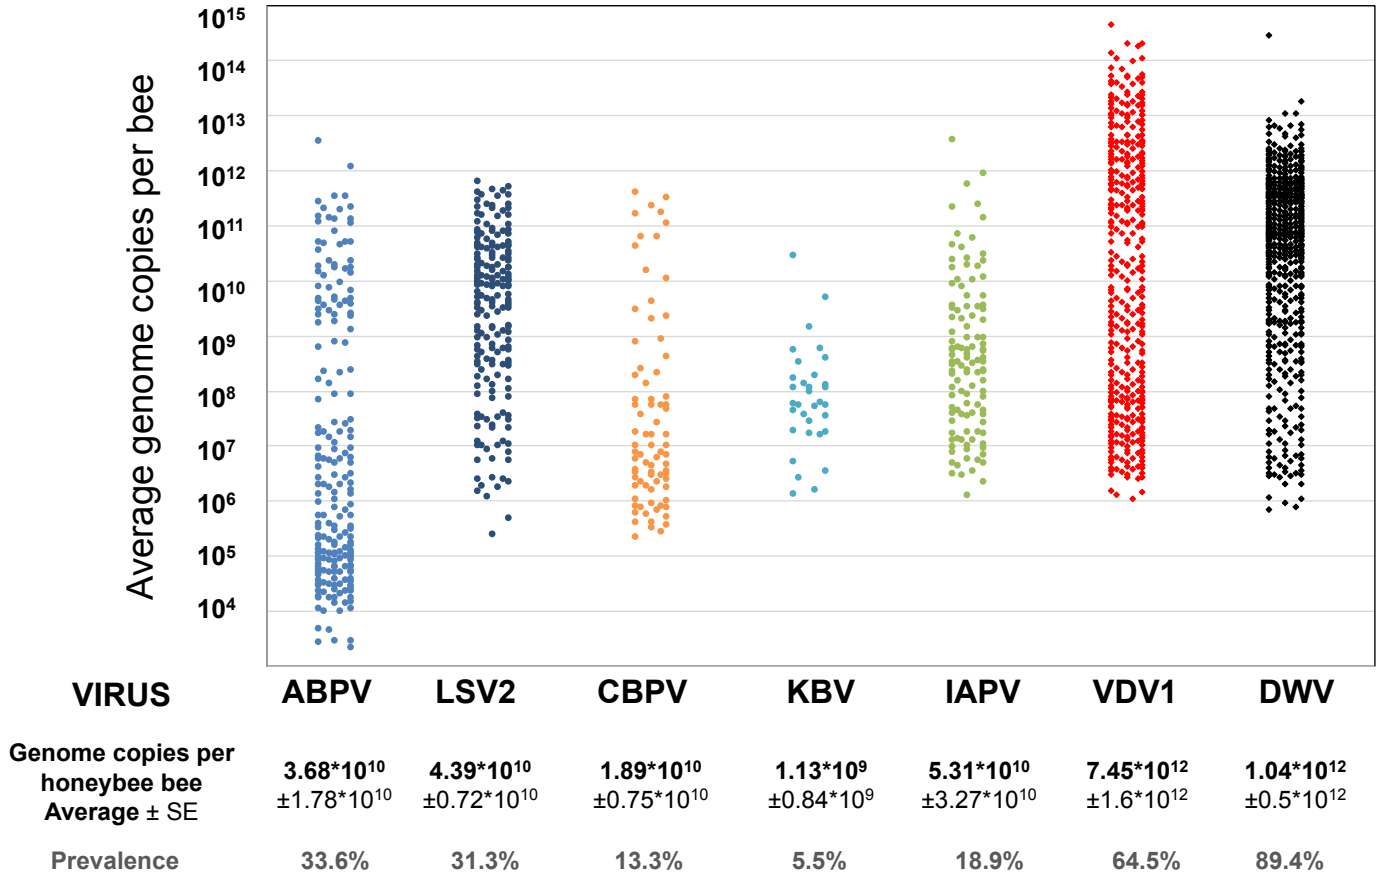

**Supplementary Figure S2.** Average load and prevalence of honeybee viruses.

Contingency table analysis,  $P < 0.0001$

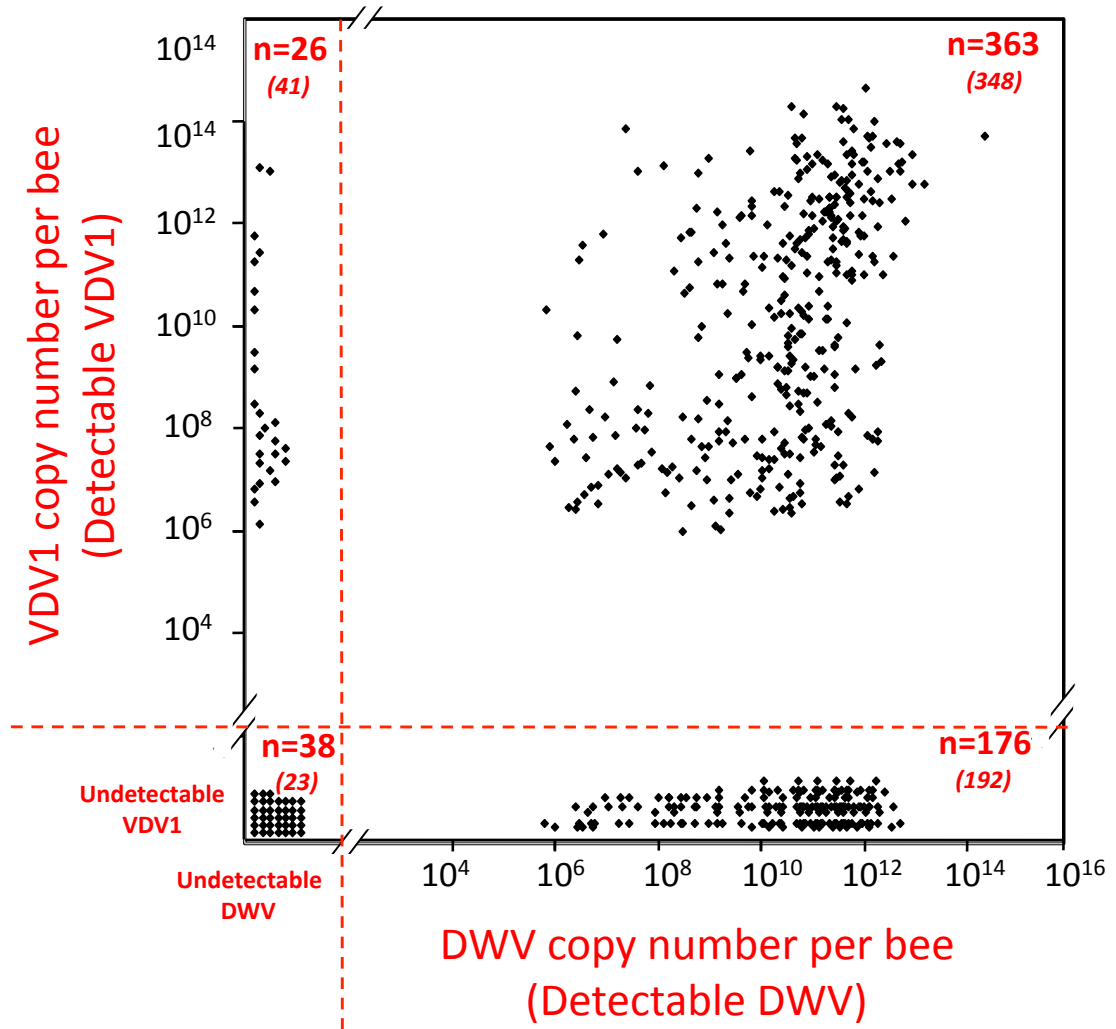

**Supplementary Figure S3.** Mutual influence of DWV and VDV1, contingency table analysis. The honey bee colonies with detectable VDV1 and undetectable DWV are significantly under-represented ( $P < 0.0001$ ). Expected frequencies are shown in italics in brackets below the observed.

Positive-stranded RNA genome of DWV-like viruses, 10 kb

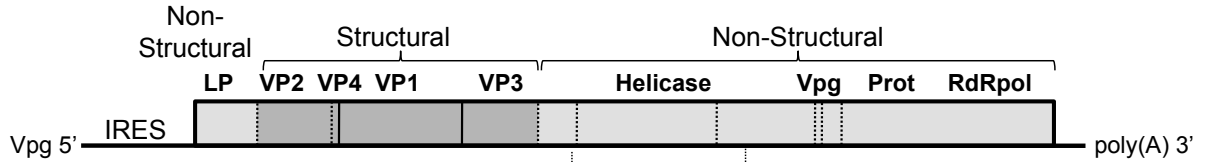

RT-PCR amplification of recombinants  
VDV1-Centr-4.8-F + DWV-Centr-6.5-R

Rec-VDV1-DWV-fragm-C

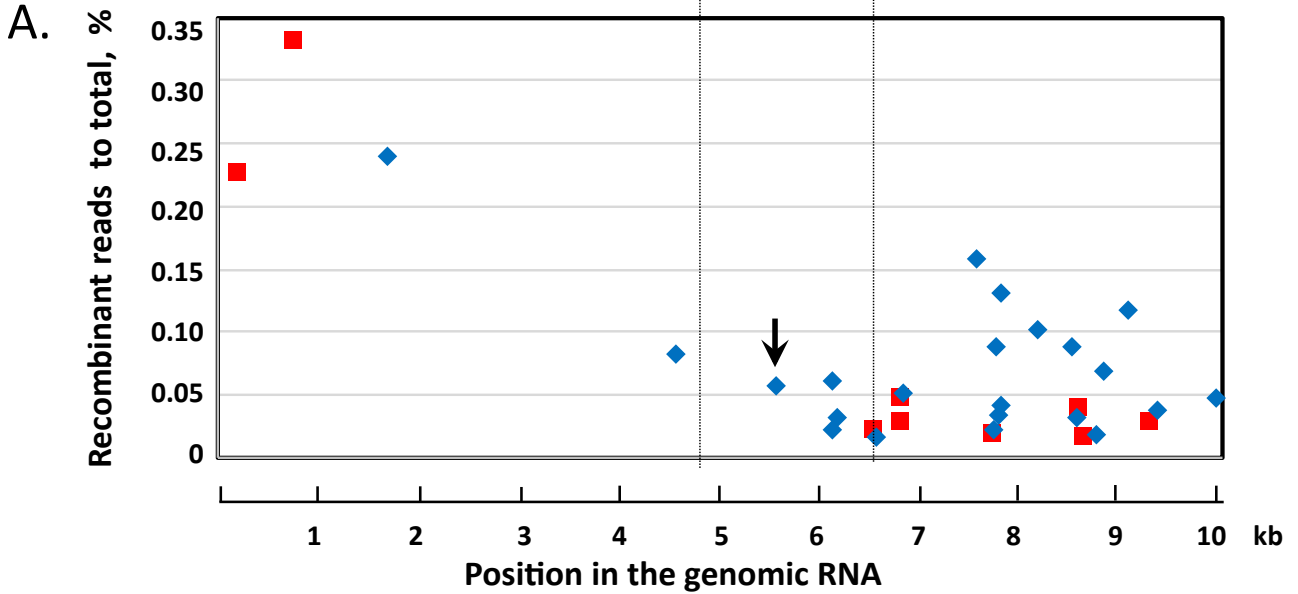

**B.**

|                |      |                                                                                             |
|----------------|------|---------------------------------------------------------------------------------------------|
| VDV1-MD-12     | 5438 | AATTTAGTGTGTTTACGAGTGTGTATGATCAAATCTCTAAATTGAAGACGGATCTATGGAAATGGGATCGAAATCCATATATAGGCCGGA  |
| DWV-MD-12      | 5451 | AATTTGAGTGTGTTTACACGTGTGTATGATCAAATCTCTAAATTGAAGACTGATCTATGGAAATGGGATCGAAATCCATATATAGGCCGGA |
| RecMD12-RT-PCR | 456  | AATTTAGTGTGTTTACGAGTGTGTATGATCAAATCTCTAAATTGAAGACTGATCTATGGAAATGGGATCGAAATCCATATATAGGCCGGA  |

  

|                |                                                                               |      |
|----------------|-------------------------------------------------------------------------------|------|
| VDV1-MD-12     | TGTTTTACGATATGATGTGTGGTGCATCTGGAATTGGAATACTATATTGACCGATTCTTTATGCAGCGAGCTCTTAC | 5609 |
| DWV-MD-12      | TGTTTTACGATATGATGTGTGGTGCATCTGGAATTGGAATACTATATTGACCGATTCTTTATGCAGCGAGCTCTTAC | 5622 |
| RecMD12-RT-PCR | TGTTTTACGATATGATGTGTGGTGCATCTGGAATTGGAATACTATATTGACCGATTCTTTATGCAGCGAGCTCTTAC | 627  |

**Supplementary Figure S4.** Detection of VDV1-DWV recombination products in the NGS library from a single pupa (Pupa-MD-12). (A) Identification of the recombination sites using the LUMPY package. The sites are shown along the viral genome map, X-axis. The

recombination points are indicated as red squares for the DWV to VDV1 sites, and as blue diamonds for the VDV1 to DWV sites. The percentage of the NGS reads supporting recombination to total NGS depth of coverage is shown on the Y-axis. Only recombination points with more than 10 supporting events (split or discordant NGS reads) are reported. The black arrow indicates position of the recombination point possibly corresponding to that identified in the RT-PCR product amplified using VDV1 and DWV-specific primers. (B) The recombinant VDV1-DWV reads aligned to the Rec-MD-12-RT-PCR reference sequence (Supplementary Data S2, "Rec-VDV1-DWV-USA-MD-12-fragm-C") and VDV1 and DWV sequences from the pupae MD-12 (Supplementary Data S1, "VDV1-USA-MD-12-cons" and "DWV-USA-MD-12-cons"). The VDV1- and DWV-type divergent positions are highlighted with black and shown in red bold, respectively.



**Supplementary Data S1.** Full-length VDV1-USA and DWV consensus sequences generated using NGS data.

**>VDV1-USA-MD-2-cons**

GGCGATTTATGCCTTCCATAGCGAATTACGGTGCAACTAACAAATTTTAGATAGTAGCCATGAACAAACATTATGAT  
TACTCACTACGTATTGATCATTTTTTACAATGACTTGCGTAGCATGAAGCGCATGCTTGTAGTTATAACTATGTTAT  
TTTGCAAGTTGGAGATAATTGTATTGGATTATGGATGCGTGCACTAAGTGTCTACATCTATAGTCGTTTTGTGGTTC  
AAGTTTTTGTGTTAGTAGTACAATTTTGAAGAATGTAAGTATCGTATGAATGATATTTGAATGACAACACTGAAGT  
ATAAAATATATAAAATCCAAAATATTTTAAATTTTATTTCAGTGTAGTGTTTAATAGAGTAGAATGCCATGTGACC  
GCTCAAAGAAGTCCATTATGGTATATCATTGCAAGTTGAATACTTGTGTATAGTTATTGTATTTTATTAGTAATAT  
TAGTAGTCCGTAACTATCATAATCCTATTATAGTTTGGATTATATGATAGACCCTGCAGTATCGAGTAGAGTTTAG  
AAAGAGTAGTGCAATAGTAAGATCACTGTCACCGACCCTTATTGTAATAGTGAGGTTTGTGCGAAACCAGTTATT  
GTGCAGCGACTAGCAATCGTGAATCAATATAGTTGGTATTCTAAATATGAGACGATTTCGGCGATTTTATTGCGACT  
GAAATTTTCATATTTAGCATGTCAGGTCTTATTATGAATGCTCGAGTATTTATTTCTGCGGTAGAGTAGGGACCCCT  
CTATCTTTCAGGTACTGTATGAGGCGAAAGTGTGAAAGTAATTTATGTCTCTATACATAAGTGACTGTATCGGGAT  
TTCCTTTGGCAAGAATCCTTTTAAATACAGTATAATTTATGCTACGGTACGTTACGTTTCGAGGGCACCCTTAATG  
TCACATAGCCAGACGATGACGAATGGAAAGACATTACTTTTTATTTAATGCTACGATTATTGCTGTTTTATTTT  
GCTGTTTTTATTTGCTATTATATTTTGTCTATTTTATTATTGCTAAAATATATTTCTTTGCTATTTTGTCTTTATATA  
TTAGATTCAATTCTTTTTATTTTATATTTTCAATTTGATTTTCGATTTTGAAGGTAAATATATATAAAAATGGCATT  
TAGTTGTGGAACCTTTCTTATGCTGCTGTTGCTCAAGCTCCCTCTGTAGCTCATGCTCCCCGTAGTTGGGAGATT  
GATGAAGCTAGGCGTCGACGTGTTATTAAGCGTTTGGCGTTGGAACAGGAACGGATTTCGAAACGTTCTTGATGTCA  
CTGTGTATGATCATAACAACGTGGGAGCAAGAGGATGCGCGTGATAATGAGTTCCTTACGGAACAATTGAATAATTT  
ATATACGATATATTCTATAGCTGAAAAGATGTGCCCGCCGCCCTGTTCAAGAACATGTCCCCATTTCAATCAGTAAT  
AGATATTTCCCTTTAGAAATCCCTTAAAGATTGAGGTAGGACAAGATGCGGGTGAGTTCGTATTTAAGAGACCCAAAT  
ATACAAAGATTTGTAAGAAAGTGAACGGGTGGCATCAAAATTTGTGCGCGAGAAAGTTGTTAGGCCCGTTTGTA  
TCGATCGCCCATGTTATTTTAAATTAAGAAAGTAATATATGATTTACATTTGTATCGGTTACGGAACAAGTT  
CGGCTTCTCAGACGCGAAAAACAGCGTGAATATGAGTTAGAGTGTGTTACTAGTTTGTACAGCTATCTAATCCTG  
TTTCAGCTAAACCTGAGATGGACAATCCTAATCCTGGTCCAGATGGTGAAGGTGAAGTTGAATTAGAAAAAGATAG  
TAATGTAGTATTAACACACAACGTGATCCTAGTACCTCTATTCCCTGCTCCAACCTAGTGTGAAGTGGAGTAGGTGG  
ACTAGTAATGATGTTGTGGATGATTATGCCACTATAACTTCGCGTTGGTATCAGATTGCCGAATTTGTATGGTCAA  
AGGATGATCCATTTGATAAGGAATTGGCGCGCTTAATTTTACCTCGAGCTTTGTTATCTAGTATTGAGGCTAATTC  
TGACGCTATTTGTGATGTACCTAATACTATTCCGTTTAAAGGTACATGCATATTGGCGTGGAGATATGGAAGTTCGA  
GTGCAGATTAACCTCGAATAAATTCCAGTTGGTCAATTACAGGCAACTTGGTATTATTCCGGATCATGAAAATTTGA  
ATATTCAGACGAAGCGAAGTGTGTATGTTTTTCGCATATGGATCATGCTTTGATTAGTGCATCAGCGAGTAATGA  
AGCAAATTAGTGATACCTTTTTAAACACGTATATCCATTCTTACCAACGCGCGTCTTCCCTGATTGGACAACCTGGT  
ATTCTTGATATGGGTACCTTAAATATTCGTGTAATTGCTCCATTACGTATGAGTGCACGGGACCAACCACTTGTA  
ATGTTGTAGTATTTATTAAGTTAAATAAGTGAATTCCTGTTACTTCCCTGTTAAGTTTTACGCGAATCAAAT  
CAGGGCAAACCTGAAATGGACCGTGTGTTAAATTTGGCAGAAGGATTATTAATAAATACTGTAGGTGGTTGTAAT  
ATGGATAATCCGTCATATCAGCAATCTCCGCGTCATTTTGTTCCTACTGGTATGCATAGTTTACTTTAGGCACTA  
ATTTAGTAGAGCCTTTGCATGCATTACGATTAGATGCATCAGGTACAACACAACATCCAGTTGGGTGTGCGCCTGA  
TGAAGATATGACTGTATCTTCCATTGCATCAGATATGGTTTAAATTCGCCAAGTGCAATGGAAGAAAGACCATGCG  
AAAGGATCATTATTATTACAACCTTGATGCTGATCCTTTCGTTGAACAGAAAATTGAGGGAACCAATCCAATTTCTT  
TGTATTGGTTTGGCTCCGGTTGGAGTTGTATCTAGTATGTTTATGCAATGGAGAGGTTCTTTAGAATATAGATTTGA  
TATTATAGCTTCCAATTTATACAGGGTAGGTTAATTGTAGGTTATGTTCTTGGACTGACTGCTTCTTTACAACGT  
CAAATGGACTATATGAAATTGAAATCATCTAGTTATGTAGTGTGTTGATTTACAGGAAAGTAATAGTTTTACGTTT  
AAGTGCCTTATGTGTATACAGACCGTGGTGGGTGCGTAAGTATGGTGGTAATTATCTGCCATCCTCTACTGATGC  
GCCTAGCACACTGTTTATGTATGTACAAGTGCCATTGATACCTATGGAAGCTGTTTCTGATACTATAGATATCAAT  
GTGTATGTGCGTGGTGGCAGTTCGTTTGGAGTTTGTGTTCCAGTCCAACCTAGTTTAGGTTTGAACCTGGAATACAG  
ATTTTATATTACGTAATGATGAGGAGTACCGCGCAAAGAATGGATATGCACCATATTTATGCTGGTGTGTGGCATAG  
CTTCAATAATAGTAATTCGCTTATTTTATAGTGGGGTTCGGCTTCAGATCAAATTCGCTCAATGGCCAACAATAACA  
GTGCCTCGAGGAGAGTTGGCATTCTTGCATATCCGCGATGCTAAGCAAGCTGCTGTAGGAACGCAACCTTGGCGTA  
CTATGGTTCGTTTGGCCTCAGGTTCATGGATATAATATTTGGAATACCAACTTATAATGCTGAACGAGCAAGACAAC  
TGCTCAGCATTTGTATGGTGGTGGGCTTTTGGACAGATGAAAAGGCTAAGCAATTTTGTGCTGCTAACCAGCAA  
GGACCCGGCAAAGTAAGTAATGGTAACCCCGTCTGGGAAGTAATGCGCGCGCCTCTTGGCACTCAGCAAGCGCATA  
TACAAGATTTTGAATTTGTTGAAGCTGTTCCAGAAGGCGAAGAATCACGCAACACTACAGTGTAGACACGACAAC  
AACGTTACAGTCTAGCGGATTTGGTTCGTGCTTTCTTTGGTGGGCAATTAACGATCTTAAAGACGTTAATGCGCCGA  
TACCAATTATATGGTCAATTTATTGTTATCCGTTACTACGGATAAGGATATTGATCATTGTATGTTTACCTTCCCTT

GTTTACCTCAAGGGTTAGCGTTAGATATAGGTTCCGGCTGGATCTCCTCATGAAATATTTAATCGCTGCCGTGATGG  
TATCATTCCATTGATAGCGTCAGGGTATCGGTTTTATCGAGGCGACTTACGGTTCAAATTTGTTTTCCCAAGTAAC  
GTTAATAGCAATATTTGGGTACAACATCGACCAGATCGTAGACTGAAAGGATGGTCTGAAGCGAAAATAGTAAACT  
GTGATGCTGTATCTACTGGACAAGGTGTTTATAATCATGGATATGCTAGTCATATTCAGATTACGCGTGTAAATAA  
TGTTATAGAATTGGAAGTCCCGTTTTATAACGCTACGTGCTATAATTTATTTGCAAGCGTTTAAACCCATCTAGTGCA  
GCGTCGAGTTATGCCGTTTCGCTCGGAGAGATTTCCGTTGGTTTTCCAGGCTACTAGTGATGATATTGCAGCCATAG  
TTAATAAACCTGTAACTATATATTACAGTATTGGCGATGGTATGCAGTTTTTCGCAGTGGGTTGGTTATCAACCAAT  
GATGATTCTGGATCAATTGCCAGCACCTGTAGTTAGGGCTGTGCCTGAGGGCCCTATAGCGAAGATAAAGAACTTT  
TTCCACCAAACGGCAGATGAAGTTCGAGAAGCTCAGGCCGCAAAGATGCGTGAAGATATGGGTATAGTAGTCCAAG  
ACGTTATAGGAGAGTTAAGTCAGGCTATACCCGATCTTCAACAACCGGAAGTTCAGCGAATGTTTTTTCCCTTGGT  
GTCACAGTTAGTGCATGCTATTATTGGTACTAGTCTTAAGACAGTTGCTTGGGCGATTGTTTTCGATTTTTGTAACT  
TTAGGTTTTGATTGGACGTGAAATGATGCATTCAGTCATAACTGTAGTTAAGCGGTTATTAGAAAAATATCACTTGG  
CGACGCAACCCAGGAATCCGCCAATTCAGGTACGGTTATTTCCGCTGTTCCAGAAGCACCCAATGCTGAAGCAGA  
GGAGGCCAGTGCCTGGGTATCCATTATTTATAATGGTGTGTGTAATATGTTGAATGTAGCCGCTCAAAAACCGAAA  
CAATTTAAAGATTGGGTAAAATTAGCTACCGTAGATTTTAGTAATAATTGTAGAGGTAGTAATCAGGTATTTGTGT  
TTTTCAAGAATACGTTTTGAAGTGTGGAAGAAAATGTGGGGTTATGTGTTTTGTGTCAGAGTAATCCTGCAGCGGACT  
CTTGAAAGCAGTGAATGATGAACCTGAGATTTTTAAAAGCGTGGGTAAAGAATGTCTGTATTTAGATGATCCTAAA  
TTTAGAATGCGACGTGCACATGATCAAGAGTATATTGAGAGAGTGTGTTGCGGCCCATTCGTATGGACAAATTTTAT  
TGCATGACTTAACGGCTGAAATGAATCAATCGCGTAAATTAAGTGTGTTTACGAGAGTGTATGATCAAATATCTAA  
ATTGAAGACGGATCTCATGGAATGGGATCAAACCCATATATCAGGCGTGAATGTTTTACGATTTGTATGTGTGGT  
GCATCTGGAATTGGTAAAGTCTTATTTAACTGATTCTTTATGCAGCGAGCTCTTACGTGCGAGTCGTACTCCAGTGA  
CAACGGGCATTAAGTGTGTTGTGAACCCTTTGTCTGATTATTGGGATCAGTGTGATTTTTAGCCGTTTTTATGTGT  
TGATGACATGTGGAGTGTGAAACGTCTACTACGCTCGATAAACAGTTAAATATGCTATTTTCAGGTTCCATTCACCA  
ATTGTACTTTCACCTCCTAAAGCTGATTTAGAAGGTAAGAAAATGCGTTATAATCCTGAAATATTCATATATAATA  
CGAATAAACCTTTTTCCGAGGTTTTGATCGTATAGCTATGGAAGCTATTTATCGACGTAGAAACGTTTTTAATTGAATG  
TAAGGCTAATGAAGAGAAGAAGCGTGGATGTAACATTTGTGAGAATAATATACCCATTGCTGAATGTAGTCCAAAA  
ATTTTGAAAGATTTTCATCACATTAATTTTCGTTATGCTCATGATGTGTGCAATTCGAAACTACGTGGTCTGAGT  
GGATGTCGTATAATGAATTTTTGGAATGGATTACTCCTGTATATATGGCTAATCGACGTAAAGCAAATGAATCGTT  
TAAGATGCGTGTGATGAAATGCAATGTTGCGTATAGACGAGCCCTTGGAAAGCGATAATATTTAAATAAGTAT  
GTTGAAGTTAATCAGCGCTTAGTTGAGGAAATGAAAGCTTTTTAAAGAGCGAACCCCTCTGGGCTGATTTACAACGTG  
TTGGCTCAGAGATTAGTACTTCAGTTAAGAAAGCATTACCAACTATTTCCATTACTGAGAAGCTACCACATTGGAC  
CATCCAATGTGGCATAAGCTAAGCCTGAAATGGATCATGCTTATGAAGTTATGAGCTCATATGCAGCAGGAATGAAC  
GCAGAAATTGAAGCGCATGAACAAGTTCGTCGTTCTTCTTTGGAATGTCAGTATGTTGAGCCTTCAACTTCAAGAC  
CTCTGGATGAAGAGGGTCTACTATCGACGAGGAATTACTTGGCGAAGTAGAATTTACTTCTTCAGCTTTGGAGCG  
TTTTGGTTGATGAGGGGTATATTACTGGTAAACAAAAGAAGTACATGGCAACTTGGTGTACGAAACGAAGAGAGCAT  
GTATCTGATTTTTGATTTAGTATGGATGGATAATTTGCGTGTTTTTAAGTGCATGATGTCACGAGCGTTCTACATCTA  
CGCGTTTTGCTACCGATGATGTTAAATTTAAGACGATTAGTATGTTACATCAGAGGTATGATACCCTGATTG  
TGCAAAATGCCAACATTGGTATGCACCATTAACAGCTATTTATGTTGATGATAGAAAGCTGTTTTGGTGCAGAAAG  
GAGACTAAGACTTTGATAGATGTTTCGTAATTTGTCGAAAGAGGACGTTACAGTCCAATCGAAATTAATTAACCTTAT  
CGTTCCGTGCGGTGATGTATGTATATTACATTCTAAGTACTTTAATTTATTTATTTTCATAAAGCGTGGTTGTTTGA  
AAATCCAACATGGCGTTAATATATAACGGTACTAAGAAAGGTATGCCTGAGTATTTTCATGAATGCGTGGATGAA  
ATTTCAATTAGATTCAAAATTTTGTAAGTAAAGGTTTGGCTTCAAGCAATTTATTGATAAATATTTGACTCGTCCAG  
TGAAAATGATTCGTGACTTCTATTTAAATGGTGGCCGCAAGTAGCATACTGTTAAGTTTGTAGGTATAATTGG  
TATAACTGCGTATGAGATGCGTAATCCTAAATCAACAGCAGAAGACTTGGCTGAGCACTATGTTAATAGGCATTGT  
AGTTCAGATTTTTGGTACCAGGTATGGCAACTCCTCAGGGATTAATAATATAGTGAAGCGATAACAGCTAAAGCGC  
CTAGAATTCATAGATTGCCCGTTACTACTAGACCTCAGGGATCAACGCAACAAGTTGACGCCGCTGTGAATAAAAT  
TTTTGCAGAAATATGGTGTATATCGGTGTTGTGTTTTCCAAAAGTGCCTGGTAGTAAGTGGCGAGATATTAATTTTGA  
TGTCTTATGCTTCATAATCGGCAGTGTGTTGATGTTGCGGCATTACATTGAGTCGACGGCTGCTTTTTCCGGAGGGTA  
CCAAATACTATTTTAAAGTATATTTCATAATCAAGAACTCGAATGTCAGGTGATATATCTGGTATTGAGATTGATTT  
ATTGAGTTTACCTAGATTGTATTATGGTGGCTTAGCCGGGGAAGAGTCGTTTCGATAGCAATATAGTGTAGTAACCT  
ATGCCGAATAGAATTCCTGAGTGTAAAGATATTGTGAAGTTTATAGCTTCACATGCTGAACATGCTCGTGTCTCAA  
ATGATGGTGTGTTAGTTACTGGTGAACATACTCAGTTATTGGCGTTTGAAGAATAATAAAAACACCTATAAGTAT  
TAATGCTGATGGTTTTGTATGAGGTTATACTTCAAGGAGTATACACCTATCCATAACCATGGTGTGTTGTTGTGGG  
TCTATATTATTTGCTCGTAATTTACAACGACCGATTATAGGGATCCATGTAGCTGGTACTGAAGGATTACATGGCT  
TTGGTGTGCTGAACCTCTTGTTCATGAGATGTTTCACTGGGAAAGCAATAGAGAGTGAAGGGGAACCGTATGATCG  
TGTGTATGAATTACCTTTGCGTGAATTAGATGAATCTGATATAGGTTTAGATACTGATTTATATCCTATAGGAAGA  
GTCGATGCGAAATTAGCTCATGCCAAAAGTCTTCAACAGGAATTAAAAAGACGCTTATTCATGGTACTTTTTGATG  
TTCGGACTGAACCGAATCCGATGTCATCACGAGACCCAAGAATAGCGCCACATGATCCGTTGAAGTTGGGGTGTGA  
GAAACATGGTATGCCATGTTCTCCATTTAATCGGAAACATTTGGAATTAGCAACAACCTCATTTAAAGGAGAAGTTA

ATTTCCGTAGTTAAACCTATAAATGGATGCAAGATTAGAAGTTTGCAAGATGCTGTATGTGGTGTACCAGGTTTGG  
ATGGCTTTGATTCAATATCCTGGAATACTAGTGTGGTTTTCTTTATCTTCATTAACCCAGGCTCTTCTGG  
TAAGCGATGGTTGTTTGATATTGAATTACAAGATTCAGGATGTTATCTTTTGAGAGGGATGAGACCTGAACTTGAG  
ATACAGTTGACAACAACCTCAGTTAATGAGGAAGAAGGGAATAAAGCCTCACACTATATTCACAGATTGTTTGAAAG  
ATACATGTTTGCCTGTGGAAAAATGCAGAATACCTGGTAAACTAGAATATTTAGTATAAGTCCCGTCCAATTTAC  
GATTCATTTTCGACAATACTATCTCGATTTTATGGCGTCGTACCGTGCCTGCTAGACTTAATGCTGAGCATGGAATA  
GGTATAGACGTGAACAGCTTGGAAATGGACAACTTGGCAACAAGTCTGTGCGAAATATGGCACGCATATTGTGACAG  
GAGATTATAAGAATTTTGGTCCTGGGTAGATTCTGATGTTGCCGCTTCAGCTTTTGAATTTATCATTGATTGGGT  
GTTAAATTACACTGAAGAAGATGATAAAGACGAAATGAAGCGTGAATGTGGACTATGGCTCAGGAAATCTTAGCT  
CCTAGTCACTTATGTCTGATTTAGTATATCGCGTGCCATGCGGTATTCCTTCTGGATCACCGATTACGGACATTT  
TGAATACTATTTTGAATTTGTTTGTAAATTCGATTGGCTTGGCAAGGTATTACTGATTTGCCTTTATCCGAATTTT  
TAGACATGTCGTGCTAGTTTGTACGGTGATGATCTCATCATGAATGTAAGTGATGAGATGATAGATAAATTCAT  
GCTGTAACAATTTGGCGATTTCTTTTTCGCGATATAAGATGGAATTTACGGATCAGGATAAGTCTGGAATACAGTGC  
GGTGGCGAACTTTACAACTGCTACGTTTTTGAAGCATGGGTTCTTGAACATCCAACAAGACCCGTGTTTCTAGC  
CAATCTGGATAAGGTTTCTATAGAAGGAACAACCAATTTGGACACATGCTCGAGGATTGGGTGCTCGAGTAGCAACC  
ATTGAGAATGCTAAACAAGCGCTAGAGTTGGCATTTCGGATGGGGTCCCGAATACTTCAATCATGTTCCGAATACCA  
TTAAATGGCATTTCGACAAGTTAGGTATTTATGAGGATCTCATAACGTGGGAAGAAATGGATGTTAGATGTTATGC  
TAGTGCCTAATTTTAAAGATTTTAAATACTCATTAAAAATTAATTCATATTTAGGTTATTGGAATTGAGGGAAGTACCA  
CCCCCAAGACCTTCGTTTTAAATCTGCTAAGAGGAGTGAACCTTGCATATAAGAGTCTAAAAGCAGAGTGGATTAG  
ACCACCACTTTTAGCTTATATGTGAGGAAGGTTGAGTTGCCTCTAAAGACTCAGCTCCGTAGTAGAGTAGTTTTAG  
TTACGATTAAAGTGGTACTCTAGGTTAGGTGTTACTCGCGTATTGTGCGATAACGGCAATGCGTCTAATTTTAGT  
ATAGTTTAAACATAATAG

**>VDV1-USA-MD-7-cons**

GGCGATTTATGCCTTCCATAGCGAATTACGGTGCAACTAACAATTTTAGATAGTAGCCATGAACAAACATTATGAT  
TACTCACTACGTATTGATCATTTTTACAATGACTTGCCTAGCATGAAGCGCATGCTTGTAGTTATAACTATGTTAT  
TTTGCAAGTTGGAGATAAATTGTATTGGATTATGGATGCGTGCCTAAGTGTCTACATCTATAGTCTTTTGTGGTTC  
AAGTTTTTGTGTTAGTAGTACAATTTTGAAGAATGTAAGTATCGTATGAATGATATTTGAATGACAACACTGAAGT  
ATAAAATATATAAAATCCAAAATATTTTAAATTTTATTTCAGTGTAGTGTTTAATAGAGTAGAATGCCATGTGACC  
GCTCAAAGAAGTCCATTATGGTATATCATTTCGAAGTTGAATACTTGTGTATAGTTATTGTATTTTATTAGTAATAT  
TAGTAGTCCGTAACCTATCATAATCCTATTATAGTTTATTATATGATAGACCCTGCAGTATCGAGTAGAGTTTAG  
AAAGAGTAGTGAATAGTAAGATCACTGTCACCGACCCTTATTGTAATAGTGAGGTTTGTGCGAAACCAGTTATT  
GTGCAGCGACTAGCAATCGTGAATCAATATAGTTGGTATTCTAAATATGAGACGATTTCGGCGATTTTATTGCGACT  
GAAATTTTCATATTTAGCATGTCAGGTCTTATTATGAATGCTCGAGTATTTATTTCTGCGGTAGAGTAGGGACCCCT  
CTATCTTTCAGGTACTGTATGAGGCGAAAGTGTGAAAGTAATTTATGTCTCTATACATAAGTGACTGTATCGGGAT  
TTCTTTTGGCAAGAATCCTTTTAAATACAGTATAATTTATGCTACGGTACGTTACGTTTCGAGGGCACCCGTTAATG  
TCACATAGCCAGACGATGACGAATGGAAGACATTACTTTTTTATTTAATGCTACGATTATTGCTGTTTTATTTT  
GCTGTTTTTATTGCTATTATATTTTGTCTATTTTATTATTGCTAAATATATTTCTTTGCTATTTTGTCTTTATATA  
TTAGATTCAATCTTTTTTATTTTATATTTTCAATTTGATTTTCGATTTTGAAGGTAAATATATAAAAAATGGCATT  
TAGTTGTGGAACCTTTTCTTATGCTGCTGTTGCTCAAGCTCCCTCTGTAGCTCATGCTCCCCGTAGTTGGGAGATT  
GATGAAGCTAGGCGTCGACGTGTTATTAAGCGTTTGGCGTTGGAACAGGAACGGATTTCGAAACGTTCTTGATGTCA  
CTGTGTATGATCATAACCGTGGGAGCAAGAGGATGCGCGTGATAATGAGTTCTTACGGAACAATTGAATAATTT  
ATATACGATATATTCTATAGCTGAAAGATGTGCCCGCCGCTTCAAGAACATGTCCCATTTCAATCAGTAAT  
AGATATTTCCCTTTTGAATCCCTTAAAGATTGAGGTAGGACAAGATGCGGGTGAGTTTCGTATTTAAGAGACCCAAAT  
ATACAAAGATTTGTAAGAAAGTGAACCGGGTGGCATCAAATTTGTGCGGAGAAAGTTGTTAGGCCCGTTTGTAA  
TCGATCGCCCATGTTATTTTAAATTAAGAAAGTAATATATGATTTACATTTGTATCGGTTACGGAACAAGTT  
CGGCTTCTCAGACGCGAAAAACAGCGTGAATATGAGTTAGAGTGTGTTACTAGTTTGTACAGCTATCTAATCCTG  
TTTCAGCTAAACCTGAGATGGACAATCCTAATCCTGGTCCAGATGGTGAAGGTGAAGTTGAATTAGAAAAAGATAG  
TAATGTAGTATTAACCTACACAACGTGATCCTAGTACCTCTATTCTGCTCCAACCTAGTGTGAAGTGGAGTAGGTGG  
ACTAGTAATGATGTTGTGGATGATTATGCCACTATAACTTCGCGTTGGTATCAGATTGCCGAATTTGTATGGTCAA  
AGGATGATCCATTTGATAAGGAATTGGCGCGCTTAATTTTACCTCGAGCTTTGTTATCTAGTATTGAGGCTAATTC  
TGACGCTATTTGTGATGTACCTAATACTATTCCGTTTAAAGGTACATGCATATTGGCGTGGAGATATGGAAGTTCGA  
GTGCAGATTAACCTCGAATAAATTCAGGTTGGTCAATTACAGGCAACTTGGTATTATTTCGGATCATGAAAATTTGA  
ATATTCAGACGAAGCGAAGTGTGTATGGTTTTTCGCATATGGATCATGCTTTGATTAGTGCATCAGCGAGTAATGA  
AGCAAAATTAGTGATACCTTTTAAACACGTATATCCATTCTTACCAACGCGCGTCTTCTGATTTGGACAACCTGGT  
ATTCTTGATATGGGTACCTTAAATATTCGTGTAATTGCTCCATTACGTATGAGTGCAGCGGGACCAACCCTTGTA  
ATGTTGTAGTATTTATTAAGTTAAATAAGTGAATTCAGTGGTACTTCTCTGGTAAGTTTTACGCGAATCAAAT  
CAGGGCAAAACCTGAAATGGACCGTGTGTTAAATTTGGCAGAAGGATTATTAATAAATACTGTAGGTGGTTGTAAT

ATGGATAATCCGTCATATCAGCAATCTCCGCGTCATTTTGTTCCTACTGGTATGCATAGTTTAGCTTTAGGCACTA  
ATTTAGTAGAGCCTTTGCATGCATTACGATTAGATGCATCAGGTACAACACAACATCCAGTTGGGTGTGCGCCTGA  
TGAAGATATGACTGTATCTTCCATTGCATCACGATATGGTTTAAATTCGCCAAGTGCAATGGAAGAAAGACCATGCG  
AAAGGATCATTTATTATTACAACCTTGATGCTGATCCTTTCGTTGAACAGAAAATTGAGGGAACCAATCCAATTTCTT  
TGTATTGGTTTGGCTCCGGTTGGAGTTGTATCTAGTATGTTTATGCAATGGAGAGGTTCTTTAGAATATAGATTTGA  
TATTATAGCTTCCCAATTCATACGGGTAGGTTAAATGTAGGTTATGTTCCCTGGACTGACTGCTTCTTTACAACGT  
CAAATGGACTATATGAAATGAAATCATCTAGTTATGTAGTGTGTTGATTTACAGGAAAGTAATAGTTTACGTTTG  
AAGTGCCTTATGTGTCATACAGACCGTGGTGGGTGCGTAAGTATGGTGGTAATTATCTGCCATCCTCTACTGATGC  
GCCTAGCACACTGTTTATGTATGTACAAGTGCCATTGATACCTATGGAAGCTGTTTCTGATACTATAGATATCAAT  
GTGTATGTGCGTGGTGGCAGTTCGTTTGGAGTTTGTGTTCCAGTCCAACCTAGTTTAGGTTTGAAC TGAATACAG  
ATTTTATATTACGTAATGATGAGGAGTACCGCGAAAAGAATGGATATGCACCATATTATGCTGGTGTGTGGCATA  
CTTCAATAATAGTAATTCGCTTATTTTAGATGGGGTTCGGCTTCAGATCAAATTCGCTCAATGGCCAACAATAACA  
GTGCCTCGAGGAGAGTTGGCATTCTTGCATACCGCGATGCTAAGCAAGCTGCTGTAGGAACGCAACCTTGGCGTA  
CTATGGTTCGTTTGGCCTTCAGGTCATGGATATAATATTGGAATACCAACTTATAATGCTGAACGAGCAAGACAAC  
TGCTCAGCATTTGTATGGTGGTGGGTCTTTGACAGATGAAAAGGCTAAGCAATTAATTTGTGCCTGCTAACCCAGCAA  
GGACCCGGCAAAGTAAGTAATGGTAACCCCGTCTGGGAAGTAATGCGCGCGCCTCTTGCAACTCAGCAAGCGCATA  
TACAAGATTTTGAATTTGTTGAAGCTGTTCCAGAAGGCGAAGAATCACGCAACACTACAGTGCTAGACACGACAAC  
AACGTTACAGTCTAGCGGATTTGGTTCGTGCTTTCTTTGGTGAGGCATTTAACGATCTTAAGACGTTAATGCGCCGA  
TACCAATTATATGGTCAATTAATGTTATCCGTTACTACGGATAAGGATATTGATCATTGTATGTTTACCTTCCCTT  
GTTTACCTCAAGGGTTAGCGTTAGATATAGGTTTCGGCTGGATCTCCTCATGAAATATTTAATCGCTGCCGTGATGG  
TATCATTCCATTGATAGCGTCAGGGTATCGGTTTTATCGAGGCGACTTACGGTTCAAATTTGTTTTCCCAAGTAAC  
GTTAATAGCAATATTTGGGTACAACATCGACCAGATCGTAGACTGAAAGGATGGTCTGAAGCGAAAATAGTAAACT  
GTGATGCTGTATCTACTGGACAAGGTGTTTATAATCATGGATATGCTAGTCATATTCAGATTACGCGTGTAAATAA  
TGTATAGAAATGGAAGTCCCGTTTTATAACGCTACGTGCTATAATTAATTTGCAAGCGTTTAAACCCATCTAGTGCA  
CGCTCGAGTTATGCCGTTTCGCTCGGAGAGATTTTCGTTGGTTTTTCAGGCTACTAGTGATGATATTTGCAGCCATAG  
TTAATAAACCTGTAACCTATATATTACAGTATTGGCGATGGTATGCAGTTTTTCGCAGTGGGTTGGTTATCAACCAAT  
GATGATTCTGGATCAATTGCCAGCACCTGTAGTTAGGGCTGTGCCTGAGGGCCCTATAGCGAAGATAAAGAAGCTTT  
TTCCACCAAACGGCAGATGAAGTTCGAGAAGCTCAGGCCGCAAAGATGCGTGAAGATATGGGTATAGTAGTCCAAG  
ACGTTATAGGAGAGTTAAGTCAGGCTATACCCGATCTTCAACAACCGGAAGTTCAAGCGAATGTTTTTTCTTGGT  
GTCACAGTTAGTGCATGCTATTATTGGTACTAGTCTTAAGACAGTTGCTTGGGCGATTGTTTTCGATTTTTGTAACT  
TTAGGTTTGATTGGACGTGAAATGATGCATTCAGTCATAACTGTAGTTAAGCGGTTATTAGAAAAATATCACTTGG  
CGACGCAACCCAGGAATCCGCCAATTCAGGTACGGTTATTTCCGCTGTTCCAGAAGCACCCAATGCTGAAGCAGA  
GGAGGCCAGTGCCTGGGTATCCATTATTTATAATGGTGTGTGTAATATGTTGAATGTAGCCGCTCAAAAACCGAAA  
CAATTTAAAGATTGGGTAAAATTAGCTACCGTAGATTTTAGTAATAATTGTAGAGGTAGTAATCAGGTATTTGTGT  
TTTTCAAGAATACGTTTGAAGTGTGGAAGAAAATGTGGGGTTATGTGTTTTGTCAGAGTAATCCTGCAGCGCGACT  
CTTGAAGCAGTGAATGATGAACCTGAGATTTTAAAGCGTGGGTAAAGAATGTCTGTATTTAGATGATCCTAAA  
TTTAGAATGCGACGTGCACATGATCAAGAGTATATTGAGAGAGTGTGTTGCGGCCCATTCGTATGGACAAATTTTAT  
TGCATGACTTAACGGCTGAAATGAATCAATCGCGTAATTTAAGTGTGTTTACGAGAGTGTATGATCAAATATCTAA  
ATTGAAGACGGATCTCATGGAATGGGATCAAACCCATATATCAGGCGTGAATGTTTTACGATTTGTATGTGTGGT  
GCATCTGGAATTGGTAAGTCTTATTTAACTGATTCTTTATGCAGCGAGCTCTTACGTGCGAGTCGTACTCCAGTGA  
CAACGGGCATTAAGTGTGTTGTGAACCTTTGTCTGATTATTGGGATCAGTGTGATTTTCAGCCGTTTTTATGTGT  
TGATGACATGTGGAGTGTGAAACGTCTACTACGCTCGATAAACAGTTAAATATGCTATTTTCAGGTTTCATTCACCA  
ATTGTACTTTCACCTCCTAAAGCTGATTTAGAAGGTAAGAAAATGCGTTATAATCCTGAAATATTCATATATAATA  
CGAATAAACCTTTTCCGAGGTTTGATCGTATAGCTATGGAAGCTATTTATCGACGTAGAAACGTTTTTAATTGAATG  
TAAGGCTAATGAAGAGAAGAAGCGTGGATGTAACATTTGTGAGAATAATATAACCCATTGCTGAATGTAGTCCAAAA  
ATTTTGAAGATTTTTCATCACATTAATTTTCGTTATGCTCATGATGTGTGCAATTCGAAACTACGTGGTCTGAGT  
GGATGTCGTATAATGAATTTTTGGAATGGATTACTCCTGTATATATGGCTAATCGACGTAAAGCAAATGAATCGTT  
TAAGATGCGTGTGATGAAATGCAATGTTGCGTATAGACGAGCCCTTGGAAGGCGATAATATTTTAAATAAGTAT  
GTTGAAGTTAATCAGCGCTTAGTTGAGGAAATGAAAGCTTTTAAAGAGCGAACCCCTGGGCTGATTTACAACGTG  
TTGGCTCAGAGATTAGTACTTCAGTTAAGAAAGCATTACCAACTATTTCCATTACTGAGAAGCTACCACATTGGAC  
CATCCAATGTGGCATAAGCTAAGCCTGAAATGGATCATGCTTATGAAGTTATGAGCTCATATGCAGCAGGAATGAAC  
GCAGAAATGAAGCGCATGAACAAGTTCGTCGTTCTTCTTTGGAATGTCAGTATGTTGAGCCTTCAACTTCAAGAC  
CTCTGGATGAAGAGGGTCCACTATCGACGAGGAATTACTTGGCGAAGTAGAATTTACTTCTTCAGCTTTGGAGCG  
TTTGGTTGATGAGGGGTATATTACTGGTAAACAAAAGAAGTACATGGCAACTTGGTGTACGAAACGAAGAGAGCAT  
GTATCTGATTTTGAATTTAGTATGGATGGATAATTTGCGTGTTTTAAAGTGCATGTTCCACGAGCGTTCTACATCTA  
CGCGTTTGTCTACCGATGATGTTAAATTAATTTAAGACGATTAGTATGTTACATCAGAGGTATGATACCACTGATTG  
TGCAAAATGCCAACATTGGTATGCACCATTAACAGCTATTTATGTTGATGATAGAAAGCTGTTTTGGTGGCAGAAG  
GAGACTAAGACTTTGATAGATGTTTCGTAATTTGTCGAAAGAGGACGTTACAGTCCAATCGAAATTAATTAACCTTAT  
CGTTCCGTGCGGTGATGTATGTATATTACATTCTAAGTACTTTAATTAATTTATTTTATAAAGCGTGGTTGTTGA

AAATCCAACATGGCGTTTAATATATAACGGTACTAAGAAAGGTATGCCTGAGTATTTTCATGAATTGCGTGGATGAA  
ATTTTCATTAGATTCAAAAATTTTGTAAAGTAAAGGTTTGGCTTCAAGCAATTATTGATAAAATATTTGACTCGTCCAG  
TGAAAATGATTCGTGACTTTCTATTTAAATGGTGGCCGCAAGTAGCATACTGTTAAGTTTGTAGGTATAATTGG  
TATAACTGCGTATGAGATGCGTAATCCTAAATCAACAGCAGAAGACTTGGCTGAGCACTATGTTAATAGGCATTTGT  
AGTTCAGATTTTTGGTCACCAGGTATGGCAACTCCTCAGGGATTAATAATATAGTGAAGCGATAACAGCTAAAGCGC  
CTAGAATTCATAGATTGCCCGTTACTACTAGACCTCAGGGATCAACGCAACAAGTTGACGCCGCTGTGAATAAAAT  
TTTGCAGAAATATGGTGTATATCGGTGTTGTGTTTCCAAAAGTGCCTGGTAGTAAGTGGCGAGATATTAATTTTAGA  
TGTCTTATGCTTCATAATCGGCAGTGTTTGATGTTGCGGCATTACATTGAGTCGACGGCTGCTTTTCCGGAGGGTA  
CCAAATACTATTTTAAAGTATATTTCATAATCAAGAACTCGAATGTCAGGTGATATATCTGGTATTGAGATTGATTT  
ATTGAGTTTACCTAGATTGTATTATGGTGGCTTAGCCGGGGAAGAGTCGTTTCGATAGCAATATAGTGTAGTAACT  
ATGCCGAATAGAATTCCTGAGTGTAAAGATTTGTGAAGTTTATAGCTTCACATGCTGAACATGCTCGTGTCTCAA  
ATGATGGTGTGTTAGTTACTGGTGAACATACTCAGTTATTGGCGTTTGAAGAATAATAAAAAACCTATAAGTAT  
TAATGCTGATGGTTTTGTATGAGGTTATACTTCAAGGAGTATACACCTATCCATACCATGGTGTATGGTGTGTTTGTGGG  
TCTATATTATTGTCTCGTAATTTACAACGACCGATTATAGGGATCCATGTAGCTGGTACTGAAGGATTACATGGCT  
TTGGTGTGCTGAACCTCTTGTTCATGAGATGTTCACTGGGAAAGCAATAGAGAGTGAAAGGGGAACCGTATGATCG  
TGTGTATGAATTACCTTTGCGTGAATTAGATGAATCTGATATAGGTTTAGATACTGATTTATATCCTATAGGAAGA  
GTCGATGCGAAATTAGCTCATGCCCAAAGTCTTCAACAGGAATTAATAAGACGCTTATTCATGGTACTTTTTGATG  
TTCGGACTGAACCGAATCCGATGTCATCACGAGACCCAAGAATAGCGCCACATGATCCGTTGAAAGTTGGGGTGTGA  
GAAACATGGTATGCCATGTTCTCCATTTAATCGGAAACATTTGGAATTAGCAACAACCTCATTTAAAGGAGAAGTTA  
ATTTCCGTAGTTAAACCTATAAATGGATGCAAGATTAGAAGTTTGAAGATGCTGTATGTGGTGTACCAGGTTTGG  
ATGGCTTTGATTCAATATCCTGGAATACTAGTGCTGGTTTTCTTTATCTTCATTAACCGCCAGGCTCTTCTGG  
TAAGCGATGGTTGTTTGTATTTGAATTACAAGATTCAGGATGTTATCTTTTGAAGGGATGAGACCTGAACCTGAG  
ATACAGTTGACAACAACCTCAGTTAATGAGGAAGAAGGGAATAAAGCCTCACACTATATTACAGATTGTTTTGAAAG  
ATACATGTTTGCCTGTGGAAAAATGCAGAATACCTGGTAAACTAGAATATTTAGTATAAGTCCCGTCCAATTTAC  
GATTCATTTGACAATACTATCTCGATTTTTATGGCGTCGTACCGTGCCTGAGACTTAATGCTGAGCATGGAATA  
GGTATAGACGTGAACAGCTTGGAAATGGACAACTTGGCAACAAGTCTGTCGAAATATGGCACGCATATTGTGACAG  
GAGATTATAAGAATTTTGGTCTGGGTTAGATTCTGATGTTGCCGCTTTCAGCTTTTGAATTTATCATTGATTGGGT  
GTTAAATTACACTGAAGAAGATGATAAAGACGAAATGAAGCGTGAATGTGGACTATGGCTCAGGAAATCTTAGCT  
CCTAGTCACTTATGTCGTGATTTAGTATATCGCGTGCCATGCGGTATTCCTTCTGGATCACCGATTACGGACATTT  
TGAATACTATTTTGAATTTTGTGTTAATTCGATTGGCTTGGCAAGGTATTACTGATTTGCCTTTATCCGAATTTT  
TAGACATGTCGTGCTAGTTTGTACGGTGTATGATCTCATCATGAATGTAAGTGTAGATGATAGATAAATTCAT  
GCTGTAACAATTGGCGATTTCTTTTTCGCGATATAAGATGGAATTTACGGATCAGGATAAGTCTGGAATACAGTGC  
GGTGGCGAACTTTACAACTGCTACGTTTTTGAAGCATGGGTTCTTGAACATCCAACAAGACCCGTGTTTTCTAGC  
CAATCTGGATAAGGTTTTCTATAGAAGGAACAACCAATTGGACACATGCTCGAGGATTGGGTGCTCGAGTAGCAACC  
ATTGAGAATGCTAAACAAGCGCTAGAGTTGGCATTCCGATGGGGTCCCGAATACTTCAATCATGTTCCGAATACCA  
TTAAAATGGCATTTCGACAAGTTAGGTATTTATGAGGATCTCATAACGTGGGAAGAAATGGATGTTAGATGTTATGC  
TAGTGCGTAATTTTAAAGATTTTAAACTCATTAAAATTAATTCATATTTAGGTTATTGGAATTGAGGGAAGTACCA  
CCCCCAAGACCTTCGTTTTAAATCTGCTAAGAGGAGTGAACCTGCATATAAGAGTCTAAAAGCAGAGTGGATTAG  
ACCACCCTTTTAGCTTATATGTGAGGAAGGTTGAGTTGCCTCTAAAGACTCAGCTCCGTAGTAGAGTAGTTTTAG  
TTACGATTAAGTGGTACTCTAGGTTAGGTGTTACTCGCGTATTGTGCGATAACGGCAATGCGTCTAATTTTAGT  
ATAGTTTAAACC

**>VDV1-USA-MD-12-cons**

ATGGGAGGCGATTTATGCCTTCCATAGCGAATTACGGTGCACCTAACAAATTTTAGATAGTAGCCATGAACAAACAT  
TATGATTACTCACTACGTATTGATCATTTTTACAATGACTTGCGTAGCATGAAGCGCATGCTTGTAGTTATAACTA  
TGTTATTTTGAAGTTGGAGATAAATTGTATTGGATTATGGATGCGTGCACCTAAGTGTCTACATCTATAGTCGTTT  
TGTTTCAAGTTTTTGTGTTAGTAGTACAATTTTGAAGAATGTAAGTATCGTATGAATGATATTTGAATGACAACAC  
TGAAGTATAAAATATATAAAATCCAAAATATTTTAAATTTTATTCAGTGTAGTGTTTAATAGAGTAGAATGCCAT  
GTGACCGCTCAAAGAAGTCCATTATGGTATATCATTTCGAAGTTGAATACTTGTGTATAGTTATTGTATTTTATTAG  
TAATATTAGTAGTCCGTAACCTATCATAATCCTATTATAGTTTGTATTATATGATAGACCACTGCAGTATCGAGTAGA  
GTTTAGAAAAGAGTAGTGCAATAGTAAGATCACTGTCACCGACCACTTATTGTAATAGTGAGGTTTGTGCGAAACCA  
GTTATTGTGCAGCGACTAGCAATCGTGAATCAATATAGTTGGTATTCTAAATATGAGACGATTCCGGCGATTTTATT  
GCGACTGAAATTTTCATATTTAGCATGTCAGGTCTTATTATGAATGCTCGAGTATTTATTTCTGCGGTAGAGTAGGG  
ACCCCTCTATCTTTCAGGTACTGTATGAGGCGAAAGTGTGAAAGTAATTTATGTCTCTATAACATAAGTACTGTAT  
CGGGATTTCTTTGGCAAGAATCCTTTTAAATACAGTATAATTTATGCTACGGTACGTTACGTTTCGAGGGCACCCG  
TTAATGTCACATAGCCCAGACGATGACGAATGGAAAAGACATTACTTTTTATTTTAAATGCTACGATTATTGCTGTTT  
TATTTTGTGTTTTTTATTTGCTATTATATTTTGTCTATTTTATTATTGCTAAATATATTTCTTTGCTATTTTTGCTT  
TATATATTAGATTCATTTCTTTTTATTTTATATTTTCAATTTGATTTTCGATTTTGAAGGTAAATATATATAAAAT

GGCATTTAGTTGTGGAACCTTTTCTTATGCTGCTGTTGCTCAAGCTCCCTCTGTAGCTCATGCTCCCCGTAGTTGG  
GAGATTGATGAAGCTAGGCGTGCACGTGTTATTAAGCGTTTGGCGTTGGAACAGGAACGGATTTCGAAACGTTCTTG  
ATGTCACACTGTGTATGATCATAACAACGTGGGAGCAAGAGGATGCGCGTGATAATGAGTTCCTTACGGAACAATTGAA  
TAATTTATATACGATATATTTCTATAGCTGAAAGATGTGCCCGCCGCTGTTCAAGAACATGTCCCATTTC AATC  
AGTAATAGATATTTCCCCTTTAGAAATCCCCTAAGATTGAGGTAGGACAAGATGCGGGTGAGTTCGTATTTAAGAGAC  
CCAAATATACAAAGATTTGTAAGAAAAGTGAACGGGTGGCATCAAAAATTTGTGCGCGAGAAAAGTTGTTAGGCCCGT  
TTGTAATCGATCGCCCATGTTATTATTTAAAATTAAGAAAGTAATATATGATTTACATTTGTATCGGTTACGGAAA  
CAAGTTCGGCTTCTCAGACGCGAAAAACAGCGTGAATATGAGTTAGAGTGTGTTACTAGTTTTGCTACAGCTATCTA  
ATCCTGTTTCAGCTAAACCTGAGATGGACAATCCTAATCCTGGTCCAGATGGTGAAGGTGAAGTTGAATTAGAAAA  
AGATAGTAATGTAGTATTAACCTACACAACGTGATCCTAGTACCTCTATTCCTGCTCCAACCTAGTGTGAAGTGGAGT  
AGGTGGACTAGTAATGATGTTGTGGATGATTATGCCACTATAACTTCGCGTTGGTATCAGATTGCCGAATTTGTAT  
GGTCAAAGGATGATCCATTTGATAAGGAATTGGCGCGCTTAATTTTACCTCGAGCTTTGTTATCTAGTATTGAGGC  
TAATTCGACGCTATTTGTGATGTACCTAATACTATTCCGTTTAAAGGTACATGCATATTGGCGTGGAGATATGGAA  
GTTTCGAGTGCAGATTAACCTCGAATAAAATTCAGGTTGGTCAATTACAGGCAACTTGGTATTATTCCGGATCATGAAA  
ATTTGAATATTCAGACGAAGCGAAGTGTGTATGGTTTTTCGCATATGGATCATGCTTTGATTAGTGCATCAGCGAG  
TAATGAAGCAAAATTAGTGATACCTTTTAAACACGTATATCCATTCCTACCAACGCGCGTTCGTTCTGATTGGACA  
ACTGGTATTCCTGATATGGGTACCTTAAATATTCGTGTAATTGCTCCATTACGTATGAGTGCAGCGGGACCAACCA  
CTTGTAATGTTGTAGTATTTATTAAGTTAAATAATAGTGAATTCCTGTTACTTCCCTCTGGTAAGTTTTTACGCGAA  
TCAAATCAGGGCAAAACCTGAAATGGACCGTGTGTTAAATTTGGCAGAAGGATTATTAATAATACTGTAGGTGGT  
TGTAATATGGATAATCCGTCATATCAGCAATCTCCGCGTCATTTTGTTCCTACTGGTATGCATAGTTTTAGCTTTAG  
GCACTAATTTAGTAGAGCCTTTGCATGCATTACGATTAGATGCATCAGGTACAACACAACATCCAGTTGGGTGTGC  
GCCTGATGAAGATATGACTGTATCTTCCATTGCATCAGATATGGTTTAAATTCGCCAAGTGAATGGAAGAAAAGAC  
CATGCGAAAAGGATCATTATTTATTACAACCTGATGCTGATCCTTTTCGTTGAACAGAAAATTGAGGGAACCAATCCAA  
TTTTCTTTGTATTGGTTTTGCTCCGGTTGGAGTTGTATCTAGTATGTTTATGCAATGGAGAGGTTCTTTAGAAATATAG  
ATTTGATATTTATAGCTTCCCAATTTTCATACGGGTAGGTTAATTTGTAGGTTATGTTCCCTGGACTGACTGCTTCTTTA  
CAACGTCAAATGGACTATATGAAATTTGAAATCATCTAGTTATGTAGTGTGTTGATTACAGGAAAAGTAATAGTTTTA  
CGTTTTGAAGTGCCTTATGTGTCATACAGACCGTGGTGGGTGCGTAAGTATGGTGGTAATTATCTGCCATCCTCTAC  
TGATGCGCCTAGCACACTGTTTTATGTATGTACAAGTGCCATTGATACCTATGGAAGCTGTTTTCTGATACTATAGAT  
ATCAATGTGTATGTGCGTGGTGGCAGTTCGTTTTGAGTTTTGTGTTCCAGTCCAACCTAGTTTAGTTTTGAACTGGA  
ATACAGATTTTATATTACGTAATGATGAGGAGTACCGCGCAAAGAATGGATATGCACCATATTATGCTGGTGTGTG  
GCATAGCTTCAATAATAGTAATTCGCTTATTTTTAGATGGGGTTCGCGTTTCCAGATCAAATTGCTCAATGGCCAACA  
ATAACAGTGCCTCGAGGAGAGTTGGCATTCTTTCGCTATCCGCGATGCTAAGCAAGCTGCTGTAGGAACGCAACCTT  
GGCGTACTATGGTCGTTTGGCCTTCAGGTCATGGATATAATATTGGAATACCAACTTATAATGCTGAACGAGCAAG  
ACAACCTGCTCAGCATTGTATGGTGGTGGGTCTTTGACAGATGAAAAGGCTAAGCAATTATTTGTGCCTGCTAAC  
CAGCAAGGACCCGGCAAAGTAAGTAATGGTAACCCCGTCTGGGAAGTAATGCGCGCGCCTCTTGCAACTCAGCAAG  
CGCATATACAAGATTTTGAATTTGTTGAAGCTGTTCCAGAAGGCGAAGAATCACGCAACACTACAGTGCATAGACAC  
GACAACAACGTTACAGTCTAGCGGATTTGGTCGTGCTTTCTTTGGTGAGGCATTTAACGATCTTAAGACGTTAATG  
CGCCGATACCAATTATATGGTCAATTATGTTTATCCGTTACTACGGATAAGGATATTGATCATTTGTATGTTTACCT  
TCCCTTGTTTACCTCAAGGTTAGCGTTAGATATAGGTTCCGCTGGATCTCCTCATGAAATATTTAATCGCTGCCG  
TGATGGTATCATTCCATTGATAGCGTCAGGGTATCGGTTTTATCGAGGCGACTTACGGTTCAAAAATTGTTTTCCA  
AGTAACGTTAATAGCAATATTTGGGTACAACATCGACCAGATCGTAGACTGAAAGGATGGTCTGAAGCGAAAATAG  
TAACTGTGATGCTGTATCTACTGGACAAGGTGTTTATAATCATGGATATGCTAGTCATATTCAGATTACGCGTGT  
AAATAATGTTATAGAATTGGAAGTCCCGTTTTATAACGCTACGTGCTATAATTATTTGCAAGCGTTTAAACCCATCT  
AGTGCAGCGTCGAGTTATGCCGTTTCGCTCGGAGAGATTTCCGTTGGTTTTTCAGGCTACTAGTGATGATATTGCAG  
CCATAGTTAATAAACCTGTAACCTATATATTACAGTATTTGGCGATGGTATGCAGTTTTTCGAGTGGGTTGGTTATCA  
ACCAATGATGATTCTGGATCAATTGCCAGCACCTGTAGTTAGGGCTGTGCCTGAGGGCCCTATAGCGAAGATAAAG  
AATTTTTTCCACCAAACGGCAGATGAAGTTCGAGAAGCTCAGGCCGCAAAGATGCGTGAAGATATGGGTATAGTAG  
TCCAAGACGTTATAGGAGAGTTAAGTCAAGCTATAACCGATCTTCAACAACCGGAAGTTCAAGCGAATGTTTTTTC  
CTTGGTGTACAGTTAGTGATGCTATTTATTGGTACTAGTCTTAAAGACAGTTGCTTGGGCGATTGTTTTCGATTTTT  
GTAACCTTTAGTTTTGATTGGACGTGAAATGATGCATTCAGTCATAACTGTAGTTAAGCGGTTATTAGAAAAATATC  
ACTTGGCGACGCAACCCAGGAATCCGCCAATTCAGGTACGGTTATTTCCGCTGTTCCAGAAGCACCCAATGCTGA  
AGCAGAGGAGGCCAGTGCCGGGTATCCATTATTTATAATGGTGTGTGTAATATGTTGAATGTAGCCGCTCAAAAA  
CCGAAACAATTTAAAGATTTGGGTAAAAATTAGCTACCGTAGATTTTAGTAATAATTTGTAGAGGTAGTAATCAGGTAT  
TTGTGTTTTTCAAGAATACGTTTGAAGTGTGGAAGAAAATGTGGGGTTATGTGTTTTGTGAGAGTAATCCTGCAGC  
GCGACTCTTGAAGCAGTGAATGATGAACCTGAGATTTTAAAAGCGTGGGTTAAAAGAAATGTCTGTATTTAGATGAT  
CCTAAATTTAGAATGCGACGTGCACATGATCAAGAGTATATTGAGAGAGTGTGTTGCGGCCCATTCGTATGGACAAA  
TTTTATTGCATGACTTAACGGCTGAAATGAATCAATCGCGTAATTTAAGTGTGTTTACGAGAGTGTATGATCAAAT  
ATCTAAATTTGAAGACGGATCTCATGGAAATGGGATCAAACCCATATATCAGGCCGTGAATGTTTTTACGATTTGTATG  
TGTGGTGCATCTGGAATTTGGTAAGTCTTATTTAACTGATTCCTTTATGCAGCGAGCTCTTACGTGCGAGTCTGACTC

CAGTGACAACGGGCATTAAGTGTGTTGTGAACCCTTTGTCTGATTATTGGGATCAGTGTGATTTTCAGCCCGTTTT  
ATGTGTTGATGACATGTGGAGTGTGAAACGTCTACTACGCTCGATAAACAGTTAAATATGCTATTTTCAGGTTTCAT  
TCACCAATGTACTTTACCTCCTAAAGCTGATTTAGAAGGTAAGAAAATGCGTTATAATCCTGAAATATTCATAT  
ATAATACGAATAAACCTTTCCGAGGTTTGATCGTATAGCTATGGAAGCTATTTATCGACGTAGAAACGTTTTAAT  
TGAATGTAAGGCTAATGAAGAGAAGAAGCGTGGATGTAAACATTGTGAGAATAATATACCCATTGCTGAATGTAGT  
CCAAAAATTTGAAAGATTTTCATCACATTAAATTTTCGTTATGCTCATGATGTGTGCAATTCTGAAACTACGTGGT  
CTGAGTGGATGTCTGATAATGAATTTTGGAAATGGATTACTCCTGTATATATGGCTAATCGACGTAAAGCAAAATGA  
ATCGTTTTAAGATGCGTGTGATGAAATGCAAATGTTGCGTATAGACGAGCCCTTGGAAAGGCGATAATATTTTAAAT  
AAGTATGTTGAAGTTAATCAGCGCTTAGTTGAGGAAAATGAAAGCTTTTAAAGAGCGAACCCCTCTGGGCTGATTTAC  
AACGTGTTGGCTCAGAGATTAGTACTTCAGTTAAGAAAGCATTACCAACTATTTCCATTACTGAGAAGCTACCACA  
TTGGACCATCCAATGTGGCATAGCTAAGCCTGAAATGGATCATGCTTATGAAGTTATGAGCTCATATGCAGCAGGA  
ATGAACGCAGAAATTGAAGCGCATGAACAAGTTCGTCGTTCTTCTTTGGAATGTCAGTATGTTGAGCCTTCAACTT  
CAAGACCTCTGGATGAAGAGGGTCTACTATCGACGAGGAATTACTTGGCGAAGTAGAATTTACTTCTTCAGCTTT  
GGAGCGTTTGGTTGATGAGGGGTATATTACTGGTAAAACAAAAGAAGTACATGGCAACTTGGTGTACGAAACGAAGA  
GAGCATGTATCTGATTTTGTATTTAGTATGGATGGATAATTTGCGTGTTTTAAAGTGCATGTCCACGAGCGTTCTA  
CATCTACGCGTTTGTCTACCGATGATGTTAAATTTTAAAGACGATTAGTATGTTACATCAGAGGTATGATAACCAC  
TGATTGTGCAAAATGCCAACATTGGTATGCACCATTAACAGCTATTTATGTTGATGATAGAAAAGCTGTTTTGGTGC  
CAGAAGGAGACTAAGACTTTGATAGATGTTTCGTAATTTGTCGAAAAGAGGACGTTACAGTCCAATCGAAATTAATTA  
ACTTATCGGTTCCGTTGCGGTGATGTATGTATATTACATTTCTAAGTACTTTAATTTATTTTTCATAAAGCGTGGTT  
GTTTTGAAAATCCAACATGGCGTTTTAATATATAACGGTACTAAGAAAAGGTATGCCTGAGTATTTTCATGAATTGCGTG  
GATGAAATTTTCATTAGATTTCAAATTTTGTAAAGTAAAGGTTTTGGCTTCAAGCAATTTATTGATAAATATTTGACTC  
GTCCAGTGAAAATGATTCGTGACTTTCTATTTAAATGGTGGCCGCAAGTAGCATACTGTTAAGTTTGTAGGTAT  
AATTGGTATAACTGCGTATGAGATGCGTAATCCTAAATCAACAGCAGAAGACTTGGCTGAGCACTATGTTAATAGG  
CATTGTAGTTCAGATTTTGGTACCAGGTATGGCAACTCCTCAGGGATTAATAATATAGTGAAGCGATAACAGCTA  
AAGCGCCTAGAATTCATAGATTGCCCGTTACTACTAGACCTCAGGGATCAACGCAACAAGTTGACGCCGCTGTGAA  
TAAAATTTTGCAGAATATGGTGTATATCGGTGTTGTGTTTTCCAAAAGTGCCTGGTAGTAAGTGGCGAGATATTAAT  
TTTAGATGTCTTATGCTTCATAATCGGCAGTGTGTTGATGTTGCGGCATTACATTGAGTCGACGGCTGCTTTTCCGG  
AGGGTACCAAATACTATTTTAAAGTATATTCATAATCAAGAACTCGAATGTCAGGTGATATATCTGGTATTGAGAT  
TGATTTATTGAGTTTACCTAGATTGTATTATGGTGGCTTAGCCGGGGAAGAGTCTTCGATAGCAATATAGTGTTA  
GTAECTATGCCGAATAGAATTCCTGAGTGTAAAGATATTGTGAAGTTTATAGCTTCACATGCTGAACATGCTCGTG  
CTCAAATGATGGTGTGTTAGTTACTGGTGAACATACTCAGTTATTGGCGTTTGGAGAATAATAAAAACACCTAT  
AAGTATTAATGCTGATGGTTTTGTATGAGGTTATACTTCAAGGAGTATACACCTATCCATACCATGGTGTATGGTGT  
TGTGGGTCTATATTATTGTCTCGTAATTTACAACGACCGATTATAGGGATCCATGTAGCTGGTACTGAAGGATTAC  
ATGGCTTTGGTGTGCTGAACCTCTTGTTCATGAGATGTTCACTGGGAAAGCAATAGAGAGTGAAAGGGAACCGTA  
TGATCGTGTGATGAATTACCTTTGCGTGAATTAGATGAATCTGATATAGGTTTAGATACTGATTTATATCCTATA  
GGAAGAGTCGATGCGAAATTAGCTCATGCCCAAAGTCTTCAACAGGAATTAAAAAGACGCTTATTCATGGTACTT  
TTGATGTTCCGACTGAACCGAATCCGATGTCATCAGGACCCAAGAATAGCGCCACATGATCCGTTGAAGTTGGG  
GTGTGAGAAACATGGTATGCCATGTTCTCCATTTAATCGGAAACATTTGGAATTAGCAACAACCTCATTTAAAGGAG  
AAGTTAATTTCCGTAGTTAAACCTATAAATGGATGCAAGATTAGAAGTTTGAAGATGCTGTATGTGGTGTACCAG  
GTTTTGGATGGCTTTGATTCAATATCCTGGAATACTAGTGTGTTTTCTTTTATCTTTCATTTAAACCGCCAGGCTC  
TTCTGGTAAGCGATGGTTGTTTTGATATTGAATTACAAGATTCAGGATGTTATCTTTTGGAGAGGGATGAGACCTGAA  
CTTGAGATACAGTTGACAACAACCTCAGTTAATGAGGAAGAAGGGAATAAAGCCTCACACTATATTCACAGATTGTT  
TGAAAGATACATGTTTGCCTGTGGAAAAATGCAGAATACCTGGTAAAACCTAGAATATTTAGTATAAGTCCCGTCCA  
ATTTACGATTCCATTTTCGACAATACTATCTCGATTTTATGGCGTGTACCGTGCCGCTAGACTTAATGCTGAGCAT  
GGAATAGGTATAGACGTGAACAGCTTGAATGGACAAACTTGGCAACAAGTCTGTGCAAAATATGGCACGCATATTG  
TGACAGGAGATTATAAGAATTTTGGTCCGGGTTAGATTCTGATGTTGCCGCTTTCAGCTTTTGAATTTATCATTTGA  
TTGGGTGTAAATTACACTGAAGAAGATGATAAAGACGAAATGAAGCGTGAATGTGGACTATGGCTCAGGAAATC  
TTAGCTCCTAGTCACTTATGTCGTGATTTAGTATATCGCGTGCCATGCGGTATTCTTCTGGATCACCGATTACGG  
ACATTTTGAATACTATTTTCGAATTTGTTTGTAAATTCGATTGGCTTGGCAAGGTATTACTGATTTGCCTTTATCCGA  
ATTTTCTAGACATGTCGTGCTAGTTTGTACGGTGTATGATCTCATCATGAATGTAAGTGTAGATGATAGATAAA  
TTCAATGCTGTAAACAATTGGCGATTTCTTTTCGCGATATAAGATGGAATTTACGGATCAGGATAAGTCTGGAAATA  
CAGTGCGGTGGCGAACTTTACAAACTGCTACGTTTTTGAAGCATGGGTTCTTGAACATCCAACAAGACCCGTGTT  
TCTAGCCAATCTGGATAAGGTTTTCTATAGAAGGAACAACCAATTGGACACATGCTCGAGGATTGGGTCGTGAGTA  
GCAACCATTGAGAATGCTAAACAAGCGCTAGAGTTGGCATTCCGATGGGGTCCCGAATACTTCAATCATGTTCCGGA  
ATACCATTAAAATGGCATTCGACAAGTTAGGTATTTATGAGGATCTCATAACGTGGGAAGAAATGGATGTTAGATG  
TTATGCTAGTGCCTAATTTTAAAGATTTTAAACTCATTTAAATTAATTCATATTTAGGTTATTGGAATTGAGGGAA  
GTACCACCCCAAGACCTTCGTTTTAAATCTGCTAAGAGGAGTGAACCTGCATATAAGAGTCTAAAAGCAGAGTG  
GATTAGACCACCCTTTTAGCTTATATGTGAGGAAGGTTGAGTTGCCTCTAAAGACTCAGCTCCGTAGTAGAGTAG

TTTTAGTTACGATTAAGTGGTACTCTAGGTTAGGTGTTACTCGCGTATTGTGCGATAACGGCAATGCGTCCTAAT  
TTTAGTATAGTTTAAACCATAATAG

**>VDV1-USA-FL-22-cons**

TGGGAGGCGATTTATGCCTTCCATAGCGAATTACGGTGCAACTAACAAATTTTAGATAGTAGCCATGAACAAACATT  
ATGATTACTCACTACGTATTGATCATTFTTTACAATGACTTGCGTAGTATGAAGCGCATGCTTGTAGTTATAACTAT  
GTTATTTTGCAGTTGGAGATAATTGTATTGGATTATGGATGCGTGCACTAAGTGTCTACATCTATAGTCGTTTGT  
GGTTCAAGTTTTTGTGTTAGTAGTACAATCTTGAGGAATGTAAGTATCGTATGAATGATATTTGAATAACAACACT  
GAAGTATAAAATATATAAAATCCAAAAATATTTTAACTTATTTCAGTGTAGTGTTTGATAGAGTAGAATGCCATG  
TGACCGCTCAAAGAAGTCCATTATGGTATATCATTTCGAAGTCAATACTTGTGTATAGTTATTGTATTTTATTAGT  
AATATTAGTAGTCCGTAACATCATAATCCTATTATAGTTTGGATTATATGATAGACCACTGCAGTATCGAGTAGAG  
TTTAGAAAAGTAGTGAATAGTAAGATCACTGTCACCGACCACTCATTGTAATAGTGAGGTTTGTGCGAAACCAG  
TTATTGTGCAGCGACTAGCAATCGTGAATCAATATAGTTGGTATTCTAAATATGAGACGATTCGGCGATTTTATTG  
CGACTGAAATTTTCATATTTAGCATGTGAGGTCTTATTATGAATGCTCGAGTATTTATTTCTGCGGTAGAGTAGGGA  
CCCCTCTATCTCTCAGGTACTGTATGAGGCGAAAGTGTGAAAGTAAATTTATGTCTCTATACATAAGTGACTGTATT  
GGGATTTCCTTTGGCAAGAATCCTTTTAAATACAGTATAATTTATGCCACGGTACGTTACGTTTCGCAGGGCACCCGT  
TAATGTCACATAGCCCAGACGATGACGAATGGAAAGACATTACTTTTATTTTAAATGCTACGATTATTGCTGTTTT  
ATTTTGTGTTTTTAAATTTGCTATTATATTTTGTCTATTTTATTATTGCTAAATATATTTCTTTGCTATTTTTGCTTT  
ATATATTAGATTCAATTCCTTTTTATTTTATATTTTCAATTTGATTTTGAAGGTAAATATATATAAAAAATG  
GCATTTAGTTGTGGAACCTTTCTTATGCTGCTGTTGCCAAGCTCCCTCTGTAGCTCATGCTCCCGTAGTTGGG  
AGATTGATGAAGCTAGGCGTCGACGCGTTATTAAGCGTTTGGCGTTGGAACAGGAACGGATTCGAAACGTTCTTGA  
CGTCACTGTGTATGATCATAACCGTGGGAGCAAGAGGATGCGCGTGATAATGAGTTCCTTACGGAACAATTGAAT  
AATTTATATATGATATATTTCTATAGCTGAAAGATGTACCCGTCGCCCTGTTCAAGAACATGTCCCATTTCAATCA  
GTAATAGATATTTCCCTTTAGAATCCCTTAAAGATTGAGGTAGGAAAAGACGCAGGTGAGTTCGTATTTAAGAAACC  
CAAATATACAAAGATTTGTAAGAAAGTAAACGGGTGACATCAAAATTTGTGCGGAGAAAGTTGTTAGGCCCGTT  
TGTAATCGATCGCCCATGTTATTATTTAAAATTAAGAAAGTAATATATGATTTACATTTGTATCGGTTACGGAAAC  
AAGTTCCGCTTCTCAGACGCGAAAACAGCGTGAATACGAGTTAGAGTGTGTTACTAGTTTGCTACAGCTATCTAA  
TCCTGTTTCAGCTAAACCTGAGATGGACAATCCTAATCCTGGTCCAGATGGTGAAGGTGAAGTTGAATTAGAAAAG  
GATAGTAATGTAGTATTAACACACAACGTGATCCTAGTACCTCTATTCCTGCTCCAAGTGTGAAGTGGAGTA  
GATGGACTAGTAATGATGTTGTGGATGATTATGCCACTATAACTTCGCGTTGGTATCAAATTTGCCGAATTTGTATG  
GTCAAAGGATGATCCATTTGATAAGGAATTGGCGCGCTTAAATTTACCTCGAGCTTTGTTATCTAGTATTGAGGCT  
AATTCCTGACGCTATTTGTGATGTACCTAATACTATTCCGTTTAAAGTACATGCATATTGGCGTGGAGATATGGAAG  
TTCGAGTGCAGATTAACCTGAATAAATTCAGGTTGGTCAATTACAGGCAACTTGGTACTATTTCGATCATGAAAA  
TCTGAATATCCAGACGAAGCGAAGTGTGTATGGTTTTTCGCATATGGATCATGCTCTGATTAGCGCATCAGCGAGT  
AATGAAGCAAATTAGTGATACCTTTTAAACACGCATATCCATTCCTACCAACGCGTGTGCTTCCGATTGGACAA  
CTGGTATTCTTGATATGGGTACCTTAAATATTCGTGTAATTGCTCCACTACGTATGAGTGCAGCGGACCAACCAC  
TTGTAATGTTGTAGTATTTATTAAGTTAAATAATAGTGAATTCACTGGTACTTCTTCTGGTAAAGTTTTACGCGAAT  
CAAATTAGGGCAAACCTGAAATGGACCGTGTGTTAAATTTGGCAGAAGGATTACTAAATAATACTGTAGGTGGTT  
GTAATATGGATAATCCGTCATATCAGCAATCTCCGCGTCATTTTGTTCCTACTGGTATGCATAGTTTAGCTTTAGG  
CACTAATTTAGTAGAGCCTTTGCATGCATTACGATTAGATGCATCAGGTACAACAACATCCAGTTGGGTGTGCG  
CCTGATGAAGATATGACTGTATCTTCCATTGCATCACGATATGGTTTAAATTCGCCAAGTGAATGGAAGAAAGACC  
ATGCGAAAGGATCATTATTTACAACCTTGATGCTGATCCTTTTCGTTGAACAGAAAATTGAGGGAACCAATCCAAT  
TTCTTTGTATTGGTTTTGCTCCGTTGGAGTCGTATCTAGTATGTTTATGCAATGGAGAGGTTCTTTAGAATATAGA  
TTTGATATTATAGCTTCCCAATTTCATACGGGTAGGTTAATTGTAGGTTATGTTCCGACTGACTGCTTCTTTAC  
AACGTCAAATGGACTATATGAAATTGAAGTCATCTAGTTATGTGGTGTGTTGATTTACAGGAAAGTAATAGTTTAC  
GTTTGAAGTGCCCTATGTGTCATACAGACCGTGGTGGTGCAGTAAAGTATGGTGGTAATTATCTGCCATCTTCTACT  
GATGCGCCTAGCACACTGTTTATGTATGTACAAGTACCATTGATACCTATGGAAGCTGTTTCTGATACTATAGATA  
TCAATGTGTATGTGCGTGGTGGCAGTTCGTTTGGAGTTTGTGTTCCAGTCCAACCTAGTTTAGGTTTGAAGTGGAA  
TACAGATTTTCATATTACGTAATGATGAGGAGTACCGCGCAAAGAATGGATATGCACCATATTATGCTGGTGTGTGG  
CATAGCTTCAATAATAGTAATTCGCTTGTTTTTTAGATGGGGTTCCGGCTTCAGATCAAATTTGCTCAATGGCCAACA  
TAACAGTGCCTCGAGGAGAGTTGGCATTCCTGCGTATCCGCGATGCTAAGCAAGCTGCTGTAGGAACGCAACCTTG  
GCGTACTATGGTTCGTTTGGCCTTCAGGTCATGGATATAATATTGGAATACCAACTTATAATGCTGAACGAGCAAGA  
CAACTTGCTCAGCATTGTATGGTGGTGGGCTTTTGACAGATGAAAAGGCTAAGCAATTTATTTGTGCCTGCTAACC  
AGCAAGGACCCGGCAAAGTAAGTAATGGTAACCCCGTCTGGGAAGTAATGCGCGCGCCTCTTGCAACTCAGCAAGC  
GCATATACAAGATTTTGAATTTGTTGAAGCTGTTCCAGAAGGCGAAGAATCACGCAACACTACGGTGTAGACACA  
ACAACAACGTTACAGTCTAGCGGATTTGGTTCGCGCTTCTTCCGGTGGGCAATTAACGATCTTAAAGACGTTAATGC  
GCCGATACCAATTTGTATGGTCAATTTATGTTATCCGTTACTACGGATAAGGATATTGATCATTGTATGTTTACCTT  
CCCTTGTTTACCTCAAGGTTAGCGTTAGATATAGGTTCCGCTGGATCGCCTCATGAAATATTTAATCGCTGCCGT



GATGGTATCATTCCGTTGATAGCGTCAGGGTATCGGTTTTATCGAGGCGATTTACGGTTCAAAAATTGTTTTCCCAA  
GTAACGTTAATAGCAATATTTGGGTACAACATCGACCAGATCGTAGACTGAAAGGATGGTCTGAAGCGAAAAATAGT  
AAACTGTGATGCTGTATCTACTGGACAAGGTGTTTATAATCATGGATATGCTAGTCATATTCAGATTACGCGTGTA  
AATAATGTTATAGAATTGGAAGTCCCGTTTTATAACGCTACGTGCTATAATTATTTGCAAGCGTTTAACCCATCTA  
GTGCAGCGTCGAGTTATGCCGTTTTCGCTCGGAGAGATTTCCGGTTGGTTTTCAAGCTACTAGTGATGACATTGCAGC  
CATAGTTAATAAACCTGTAACATATATAATTACAGTATTTGGCGATGGTATGCAGTTTTTCGCAGTGGGTTGGTTATCAA  
CCAATGATGATTCTAGACCAATTGCCAGCACCAGTAGTTAGGGCTGTGCCTGAGGGCCCTATAGCGAAGATAAAGA  
ACTTTTTCCACCAAACGGCAGATGAAGTTCGAGAAGCTCAGGCCGCAAAGATGCGTGAAGATATGGGTATAGTAGT  
CCAAGACGTTATAGGAGAGTTAAGTCAGGCTATACCCGATCTTCAACAACCCGGAAGTTCAAGCGAATGTTTTTCT  
CTGGTGTACAGTTAGTGCATGCTATCATCGGTACTAGTCTTAAGACAGTTGCTTGGGCGATTGTTTCGATTTTTG  
TAACTTTAGGTTTGATTGGACGTGAAATGATGCATTCAGTCATAACTGTAGTTAAGCGGTTATTAGAAAAATATCA  
CTTGGCGACGCAACCCAGGAATCCGCCAATTCAGGTACGGTTATTTCCGCTATTTCCAGAAGCACCCAATGCTGAA  
GCAGAGGAGGCCAGTGCCCTGGGTATCCATTATTTATAATGGTGTGTGTAATATGTTGAATGTAGCCGCTCAAAAAC  
CGAAACAATTTAAAGATTGGGTAATAATTAGCTACCGTAGATTTTTAGTAATAATTGTAGAGGTAGTAATCAGGTATT  
TGTGTTTTTCAAGAATACGTTTTGAAGTGTGAAAGAAAATGTGGGGTTATGTGTTTTGTGTCAGAGTAATCCTGCAGCG  
CGACTCTTGAAAGCAGTGAATGACGAACCTGAGATTTTAAAGCGTGGGTTAAAGAATGTCTGTATTTAGATGATC  
CTAAATTTAGAATGCGACGTGCGCATGATCAAGAGTATATTGAGAGAGTGTTCGCGCCCATTCGTATGGACAAAT  
TTTATTGCATGACTTAAACGGCTGAAATGAATCAATCGCGTAATTTAAGTGTGTTTACGAGAGTGTATGATCAAATA  
TCTAAATTTGAAGACGGATCTCATGGAAAATGGGATCAAACCCATATATCAGGCGTGAATGCTTTACGATTTGTATGT  
GTGGTGCATCTGGAATTGGTAAGTCTTATTTAACTGATTCTTTATGCAGCGAGCTCTTACGTGCGAGTTCGTACTCC  
AGTGACAACGGGCATTAAGTGTGTGCTGAACCCTTTGTCTGATTATTGGGATCAGTGTGATTTTCAGCCCGTTTTA  
TGTGTTGATGACATGTGGAGTGTGAAACGTCTACTACGCTCGATAAACAGTTAAATATGTTATTTACAGGTTTCATT  
CACCAATTGTACTTTACCCGCTAAAGCTGATTTAGAAGGTAAGAAAATGCGTTATAATCCTGAAATATTCATATA  
TAATACGAATAAACCTTTTCCGAGGTTTGATCGTATAGCTATGGAAGCTATTTATCGACGTAGAAACGTTTTAATT  
GAATGTAAGGCTAATGAAGAGAAGAAGCGTGGATGTAACATTTGTGAGAATAATATACCCATTGCTGAATGTAGTC  
CAAAAATTTGAAAGATTTTCATCACATTAATTTCTGTTATGCTCATGATGTGTGTAATTTCTGAAACTACGTGGTC  
TGAGTGGATGTCGTATAATGACTTTTTTGAATGGATTACTCCTGTATATATGGCTAATCGACGTAAAGCAAATGAA  
TCGTTTTAAGATGCGTGTGATGAAATGCAAATGTTGCGTATGGATGAGCCCTTGAAGGCGATAATATTTTAAATA  
AGTATGTTGAAGTTAATCAGCGCTTAGTTGAGGAAATGAAAGCTTTTAAAGAGCGAACCCCTCTGGGCTGATTTACA  
ACGTGTTGGCTCAGAGATTAGTACTTCAGTTAAGAAAGCATTACCAACTATTTCCATTACTGAGAGGCTACCACAT  
TGGACTATCCAATGTGGCATAGCTAAGCCTGAAATGGATCATGCTTATGAAGTTATGAGTTCATATGCAGCAGGAA  
TGAACGCAGAAATTGAAGCGCATGAACAAGTTCGTCGTTCTTCTTTGGAATGTCAGTATATTGAGCCTTCAACTTC  
AAGACCTCTGGATGAAGAGGGTCTACTATCGACGAGGAATTACTTGGCGAAGTAGAATTTACTTCTTCAGCTTTG  
GAGCGTTTTGTTGATGAGGGGTATATTACTGGTAAACAAAAGAAGTATATGGCAACTTGGTGTACGAAACGAAGAG  
AGCATGTATCCGATTTTGATTTAGTATGGACGGATAATCTGCGTGTGTTTTGAGTGCATATGTCCACGAGCGTTCTAC  
ATCTACGCGTTTTATCTACCGATGATGTTAAATTTAAGACGATTAGTATGTTACATCAGAGGTATGATACCACCT  
GATTGTGCAAAATGCCAACATTTGGTATGCACCATTAACAGCTATTTATGTTGATGATAGAAAGCTATTTTGGTGCC  
AGAAGGAGACTAAGACTTTGATAGATGTTTCGTAAATTTGTCGAAAGAGGATGTTACAGTCCAATCGAAATTAATTA  
CTTATCGGTTCCGTGCGGTGATGTGTGATGTTACATTTCTAAGTACTTTAATTATTTATTTCCATAAAGCGTGGTTG  
TTTGAATAATCCAACATGGCGTTTTAATATATAATGGTACTAAGAAAGGTATGCCTGAGTATTTTCATGAATTCGCTGG  
ATGAAATTTTCATTAGATTCAAAATTTTGTAAAGTAAAGTTTTGGCTTCAAGCAATTTATGATAAATATTTGACTCG  
TCCAGCGAAAATGATTCGTGACTTTCTATTTAAATGGTGGCCGCAAGTAGCATACTGTTAAGTTTTGTTAGGTATA  
ATTTGGTATAACTGCGTATGAAATGCGTAATCCTAAATCAACAGCAGAAGACTTGGCTGAGCACTATGTTAATAGGC  
ATTTGATGTTTCAAGTTTTTGGTCAACAGGCATGGCGACTCCTCAGGGATTAATAATAGTGAAGCGATAACAGCTAA  
AGCGCCTAGAATCCATAGATTGCCCGTTACTACTAGACCTCAGGGATCAACGCAACAAGTTGACGCCGCTGTGAAT  
AAGATTTTGCAGAATATGGTGTATATCGGTGTTGTGTTTTCAAAAAGTGCCTGGTAGTAAGTGGCGAGATATTAATT  
TTAGATGTCTTATGCTTCATAATCGGCAATGTTTGATGTTGCGGCATTACATTGAGTCGACGGCTGCTTTTTCCGGA  
GGGTACCAATACTATTTTAAAGTATATTCATAATCAAGAACTCGAATGTCAGGTGATATATCTGGTATTGAGATT  
GATTTATTGAGTTTACCTAGATTATATTTATGGTGGCTTAGCTGGGGAAGAGTTCGTTAGTATAGTAATATAGTGTAG  
TAACTATGCCGAATAGAATTCCTGAGTGTAAAGATTTGTGAAGTTTATAGCTTACATGCTGAACATGCTCGTGC  
TCAAAATGATGGTGTGTTAGTTACTGGTGAACATACTCAGTTATTTGGCGTTTCGAGAATAATAATAAAACACCTATA  
AGTATTAATGCTGATGGTTTGTATGAGGTTATACTTCAAGGAGTATACACTTATCCATAACCATGGTGTAGGTTT  
GTGGGTCTATATTTATGTCGTAATTTACAACGACCGATTATAGGGATCCATGTAGCTGGTACTGAAGGATTACA  
TGGCTTTGGTGTGCTGAACCTCTTGTTCATGAGATGTTCACTGGGAAAGCAATAGAGAGTGAAGGGGAACCGTAT  
GATCGTGTGATGAATTACCTTTGCGTGAATTAGATGAATCTGATAAGGTTTAGATACTGATTTATATCCTATAG  
GAAGAGTTGATGCGAAATTAGCTCATGCCCAAAGTCTTCAACAGGAATTAAGAAAGACGCTTATTCATGGTACTTT  
TGATGTTCCGACTGAACCGAACCCGATGTCATCACGAGACCAAGAATAGCGCCACATGATCCGTTGAAGTTAGGG  
TGTGAGAAAACATGGTATGCCATGTTCTCCATTTAATCGAAAACATTTGGAATTAGCAACAACCTATTTAAAGGAGA  
AGTTAATTTCCGTAGTTAAACCTATAAACGGATGCAAGATTAGAAGTTTGAAGATGCTGTGTGTTGGTGTACCAGG

TTTGGATGGCTTTGATTCAATATCCTGGAATACTAGTGCTGGTTTTCTTTATCTTCATTAAAACCGCCAGGCTCT  
TCTGGTAAGCGATGGTTGTTTGATATTGAATTACAAGATTCTGGATGTTATCTTTTGAGAGGGATGAGACCTGAAC  
TTGAGATACAGTTGACAACAACCTCAGTTAATGAGGAAGAAGGGAATAAAGCCTCACACTATATTCACGGATTGTTT  
GAAAGATACATGTTTGCCTGTGGAAAAATGCAGAATACCTGGTAAGACTAGAATATTTAGTATAAGTCCCGTCCAA  
TTTACGATTCATTCCGACAATACTATCTCGATTTTATGGCGTCTGACCGTGCCGCTAGACTTAATGCTGAGCATG  
GAATAGGTATAGACGTGAACAGCTTGGAAATGGACAAACTTGGCAACAAGTCTGTGCAAGTATGGCAGCATATTTGT  
GACAGGAGATTACAAGAAATTTTGGTCTGGGTTAGATTCTGATGTTGCCGCTTCAGCTTTCGAAATTATCATTGAT  
TGGGTGTTAAATTACACTGAAGAAGATGATAAAGACGAAATGAAGCGTGTAAATGTGGACTATGGCTCAGGAAATCT  
TAGCTCCTAGTCACTTATGTCGTGATTTAGTATATCGCGTACCATGCGGTATTCTTCTGGATCACCAATTACGGA  
CATTTTGAATACTATTTTGAATTGTTTGTAAATTCGATTGGCTTGGCAAGGTATTACTGATTTGCCTTTATCCGAA  
TTTTCTAGACATGTCGTGCTAGTTTGTATGGTGATGATCTCATCATGAATGTAAGTGTAGATGATAGATAAAT  
TCAACGCTGTAACAATTGGCGATTTCTTTTCGCGATATAAGATGGAATTTACGGATCAGGATAAATCTGGAAATAC  
AGTGCGGTGGCGAACTTTACAACTGCCACGTTTTTGAAGCATGGGTTCTTAAACATCCAACAAGACCCGTGTTT  
CTAGCCAATCTGGATAAAGTTTTCTATAGAAGGAACAACCAATTGGACACATGCTCGAGGATTGGGTGCTCGAGTAG  
CAACCATTGAGAATGCTAAACAAGCGCTAGAGTTGGCATTTCGGATGGGGTCCCGAATACTTTAATCATGTTCCGAA  
TACCATTAANAATGGCATTTCGACAAGTTAGGTATTTATGAGGATCTCATCACATGGGAAGAAATGGATGTTAGATGT  
TATGCTAGCGCGTAAATTTAAGATTTTAACTACTCATTAAAATTAATTTATATTTAGGTTATTGGAATTGAGGGAA  
TACCACCCCAAGACCTTCGTTTTAAATCTACTAAGAGGAGTGAACCTTGCATATAAGAGTCTAAAAGCAGAGTGG  
ATTAGACCACCTTTTAGCTTATATGTGAGGAAGGTTGAGTTGCCCTTAAAGACTCAGCTCCGTTAGTAGAGTAGT  
TTTAGTTACGATTAAGTGGTACTCTAGGTTAGGTGTTACTCGCGTATTGTGCGATAACGGCAATGCGTCTAATTT  
TTAGTATAGTTTAAACCATAATA

**>DWV-USA-MD-2-cons**

TGGGAGGCGATTTATGCCTTCCATAGCGAATTACGGTGCAACTAACAATTTTAGATAGTAGCCATGAACAAACATT  
ATAGTGGCTCACTACGTATTGATCATTTTTATAATGACTTGCCTAGCATGAAGCGCATGCTTGTAGTTGTAACAT  
GTTACTTTGCAAGTTGGAGTTTACTATTTTGGATTATGAATATGTGCACTTAGTGTCTGTATTTATAGTCGTTTGT  
GGTTCAAGTTTTTGTGTTAGTAGTACACTTATGTATGAATGTACCTTTAGTATGAATGTTATAGAATGACAATATC  
GAAAGAAAAATCTTTATAAAATACAAAATATTGTTTTTATTATTTTCGATATGGTGTTTTTATAGAGTAGATTGCCA  
TGTGACCGCTCGTAGAAGTCCATTATGGTTTTATCAATCGAAGTTGAATGATTTTATAAGAATATTACTTAAATTA  
GTAATATTAGTAGTCCGTAACATTTATCATCCTTTTTTTCAGTTTGATGTGATAATAGACCCTGCAGTATCGAGTAG  
AGTTTTCGAATGCGTAGTGAATAGTACAATCACTGTCACCGACCATCTATTGTAATGATAGATCTGTCGGAAACCA  
TTATTTATGAAGTGAAGTACTAGCAATCATGGATTAATTTAGATGGTATTCTAGTTTAGAGGTGATTTCGGCGCTGCGGTG  
CGACTGAACTTCTAAATTAGCATGTCAGATTGTATTATGAATGCGTTAGTAGTAATTTCTGCGATAGAGCTGGGA  
CCCCTCAGTCTCTCAGGTATTGTACGAGGCGAAAGTGTAAAGTTTTGTATGTGTTTTTATATGTACGACTGTATC  
GGGAATTCCTTTAGCAAGAATCCTTTTAAACAGTATAATCTGTGCTACGGTACGTTACGTTTCGAGGGCACCCGT  
TAATGTCTCATAGCCAGACGATGGCGGATGGAAAGACATCATATTTTATTTTAAATGCTGTCTTTATTGCTGATTT  
ATCTTGCTGTTTTTATTTGCTATTTTTATATTTGCTAATTTTTCATTATTGCGAAATATATTACATTGCTATTTTTAT  
TATATACGCTAGATTTCAATTTTTATTTTCTTATATTTTCAATTTAATTTTGAATTTGAAGGTAATATATATAATT  
AATTTAATAAATGGCTTTTAGTTGTGGAACCTTTTCTTACTCTGCCGTCGCCAAGCTCCGTCTGTTGCCTATGC  
ACCTCGTACATGGGAAGCTGATGAAGCTAGGCGGCGCGAGTCATTAAACGTTTGGCGCTGGAGCAAGAACGTATG  
CGTAACGTTCTTGACGTTGGCGTCTATGACCAGGCGACATGGGAACAGGAGGACGCGCGCGATAATGAGTTCCTAA  
CGGAACAATTAACAATTTATATACTATTTATTCGATCGCTGAACGTTGTACGCGTCGACCTATTAAGAGCACTC  
TCCTATATCAGTTTTCGAATAGGTTTGTCCATTGGAATCCCTCAAGGTCGAGGTCGGTCAAGAAGCAGGCGAATGT  
ATATTTAAGAAACCTAAATATACGCGGTTTTGCAAGAAAGTGAAGCGTGTGCAACTCGCTTCGTTTCGTGAAAAAG  
TTGTTTCGTCCATGTGTTCTAGATCTCCTATGCTATTTAAGCTTAAAGAAAATTTATTTATGATTTGCACTTATA  
TAGATTAAGAAAACAGATTAGGATGTTGAGACGTCAAAAACAGCGCGAGTATGAGTTAGAGTGTGTCACATAATCTG  
TTACAATTATCGAATCCGGTGCAGGCAAAACCAGAGATGGATAACCCTAATCCAGGACCTGATGGCGAGGGTGAAG  
TTGAATTAGAAAAGGATAGTAATGTTGTTTTAACAACCTCAGCGAGATCCTAGTACATCTATTCCAGCGCCGGTGAG  
CGTAAAATGGAGTAGATGGACTAGTAATGATGTAGTAGATGATTACGCCACAATCACATCTCGATGGTATCAGATT  
GCTGAATTTGTTTGGTGAAGGATGATCCATTTGATAAGGAGTTAGCACGTTTAAATTTGCTCGTCTTTGTTAT  
CTAGTATAGAGGCTAATTCGATGCTATATGTGATGTGCTAATACTATTCCATTTAAGGTACACGCATATTGGCG  
AGGCGATATGGAAGTTAGAGTTCAAATTAATTTCAAATAAATTTCAAAGTTGGTCAATTACAAGCTACTTGGTATTAT  
TCGGATCATGAGAATTTGAATATATCGTCTAAGAGAAGCGTTTATGGATTTTACAAATGGATCATGCTTTGATTA  
GTGCGTCAGCAAGTAATGAAGCAAAATTAGTTATTCCATATAAGCATGTTTATCCATTTTTACCAACAAGAATTGT  
GCCAGATTGGACTACTGGCATTTTAGATATGGGTGCTTTGAACATTCGTGTAATTTGCTCCCTTACGGATGAGTGCT  
ACTGGTCCAACCTGTAATGTGCTGCTGTTTTATTAAATTAATAACAGCGAGTTTACAGGGACTTCCCTCTGGTA  
AGTTTTATGCGAGCCAAATCAGGGCAAAACCTGAGATGGATCGTATATTAATTTAGCAGAAGGATTGTTGAATAA  
CACGATTGGTGGTAATAATATGGATAATCCTTCTTATCAACAATCTCCTCGTCATTTTGTCCCGACTGGTATGCAC

AGCTTAGCTTTAGGTAATAATTTAGTTGAACCATTACATGCATTACGTTTGGATGCAGCCGGTACGACACAACATC  
CTGTAGGTTGTGCTCCTGATGAAGATATGACTGTGTCTTCCATTGCATCTCGATATGGACTAATTAGACGGGTACA  
ATGGAAGAAAGATCATGCTAAAGGATCGCTTTTGTACAATTAGATGCTGATCCATTTGTGGAGCAAAGAATTGAA  
GGTACGAATCCAATATCTTTGTATTGGTTTCGCACCCGTGGGTGTAGTATCTAGTATGTTTATGCAATGGCGTGGTT  
CATTAGAATATAGGTTTGTATTTATAGCATCCCAATTTTACTACTGGTAGGTTAATTTGTAGGTTATGTGCCCGGTTT  
GACAGCATCTTTGCAACTTCAAATGGACTATATGAAAATTGAAGTCATCGAGTTATGTAGTATTTGATTTACAGGAA  
AGTAATAGCTTCACTTTTGGAGGTGCCATATGTTTCATATAGACCATGGTGGGTGCGTAAATATGGTGGCAATTATT  
TGCCCTCGTCAACTGATGCTCCTAGTACATTATTCATGTATGTGCAGGTTCCGTTGATACCTATGGAAGCTGTTTC  
AGATACTATTGATATCAATGTGTACGTACGGGGCGGTAGTTTCAATTTGAAGTTTGTGTTCCAGTCCAACCTAGTTTA  
GGTTTGAATTGGAACACAGACTTTATTTTACGTAATGACGAAGAATACAGGGCTAAGACAGGTTATGCACCATATT  
ATGCTGGAGTGTGGCATAGCTTTAATAATAGTAATTTCTCTTGTTTTTAGGTGGGGATCTGCTTCTGATCAAATTC  
TCAGTGGCCGACAATTTTCACTACCAAGAGGTGAGTTAGCTTTTCTTACGAATTAAGGATGGAAAAGCAAGCTGCTGTA  
GAACTCAACCTTGGCGTACGATGGTTGTTTGGCCTTCTGGTCACGGCTATAATATTGGTATAACCCACGTATAATG  
CTGAACGAGCTCGCCAGCTTGCACAACACTTATATGGTGGTGGATCATTAACCTGATGAGAAGGCCAAACAATTATT  
TGTTCTGCTAATCAACAAGGACCTGGTAAGGTAAGTAATGGAAATCCGGTATGGGAAGTCATGCGTGCACCATTTG  
TCAACACAGCGTGCGCATATGCAAGATTTTGAATTTATTGAGGCTATTCCAGAAGGAGAGGAGTCTCGTAATACTA  
CAGTCTTGGATACGACCACTACTTTACAGTTCGAGTGGGTTTTGGTTCGCGCCTTCTTTGGAGAAGCTTTTTAATGATCT  
TAAAACGTTAATGCGGCGATATCAATTTATGGTCAAATTTATTATTGTCCGTTACTACGGATAAGGATATTGATCAT  
TGTATGTTTACCTTCCCTTGTTTACCACAAGGGTTAGCGTTAGACATTTGGTTCTGCTGGCTCTCCACATGAAAATCT  
TTAATAGATGTCGTGATGGTATTATACCATTAATTTGCATCTGGATATAGATTTTATAGAGGAGATTTGCGTTATAA  
GATTTGTTTTTCCAAGTAATGTTAATAGCAACATTTGGGTACAACATCGACCCGGATCGTAGACTGGAAGGATGGTCC  
GCGGCTAAGATTGTAAATTTGTGATGCTGTGTCTACTGGTCAAGGAGTGTATAATCATGGTTATGCTAGTCCACATTC  
AAATCACGCGTGTAAATAATGTTATAGAATTTGGAAGTTCATTTTATAATGCTACTTGTATAATTTATTTACAGGC  
GTTTAATGCGTCTAGCGCTGCATCTAGTTATGCAGTATCTTTAGGAGAAATATCGGTTGGTTTTCAAGCCACAAGT  
GATGATATCGCATCTATCGTCAACAAACCTGTTACTATTTATTATAGTATTGGAGATGGTATGCAGTTTTCTCAGT  
GGGTTGGATATCAACCGATGATGATCCTAGATCAGCTTCCCTGCACCAGTAGTAAGGGCCGTGCCCTGAGGGCCCTAT  
TGCGAAGATTAAAACTTCTTCCATCAAACAGCCGACGAAGTTAGAGAAGCTCAGGCAGCAAAGATGCGTGAAGAT  
ATGGGTATGGTTGTTCAAGATGTTATTGGAGAACTTAGCCAGGCCATACCAGGATCTTCAACAACCGGAGGTTCAAG  
CAAATGTCTTCTCACTGGTGTCTCAGTTAGTGCATGCTATTATAGTACTAGTTTGAAGACAGTAGCTTGGGCGAT  
TGTTTTCGATTTTTGTGACTTTAGGATTAATTTGGACGCGAAATGATGCATTCAGTTATTACTGTAGTCAAGCGGTTA  
CTTGAGAAATATCACTTGGCGACGCAACCCAGGAATCCGCCAGTTCAGTACTGTTATATCTGCCGTTCCAGAAG  
CTCCAATGCTGAAGCGGAGGAGGCAAGTGTGGGTATCCATTTATAATGGTGTGTGTAATATGCTTAATGT  
GGCTGCTCAAAAACCGAAACAATTTAAAGATTGGGTAAAATTAGCTACTGTAGATTTTAGTAATAATTGTAGAGGT  
AGTAATCAGGTATTTGTGTTTTTTCAAGAATACATTTGAAGTGTGAAGAAAATGTGGGGTTATGTATTTTGTGAGA  
GTAATCCTGCAGCGCGTTTGTGAAAGCTGTGAATGACGAGCCTGAGATTTTGAAGCATGGGTGAAGGAATGTCT  
GTATTTGGATGATCCCAAATTTAGAATGCGTCGAGCGCATGATCAAGAGTATATCGAGCGAGTGTTCGCGGCACAT  
TCATATGGACAAATTTTGTACATGATTTAACTGCTGAAATGAACCAATCACGAAATTTGAGTGTGTTTACACGTG  
TGTATGATCAAATTTCAAATTTGAAGACTGATCTTATGGAAATGGGATCGAATCCATATATAAGGCGTGAATGTTT  
TACGATATGCATGTGTGGTGCATCTGGAATTTGAAAAATCATATTTGACCGATTCTTTATGCAGCGAGCTCTTACGT  
GCGAGTCGTACTCCTGTGACAACAGGCATAAAATGTGTTGTTAATCCATTTATCTGATTATTGGGATCAGTGTGATT  
TTCAGCCTGTTTTGTGCGTTGATGATATGTGGAGTGTGAAACATCTACTACGCTCGATAAGCAGTTGAACATGCT  
TTTCCAGGTCATTCCCTTATCGTGTCTTCTCCTCCTAAAGCTGATTTAGAAGGTAAGAAAATGCGATATAACCCG  
GAAATATTTATATAACAATACGAATAAGCCTTTCCCGAGGTTTGTATCGTATTGCTATGGAAGCTATTTATCGGCGTA  
GAAATGTTTTGATTGAATGTAAGCGAGTGAAGAGAAGAAGCGAGGATGCAAACATTTGTGAGAACGATATTCCTAT  
TGCTGAATGTAGTCTAAGATGTTGAAAGATTTCCATCACATCAAATTTAGGTATGCACATGATGTATGTAATTC  
GAGACCACATGGTCTGAATGGATGACGTATAATGAATTTCTTGAATGGATAACTCCTGTGTATATGGCTAACCGTC  
GTAAGGCGAATGAATCGTTAAGATGCGTGTAGATGAAATGCAAATGTTACGTATGGATGAGCCATTGGAAGGTGA  
TAATATCCTCAATAAGTATGTTGAAGTTAATCAGCGCTTAGTGGAGGAAATGAAGGCATTTAAGGAGCGTACACTA  
TGGTGAGATTTACATCGTTTAGGTGCGGAAGTTAGTGCCTCAGTTAAGAAAGCTTTACCAACTATTTCTATAACTG  
AAAACTACCACATTTGGACTGTTCAATGTGGTATTGCTAAACCTGAGATGGATCATGCTTATGAGGTTATGAGTTC  
GTATGCAGCTGGAATGAATGCAGAGATCGAAGCGCATGAACAAGTTCGGCGTTTATCAGTGGAAATGTCAATATGCA  
GAGCCTCAAGCTCCAAGAAATCCTGATGATGAAGGACCAACCATAGATGAAGAACTTATGGGCGACACTGAATTC  
CATCACAGGCTCTAGAACGTCTTGTGGATGAAGGTTATATAACTGGAAAACAGAAGAAGTATATAGCTACGTGGTG  
TAGTAAGCGTCGTGAACATACTGCTGACTTTGATCTTGTGTGGACTGATAATTTGCGTGTGTTAAGCGCGTATGTG  
CATGAACGTTTCTTCAACTCGGCTTTCTACGGATGACGTCAAGTTATATAAAAACGATTAGCATGTTACATCAA  
AGTACGATAACCACAGAGTGTGCTAAATGTCAACATTTGGTATGCACCGTTGACTGATATCTATGTTGATGACAAGAA  
ATTGTTCTGGTGTGAGAAAGAGAAAAAGACACTTATTGATGTCCGAAAATTTGTCGAAAGAAGATGTGACTGTTCAA  
TCGAAATTTGATTAATTTATCTGTTCTTGTGGTGAAGTATGTATGTTACATTTCAAATATTTTAAATTTATCTTTTCC  
ATAAAGCATGGTTGTTTCGAGAATCCAACCTGGCGCCTAATATATAATGGTACCAAGAAGGGTATGCCTGAGTACTT

TATGAATTGTGTGGATGAAATATCGTTAGATTCCAAATTTGGTAAAGTGAAAGTATGGTTGCAAGCAATCATTGAT  
AAGTATTTAACTCGTCCCGTGAAAATGATTCGTGATTTTCTTTTCAAGTGGTGGCCGCAAGTTGCGTATGTGTTGA  
GCTTGCTAGGTATAAATTGGTATAACTGCGTATGAAATGAGAAATCCGAAACCAACTTCTGAGGAATTAGCTGATCA  
TTATGTGAATAGGCATTGTAGCTCTGATTTTTGGTCACCAGGACTGGCATCACCTCAAGGATTGAAATATAGTGAA  
GCAGTAACAGTAAAGGCACCTAGAATCCATAGATTGCCAGTTACTACTAAGCCTCAGGGATCAACACAACAAGTAG  
ACGCCGCTGTGAATAAAATTTCTACAGAACATGGTTTATATTGGTGTGTTTTCCCAAAGTGCCGGTAGTAAGTG  
GCGAGATATTAATTTTAGGTGTCTTATGCTTCATAATAGGCAATGTTTAAATGTTGAGGCATTATATTGAGTCAACT  
GCCGCTTTTCTGAGGGAACCAAGTACTATTTTAAGTACATTTCATAATCAAGAGACTAGAATGTCTGGTGATATTT  
CTGGTATTGAAATTGATTTGTTGAATTTACCTAGATTGTATTATGGTGGTCTCGCGGGAGAGGAGTCTGTTTGATAG  
CAATATCGTGCTTGTGACTATGCCTAATCGTATTCCTGAGTGTAAAGAGCATTATTAATTTTATAGCGTCACATAAT  
GAGCATATACGTGCTCAGAATGATGGAGTGTAGTAACTGGCGACCATACTCAGCTATTGGCTTTCGAGAATAATA  
ATAAACTCCAATAAGTATTAACGCTGATGGTTTGTATGAGGTTATACTTCAAGGAGTATATACTTATCCATACCA  
CGCGGATGGTGTGTTGTTGTTTCGATATTGTTATCTCGGAATTTACAACGGCCAATTATAGGTATCCATGTTGCTGGT  
ACTGAGGGATTGCATGGTTTTGGAGTCGCTGAACCACTTGTACATGAAATGTTCAACGGTAAAGCGATCGAGAGTG  
AAAGAGAGCCGTATGATCGTGTGTATGAACTTCCGTTGCGTGAATTAGATGAATCTGATATTGGTTTAGATACCGA  
TTTATATCCGATTGGTAGAGTGGATGCAAAGCTAGCTCATGCTCAAAGCCCTTCTACTGGGATTA AAAAGACGCTT  
ATTCATGGAACATTTGATGTAAGGACTGAACCAATCCGATGTATCATCACGTGATCCAAGAATAGCGCCGATGATC  
CTTTGAAAGTTAGGGTGTGAAAAGCATGGCATGCCTTGTTCACCGTTTAAATAGGAAACATCTGGAATTAGCGACAAA  
TCATTTGAAAGAAAAATTAGTTTTCTGTAGTTAAACCAATAAATGGTTGCAAGATTAGAAGTTTGCAAGATGCTGTA  
TGTGGTGTGCCTGGATTAGATGGGTTTGTTCGATATCGTGGAAACTAGTGTGTTTTCTTTGTCTTCATTAA  
AGCCACCTGGAACATCAGGTAAGCGATGGTTGTTTGTATTTGAGCTACAAGACTCGGGATGTTATCTCCTGCGTGG  
AATGCGTCCCGAACCTGAGATTC AATTTATCAACGACACAGTTAATGAGGAAAAAGGGAATAAAACCTCACACTATA  
TTCACGGATTGTTTGAAAGATACTTGTTTGCCTGTTGAAAATGTAGAATACCTGGTAAGACTAGAATATTTAGTA  
TAAGTCCGGTACAGTTTACCATAACCGTTTCGACAGTATTACCTAGACTTTTATGGCATCCTATCGAGCTGCACGACT  
TAATGCTGAGCATGGTATTGGTATTGATGTTAACAGCTTAGAGTGGACAAATTTGGCAACAAGGTTGTCTAAGTAT  
GGCACTCACATCGTGACAGGAGACTATAAGAATTTTGGTCTGGGTTAGATTCCGATGTTGCAGCTTCAGCGTTTG  
AAATTATTATCGACTGGGTATTACATTACACCGAAGAAGATAATAAAGACGAAATGAAGCGAGTAATGTGGACCAT  
GGCGCAAGAGATCTTAGCGCCTAGTCATCTATATCGCGATTTAGTGTACCGAGTACCTTGCGGAATTCATCAGGT  
TCTCCAATAACGGACATATTGAATACAATTTCAAATGTTTTGTTAATTAGGTTAGCTTGGTTAGGTATTACTGATT  
TGCCTTTGTCCGAGTTCTCTCAAATGTTGTTCTTGTCTGTTATGGCGACGATCTTATCATGAATGTTAGCGATAA  
CATGATTGATAAGTTAATGCCGTGACGATAGGAAAATCTTTTTCACAAATAAAGATGGAATTTACGGATCAGGAT  
AAATCAGGAAATACTGTAAAGTGGCGGACGTTACAACTGCTACTTTCTTAAAACATGGGTTCTTAAAACATCCAA  
CTAGACCTGTGTTTTCTAGCTAACCTGGACAAAGTCTCGGTAGAAGGAACGACGAATTTGGACTCATGCTCGAGGATT  
GGGTCGTCGTACAGCAACCATAGAAAATGCTAAACAAGCGTTAGAGTTAGCATTGTTGGTGGGGTCTGAATATTTT  
AATTATGTCAGAAATACCATTAAAATGGCTTTTGACAAGTTGGGTATTTATGAGGACCTTATCACATGGGAAGAAA  
TGGATGTTAGATGTTACGCTAGCGCGTAATATTAATTTTAAATATTCATTAATTTTAAATTTTATTTTAGGTTATT  
GGAATTGAGGGAAGTACCACCCCAAGACCTTCGTTTTAAATCTACTAAGAGGAGTAAACCTATATATAAGAGTC  
TAAAGACAGAGTGGATTAGACCATCATCTTTAGCTTATATATGGGGAAGGTTGAGTTGCCTCTAAAGACTCAGCTC  
CATAGTAGAGTAGTTTTAATTACGATTAAGTGGTACTCTAGGTTAGGTGTTACTCGCGTATTATCAACTAGTGGT  
AATGCGTCCTAATTTTAGTATAGTTTTAACCATAATAGTAAAAA AAAAAAAAAAAAAAAAAAAAAAAAAA

**>DWV-USA-MD-7-cons**

GGCGATTTATGCCTTCCATAGCGAATTACGGTGCAACTAACAATTTTAGATAGTAGCCATGAACAAACATTATAGT  
GGCTCACTACGTATTGATCATTTTTATAATGACTTGCGTAGCATGAAGCGCATGCTTGTAGTTGTAACATATGTTAC  
TTTGCAAGTTGGAGTTTACTATTTTGGATTATGAATATGTGCACTTAGTGTCTGTATTTATAGTCGTTTTGTGGTTC  
AAGGTTTTGTGTTAGTAGTACACTTATGTATGAATGTACCTTTAGTATGAATGTTATAGAATGACAATATCGAAAG  
AAAAATCTTTATAAAAATACAAAATATTGTTTTTATTATTTTCGATATGGTGTTTTATAGAGTAGATTGCCATGTGA  
CCGCTCGTAGAAGTCCATTATGGTTTTATCAATCGAAGTTGAATGTATTTATAAGAATATTATACTTAATTAGTAAT  
ATTAGTAGTCCGTAACATTTATCATCCTTTTTTTCAGTTGATGTGATAATAGACCCTGCAGTATCGAGTAGAGTTT  
CGAATGCGTAGTGCAATAGTACAATCACGTGCACCGACCATCTATTGTAATGATAGATCTGTGCGAAACCATTATT  
TATGAAGTGAAGTACTGCAATCATGGATTAAATTAGATGGTATTCTAGTTTAGAGGTGATTCGGCGCTGCGGTGCGACT  
GAACTTCTAAATTAGCATGTCAGATTGTATTATGAATGCGTTAGTAGTAATTTCTGCGATAGAGCTGGGACCCCT  
CAGTCTCTCAGGATTGTACGAGGCGAAAGTGTGAAAGTTTTGTATGTGTTTTTATATGTACGACTGTATCGGGAA  
TTCCTTTAGCAAGAATCCTTTTAAATACAGTATAATCTGTGCTACGGTACGTTACGTTTCGAGGGCACCCGTTAATG  
TCTCATAGCCAGACGATGGCGGATGGAAAGACATCATATTTTATTTAATGCTGTCTTTATTGCTGATTTATCTT  
GCTGTTTTTATTTGCTATTTTATATTTGCTAATTTTCATTATTGCGAAATATATTACATTGCTATTTTTATTATAT  
ACGCTAGATTCAATTTTATTTTTTCTATATTTTCAATTTAATTTTGATTTTGAAGGTAATATATATAATTAATTA

TTAAAAATGGCCTTTAGTTGTGGAACCTTTTCTTACTCTGCCGTGCCCCAAGCTCCGTCTGTTGCCTATGCACCTC  
GTACATGGGAAGCTGATGAAGCTAGGCGGCCGAGTCATTAAACGTTTGGCGCTGGAGCAAGAACGTATGCGTAA  
CGTTCCTTGACGTTGGCGTCTATGACCAGGCGACATGGGAACAGGAGGACGCGCGGATAATGAGTTCCTAACGGAA  
CAATTAACAATTTATATACTATTTATTCGATCGCTGAACGTTGTACGCGTCGGCCTATTAAGAGCACTCTCCTA  
TATCAGTTTCGAATAGGTTTGTCTCCATTGGAATCCCTCAAGGTGCGAGTCCGGTCAAGAAGCAGGCGAATGTATATT  
TAAGAAACCTAAATATACGCGCGTTTGAAGAAAGTGAAGCGTGTGCAACTCGCTTCGTTTCGTGAAAAAGTTGTT  
CGTCCTATGTGTTCTAGATCTCCTATGCTATTATTTAAGCTTAAGAAAATTATTTATGATTTGCACTTATATAGAT  
TAAGAAAACAGATTAGGATGTTGAGACGTCAAAAACAGCGCGAGTATGAGTTAGAGTGTGTCACTAATCTGTTACA  
ATTATCGAATCCGGTGCAGGCAAAACCAGAGATGGATAACCCTAATCCAGGACCTGATGGCGAGGGTGAAGTTGAA  
TTAGAAAAGGATAGTAATGTTGTTTTAACTCAGCGAGATCCTAGTACATCTATTCAGCGCCGGTGAGCGTAA  
AATGGAGTAGATGGACTAGTAATGATGTAGTAGATGATTACGCCACAATCACATCTCGATGGTATCAGATTGCTGA  
ATTTGTTTTGGTTCGAAGGATGATCCATTTGATAAGGAGTTAGCACGTTTAAATTTTGCCTCGTGCTTTGTTATCTAGT  
ATAGAGGCTAATTCTGATGCTATATGTGATGTGCCAATACTATTCCATTTAAGGTACACGCATATTGGCGAGGCG  
ATATGGAAGTTAGAGTTCAAATTAATTCAAATAAATTCAAAGTTGGTCAATTACAAGCTACTTGGTATTATTTCGGA  
TCATGAGAAATTTGAATATATCGTCTAAGAGAAGCGTTTATGGATTTTCACAAATGGATCATGCTTTGATTAGTGCG  
TCAGCAAGTAATGAAGCAAAATTAGTTATTCCATATAAGCATGTTTATCCATTTTACCAACAAGAATTGTGCCAG  
ATTGGACTACTGGCATTTTAGATATGGGTGCTTTGAACATTCGTGTAATTGCTCCCTTACGGATGAGTGTACTGG  
TCCAACCTACCTGTAATGTCGTGCTGTTTATTAAATTAATAACAGCGAGTTTACAGGGACTTCCCTCTGGTAAAGTTT  
TATGCGAGCCAAATCAGGGCAAAACCTGAGATGGATCGTATATTAATTTAGCAGAAGGATTGTTGAATAACACGA  
TTGGTGGTAATAATATGGATAATCCTTCTTATCAACAATCTCCTCGTCATTTTGTCCCGACTGGTATGCACAGCTT  
AGCTTTAGGTACTAATTTAGTTGAACCATTACATGCATTACGTTTGGATGCAGCCGGTACGACACAACATCCTGTA  
GGTTGTGCTCCTGATGAAGATATGACTGTGTCTTCCATTGCATCTCGATATGGACTAATTAGACGGGTACAATGGA  
AGAAAGATCATGCTAAAGGATCGCTTTTGTTACAATTAGATGCTGATCCATTTGTGGAGCAAAGAATTGAAGGTAC  
GAATCCAATATCTTTGTATTGGTTTCGCACCCCGTGGGTGTAGTATCTAGTATGTTTATGCAATGGCGTGGTTCATTA  
GAATATAGTTTGTATATTATAGCATCCCAATTTCACTACTGGTAGGTTAATTGTAGTTTATGTGCCCGGTTTGACAG  
CATCTTTGCAACTTCAAATGGACTATATGAAATTTGAAGTCATCGAGTTATGTAGTATTTGATTTACAGGAAAGTAA  
TAGCTTCACTTTTGGAGTGCCATATGTTTCAATATAGACCATGGTGGGTGCGTAAATATGGTGGCAATTTATTTGCC  
TCGTCAACTGACGCTCCTAGTACATTATTCATGTATGTGCAGGTTCCGTTGATACCTATGGAAGCTGTTTCAGATA  
CTATTGATATCAATGTGTACGTACGGGGCGGTAGTTCATTTGAAGTTTGTGTTCCAGTCCAACCTAGTTTAGGTTT  
GAATTGGAACACAGACTTTATTTTACGTAATGACGAAGAATACAGGGCTAAGACAGGTTATGCACCATATTATGCT  
GGAGTGTGGCATAGCTTTAATAATAGTAATTTCTCTGTTTTTGGTGGGGATCTGCTTCTGATCAAATTGCTCAGT  
GGCCGACAATTTTCAGTACCAAGAGGTGAGTTAGCTTTCTTACGAATTAAGGATGGAAAGCAAGCTGCTGTAGGAAC  
TCAACCTTGGCGTACGATGGTTGTTTGGCCTTCTGGTTCATGGCTATAATATTGGTATAACCCACGTATAATGCTGAA  
CGAGCTCGCCAGCTTGCACAACACTTATATGGTGGTGGATCATTAACTGATGAGAAGGCCAAACAATTTATTTGTTT  
CTGCTAATCAACAAGGACCTGGTAAGGTAAGTAATGGAATCCGGTATGGGAAGTCATGCGTGCACCATTGTCAAC  
ACAGCGTGCATATGCAAGATTTTGAATTTATTGAGGCTATTCCAGAAGGAGAGGAGTCTCGTAATACTACAGTC  
TTGGATACGACCCTACTTTACAGTCGAGTGGGTTTGGTTCGCGCCTTCTTTGGAGAAGCTTTTAAATGATCTTAAA  
CGTTAATGCGGCGATATCAATTTATATGGTCAATTTATTATTGTCCGTTACTACGGATAAGGATATTGATCATTGTAT  
GTTTACCTTCCCTTGTTTACCACAAGGTTAGCGTTAGACATTGGTTCGTGCTCCTCCACATGAAATCTTTAAT  
AGATGTCGTGATGGTATTATACCATTAATTGCATCTGGATATAGATTTTATAGAGGAGATTTGCGTTATAAGATTG  
TTTTTCCAAGTAATGTTAATAGCAACATTTGGGTACAACATCGACCGGATCGTAGACTGGAAGGATGGTCCGCGGC  
TAAGATTGTAATTTGTGATGCTGTGTCTACTGGTCAAGGGGTGATAATCATGGTTATGCTAGTCACATTCAAATC  
ACGCGTGTAAATAATGTTATAGAATTGGAAGTTCCATTTTATAATGCTACTTGTATAATTATTACAGGCGTTTA  
ATGCGTCTAGCGCTGCATCTAGTTATGCAGTATCTTTAGGAGAAATATCGGTTGGTTTTCAAGCTACAAGTGATGA  
TATTGCATCTATCGTCAACAACCTGTTACTATTTATTATAGTATTGGAGATGGTATGCAGTTTTCTCAGTGGGTT  
GGATATCAACCGATGATGATCCTAGATCAGCTTCTGCACCAGTAGTAAGGGCCGTGCCTGAGGGCCCTATTGCGA  
AGATTA AAAACTTCTTCCATCAAACAGCCGACGAAGTTAGAGAAGCTCAGGCAGCAAAGATGCGTGAAGATATGGG  
TATGGTTGTYCAAGATGTTATTGGAGA ACTTAGCCAGGCCATAACGGATCTTCAACAACCGGAGGTTCAAGCAAAT  
GTCTTCTCAC TGGTGTCTCAGTTAGTGCATGCTATTATAGG TACTAGTTTGAAGACAGTAGCTTGGGCGATTGTTT  
CGATTTTTGTGACTTTAGGATTAATTGGACGCGAAATGATGCATTCAGTTATTACTGTAGTCAAGCGTTACTTGA  
GAAATATCAC TTTGGCGACGCAACCC CAGGAATCCGCCAGTTCAAGTACTGTTATATCTGCCGTTCCAGAAGCTCCC  
AATGCTGAAGCGGAGGAGGCAAGTGTGTTGGGTATCCATTTATTTATAATGGTGTGTGTAATATGCTTAATGTGGCTG  
CTCAAAAACCGAAACAATTTAAAGATTGGGTA AAAATTAGCTACTGTAGATTTTAGTAATAATTGTAGAGGTAGTAA  
TCAGGTATTTGTGTTTTTCAAGAATACATTTGAAGTGTGGAAGAAAATGTGGGGTTATGTATTTTGTGTCAGAGTAAT  
CCTGCAGCGCTTTGTTGAAAGCTGTGAATGACGAGCCTGAGATTTTGAAGCATGGGTGAAGGAATGTCTGTATT  
TGGATGATCCCAAATTTAGAATGCGTCGAGCGCATGATCAAGAGTATATCGAGCGAGTGTTCGCGCACATTCATA  
TGGACAAAATTTGCTACATGATTTAACTGCTGAAATGAACCAATCACGAAATTTGAGTGTGTTTACACGTGTGTAT  
GATCAAATTTCAAATTTGAAGACTGATCTTATGGAAAATGGGATCGAATCCATATAATAAGGCGTGAATGTTTTACGA  
TATGCATGTGTGGTGCATCTGGAATTTGAAAATCATATTTGACCGATTCTTTATGCAGCGAGCTCTTACGTGCGAG

TCGTA CT CCTGTGACAACAGGCATAAAAATGTGTTGTTAATCCATTATCTGATTATTGGGATCAGTGTGATTTTCAG  
CCTGTTTTGTGCGTTGATGATATGTGGAGTGTGAAACATCTACTACGCTCGATAAGCAGTTGAACATGCTTTTCC  
AGGTCCATTTCCCTATCGTGCTTTCTCCTCCTAAAGCTGATTTAGAAGGTAAGAAAATGCGATATAACCCGGAAAT  
ATTTATATAACAATACGAATAAGCCTTTCCCGAGGTTTGATCGTATTGCTATGGAAGCTATTTATCGGCGTAGAAAT  
GTTTTGATTGAATGTAAAGCGAGTGAAGAGAAGAAGCGAGGATGCAAACATTGTGAGAACGATATTCCTATTGCTG  
AATGTAGTCCTAAGATGTTGAAAGATTTCCATCACATCAAATTTAGGTATGCACATGATGTATGTAATTCGGAGAC  
CACATGGTCTGAATGGATGACGTATAATGAATTTCTTGAATGGATAACTCCTGTGTATATGGCTAACCGTCTGTAAG  
GCGAATGAATCGTTTAAAGATGCGTGTAGATGAAATGCAAATGTTACGTATGGATGAGCCATTGGAAGGTGATAATA  
TCCTCAATAAGTATGTTGAAGTTAATCAGCGCTTAGTGGAGGAAATGAAGGCATTTAAGGAGCGTACACTATGGTC  
AGATTTACATCGTTTAGGTGCGGAAATTAGTGCGTCAGTTAAGAAAAGCTTTACCAACTATTTCTATAACCGAAAA  
CTACCACATTTGGACTGTTCAATGTGGTATTGCTAAACCTGAGATGGATCATGCTTATGAGGTTATGAGTTCTGATG  
CAGCTGGAATGAATGCAGAGATTGAAGCGCATGAAACAAGTTCCGGCTTCATCAGTGGAAATGTCAATATGCAGAGCC  
TCAAGCTCCAAGAAATCCTGATGATGAAGGACCAACCATAGATGAAGAACTTATGGGCGACACTGAATTCACATCA  
CAGGCTCTAGAACGTCTTGTGGATGAAGGTTATATAACTGGAAAAACAGAAGAAATATATAGCTACGTGGTGTAGTA  
AGCGTCTGTAACATACTGCTGACTTTGATCCTTGTGTGGACTGATAAATTTGCGTGTGTTAAGCGCGTATGTGCATGA  
ACGTTTCATCTTCAACTCGGCTTTCTACGGATGACGTCAAGTTATATAAAAACGATTAGCATGTTACATCAAAAAGTAT  
GATACCACAGAGTGTGCTAAATGTCAACATTTGGTATGCTCCGTTGACTGATATCTATGTTGATGACAAGAAATTTGT  
TCTGGTGTGAGAAAGAGAAAAAGACACTTATTGATGTCCGAAATTTGTGAAAAGAGATGTGACTGTTCAATCGAA  
ATTTGATTAATTTTATCTGTTCTTGTGGTGAAGTATGTATGTTACATTCAAAATATTTCAATTATCTTTTCCATAAA  
GCATGGTTGTTGAGAACCCAACTTGGCGCCTAATATATAATGGTACCAAGAAGGGTATGCCTGAGTACTTTTATGA  
ATTTGTGTGGATGAAATATCATTAGATTCCAAATTTGGTAAAGTGAAAGTATGGTTGCAAGCGATCATTGATAAGTA  
TTTAACTCGTCCCGTGAAGTATTCGTGATTTTCTTTTCAAGTGGTGGCCGCAAGTTGCGTATGTGTTGAGCTTG  
CTAGGTATAATTTGGTATAACTGCGTATGAAATGAGAAATCCGAAACCAACTTCTGAGGAATTAGCTGATCATTATG  
TGAATAGGCATTGTAGCTCTGATTTTTGGTACCAGGACTGGCATCACCTCAAGGATTGAAATATAGTGAAGCAGT  
AACAGTAAAGGCACCTAGAATCCATAGATTGCCAGTTACTACTAAGCCTCAGGGATCAACACAACAAGTAGACGCT  
GCTGTGAATAAAATTTCTACAGAACATGTTTTATATTGGTGTGTTTTCCCAAAGTGCCTGGTAGTAAGTGGCGAG  
ATATTAATTTTAGGTGTCTTATGCTTCATAATAGGCAATGTTAATGTTGAGGCATTATATTGAGTCAACTGCCGC  
CTTTCTGAGGGAACCAAGTACTATTTAAGTATATTATAATCAAGAGACTAGAATGTCTGGTGTATTTCTGTT  
ATTTGAAATGATTTGTTGAATTTACCTAGATTGTATTATGGTGGTCTCGCGGGAGAGGAGTCTGTTGATAGTAATA  
TCGTGCTTGTGACTATGCCAATCGTATTCCTGAGTGTAAAGAGCATTATTAATTTATAGCGTCACATAATGAGCA  
TATACGTGCTCAGAATGATGGAGTGTAGTAACTGGCGACCATACTCAGCTATTGGCTTTGAGAAATAATAATAAA  
ACTCCAATAAGTATTAACGCTGATGGTTTGTATGAGGTTATACTTCAAGGAGTATATACTTATCCATACCACGGCG  
ATGGTGTGTTGTTGTTGATATTGTTGCTCGGAATTTACAACGGCCAATTATAGGTATCCATGTTGCTGGTACTGA  
AGGATTGCATGGCTTTGGAGTCTGTAACCACCTGTACATGAAATGTTACCGGTAAGCRATCGAGAGTGAAGA  
GAGCCGTATGATCGTGTGTATGAACTTCCGTTGCGTGAATTAGATGAATCTGATATTGGTTTTAGATACCATTAT  
ATCCGATTGGTAGAGTGGATGCAAAGCTAGCTCATGCTCAAAGCCCTTCTACTGGGATTAAGGACGCTTATCCA  
TGGAACATTTGATGTAAGGACTGAACCAAATCCGATGTCATCACGTGATCCAAGAATAGCGCCGCATGATCCTTTG  
AAGTTAGGGTGTGAAAAGCATGGCATGCCTTGTTCACCGTTTAATAGGAAACATCTGGAATTAGCGACAAATCATT  
TGAAAGAAAAATAGTTTCAAGTAAACCAATAAATGGTTGCAAGATTAGAAGTTTGAAGATGCTGTATGTGG  
TGTGCTGATTAGATGGGTTTGAATTCGATATCTTGAATACTAGTGTGTTTCTTTGCTTTCATTAAAGCCA  
CCTGGAACATCAGGTAAGCGATGGTTGTTGACATTGAGCTACAAGACTCGGGATGTTATCTCCTGCGTGGAAATGC  
GTCCCGAATTGAGATTCAATTATCAACGACACAGTTAATGAGGAAAAAGGGAATAAAACCTCACACTATATTCAC  
GGATTGTTTGAAGATACTTGTGCTTGAATAATGTAGAATACCTGGTAAGACTAGAATATTTAGTATAAGT  
CCGGTACAGTTTACCATAACCGTTTTCGACAGTATTACTTAGACTTTATGGCATCCTATCGAGCTGCACGACTTAATG  
CTGAGCATGGTATTGGTATTGATGTTAACAGCTTAGAGTGGACAAAATTTGGCAACAAGGTTGTCTAAGTATGGCAC  
TCACATCGTGACAGGAGACTATAAGAATTTTGGTCTGGGTTAGATTCGGATGTTGCAGCTTCAGCGTTGAAATTT  
ATTATCGACTGGGTATTACATTACACCGAAGAAGATAATAAAGACGAAATGAAGCGAGTAATGTGGACCATGGCGC  
AAGAGATCTTAGCGCCTAGTCATCTATATCGCGATTTGGTGTACCGAGTACCTTGCAGGAAATTCATCAGGTTCTCC  
AATAACGGACATATTGAATACAATTTCAAATTTGTTGTTAATTAGGTTAGCTTGGTTAGGTATTACTGATTTGCCT  
TTGTCCGAGTTCTCTCAAAATGTTGTTCTTGTCTGTTATGGCGACGATCTTATCATGAATGTTAGCGATAACATGA  
TTGATAAGTTTAAACGCCGTGACGATAGGAAAATTTCTTTTCAAAATAAAGATGGAATTTACGGATCAGGATAAATC  
AGGAAATACTGTAAAGTGGCGGACGTTACAGACTGCTACTTTCTTAAACATGGGTTCTTAAACATCCAACCTAGA  
CCTGTGTTTCTAGCTAACCTGGACAAGGTCTCGGTAGAAGGAACGACGAATTTGGACTCATGCTCGAGGATTGGGTC  
GTCGTACAGCAACCATAGAAAATGCTAAACAAGCGTTAGAGTTAGCATTTGGGTGGGGTCTGAATATTTTAAATTA  
TGTCAGAAAATACCATTAATAATGGCTTTTGAACAAGTTGGGTATTTATGAGGACCTTATCACATGGGAAGAAATGGAT  
GTTAGATGTTACGCTAGCGCGTAATATTAATTTTAAATATTCATTAATTTTAAATTTTATTTTAGGTTATTGGAAT  
TGAGGGAAGTACCACCCCAAGACCTTCGTTTTAAATCTACTAAGAGGAGTAAACCTATATATAAGAGTCTAAAG  
ACAGAGTGGATTAGACCATCATCTTTAGCTTATATATGGGGAAGGTTGAGTTGCCCTAAAGACTCAGCTCCATAG

TAGAGTAGTTTTAATTACGATTAAAGTGGTACTCTAGGTTAGGTGTTACTCGCGTATTATCAACTAGTGGTAATGC  
GTCCTAATTTTAGTATAGTTTTAAACCATAATAGTAAAAAAAAAAAAAAAAAAAAAAAAAAAAA

**>DWV-USA-MD-12-cons**

TGGGAGGCGATTTATGCCTTCCATAGCGAATTACGGTGCAACTAACAAATTTTAGATAGTAGCCATGAACAAACATT  
ATAGTGGCTCACTACGTATTGATCATTTTTATAATGACTTGCGTAGCATGAAGCGCATGCTTGTAGTTGTAACAT  
GTTACTTTGCAAGTTGGAGTTTACTATTTTGGATTATGAATATGTGCACTTAGTGTCTGTATTTATAGTCGTTTGT  
GGTTCAAGGTTTTGTGTTAGTAGTACACTTATGTATGAATGTACCTTTAGTATGAATGTTATAGAATGACAATATC  
GAAAGAAAAATCTTTATAAAATACAAAAATATTGTTTTTATTATTTTCGATATGGTGTTTTTATAGAGTAGATTGCCA  
TGTGACCGCTCATAGAAGTCCATTATGGTTTTATCAATCGAAGTTGAATGTACTTATAAGAATGTTATACTTAATCA  
GTATTATTAGTAGTCCGTAACATTTATCATCCTTTTTTCAGTTTGATGTGATAATAGACCCTGCAGTATCGAGTAG  
AGTTTCGAATGCGTAGTGAATAGTACAATCACTGTCACCGACCATCTATTGTAATGATAGATCTGTCGGAAACCA  
TTATTTATGAAGTGAAGTACTAGCAATCATGGATTAATTTAGATGGTATTCTAGTTTAGAGGTGATTTCGGCGCTGCGGTG  
CGACTGAAACTTCTAAATTTAGCATGTCAGATTGTATTATGAATGCGTTAGTAGTAATTTCTGCGATAGAGCTGGGA  
CCCCTCAGTCTCTCAGGTATTGTACGAGGCGAAAGTGTGAAAGTTTTGTATGCGTTTTTATATGTACGACTGTATC  
GGGAATTCCTTTAGCAAGAATCCTTTAATACAGTATAATCTGTGCTACGGTACGTTACGTTTCGCAGGGCACCCGT  
TAATGTCTCATAGCCCAGACGATGGCGGATGGAAAGACATCATATTTTATTTTAAATGCTGTCTTTATTGCTGATTT  
ATCTTGCTGTTTTTATTTGCTATTTTTATATTTGCTAATTTTCATTATTGCGAAATATATTACATTGCTATTTTTAT  
TATATACGCTAGATTCAATTTTTATTTTCTTATATTTTCAATTTAATTTTGATTTTGAAGGTATATATATATAATT  
AATTATTAATAATGGCTTTTAGTTGTGGAACCTTTCTTACTCTGCCGTCGCCAAGCTCCGTCGTTGCTATGC  
ACCTCGTACATGGGAAGCTGATGAAGCTAGGCGGCGCCGAGTTATTAACGTTTGGCGCTGGAGCAAGAACGTATG  
CGTAACGTTCTTGACGTTAGCGTCTATGACCAGGCGACATGGGAACAGGAGGACGCGCGCGATAATGAGTTCCTAA  
CGGAACAATTAACAATTTATATACTATTTATTCGATCGCTGAACGTTGTACGCGTCGGCCTATCAAAGAGCACTC  
TCCTATATCAGTTTTCGAATAGGTTTGGCTCCACTGGAATCCCTCAAGGTCGAGGTCGGTCAAGAAGCAGGCGAATGT  
ATATTTAAGAAACCTAAATATACACGCGTTTGAAGAAAGTGAAGCGTGTGCAACTCGCTTCGTTTCGTGAAAAAG  
TTGTTTCGTCCTATGTGTTCTAGATCTCCTATGCTACTATTTAAGCTTAAGAAAATTTATTTATGATTTGCACTTATA  
TAGATTAAGAAAACAGATTAGGATGTTGAGACGTCAAAAACAGCGCGAATATGAGTTAGAGTGTGTCACTAATCTG  
TTACAATTATCGAATCCGTTGCAGGCAAAACCAGAGATGGATAACCCTAATCCAGGACCTGATGGCGAGGGTGAAG  
TTGAACTAGAAAAGGATAGTAATGTTGTTTTAACAACCTCAGCGAGATCCTAGTACATCTATTCCAGCGCCGGTGAAG  
CGTAAAATGGAGTAGATGGACTAGTAATGATGTAGTAGATGATTACGCCACAATCACATCTCGATGGTATCAGATT  
GCTGAATTTGTTTTGGTGAAGGATGATCCATTTGATAAGGAGTTAGCACGTTTAAATTTGCTCGTCTTTGTTAT  
CTAGTATAGAGGCTAACTCTGATGCTATATGTGATGTGCCTAATACTATCCCATTTAAGGTACACGCATATTGGCG  
AGGCGATATGGAAGTTAGAGTTCAAATTAATTCAAATAAATTCGAAGTTGGTCAATTACAAGCTACTTGGTATTAT  
TCGGATCATGAGAATTTGAATATATCGTCTAAGAGAAGCGTTTATGGATTTTACAAATGGATCATGCTTTGATTA  
GTGCGTCAGCAAGTAATGAAGCAAAATTAGTTATTCCATATAAGCATGTTTATCCATTTTTACCAACAAGAATTGT  
GCCAGATTGGACTACTGGCATTTTAGACATGGGTGCTTTGAATATTCGTGTAATTGCTCCCTTACGGATGAGTGCT  
ACTGGTCCAACCTACCTGTAATGTGCTGCTGTTTTATTAATTAATAACAGCGAGTTTACAGGGACTTCTTCTGGTA  
AGTTTTATGCGAGCCAAATCAGGGCAAAACCTGAGATGGATCGTATATTAATTTAGCAGAGGGATTGTTGAATAA  
CACGATTGGTGGTAATAATATGGATAATCCTTCTTATCAGCAATCTCCTCGTCATTTTGTCCCGACTGGTATGCAT  
AGCTTAGCTTTAGGTACTAATTTAGTTGAACCATTACATGCATTACGTTTGGATGCAGCCGGTACGACACAACATC  
CTGTAGGTTGTGCTCCTGATGAAGATATGACTGTATCTTCCATTGCATCTCGATATGGACTAATTAGACGGGTACA  
ATGGAAGAAAGATCATGCTAAAGGATCACTTTTGTTACAATTAGATGCTGATCCATTTGTGGAGCAAAGAATTGAA  
GGTACGAATCCAATATCTTTGTATTGGTTTCGCACCCGTGGGTGTAGTATCTAGTATGTTTTATGCAATGGCGTGGTT  
CATTAGAATATAGATTTGATATTATAGCATCCCAATTTTCATACTGGTAGGTTAATTTGATAGGTTATGTGCCCGGTTT  
GACAGCATCTTTGCAACTTCAAATGGACTATATGAAATGAAAGTCATCGAGTTATGTAGTATTTGATTTACAGGAA  
AGTAATAGCTTCACTTTTGGAGGTGCCATATGTTTCATATAGACCATGGTGGGTGCGTAAATATGGTGGCAATTATT  
TACCCTCGTCAACTGACGCTCCTAGTACATTTATTTATGTATGTGCAGGTTCCGCTGATACCTATGGAAGCTGTTTC  
AGATACTATTGATATCAATGTGTACGTACGGGGCGGTAGTTTCAATTTGAAGTTTGTGTTCCGGTCCAACCTAGTTTA  
GGTTTGAATTTGGAACACAGACTTTATTTTACGTAATGACGAAGAATACAGGGCTAAGACAGGTTATGCACCATATT  
ATGCTGGAGTGTGGCATAGCTTCAATAATAGTAATCTCTTGTTTTTAGGTGGGGATCTGCTTCTGATCAAATTC  
TCAGTGGCCGACAATTTTCAGTACCAAGAGGTGAGTTAGCTTTCTTACGAATTAAGGATGGAAAGCAAGCTGCTGTA  
GGAACCTCAACCTTGGCGTACGATGGTTGTTTTGGCTTCTGGTTCATGGCTATAATATTTGGTATACTTACGTATAATG  
CTGAACGAGCTCGCCAGCTTGCACAACACTTATATGGTGGTGGATCATTAACCTGATGAGAAGGCCAAACAATTATT  
TGTTCTCTGCTAATCAACAAGGACCTGGTAAGGTAAGTAATGGAATCCGGTATGGGAAGTCATGCGTGCACCATTG  
TCAACACAGCGTGCGCATATGCAAGATTTTGAATTTATTGAAGCTATTCCAGAAGGAGAGGAGTCTCGTAATACTA  
CGGTCTTGGATACGACCACTACTTTACAGTGCAGTGGATTTGGTTCGCGCCTTCTTTGGAGAAGCTTTTAAATGACCT  
TAAAACGTTAATGCGGCGATATCAATTTATATGGTCAATTTATTATTGTCGGTTACTACGGATAAGGATATTGATCAT

TGTATGTTTACCTTCCCTTGTTTACCACAAGGGTTAGCGTTAGACATTGGTTCTGCTGGCTCTCCACATGAAATCT  
TTAATAGATGTCGTGATGGTATTATACCATTAATTGCATCTGGATATAGATTTTATAGAGGAGATTTGCGTTATAA  
GATTGTTTTTCCAAGTAATGTTAATAGCAACATTTGGGTACAACATCGACCGGATCGTAGACTGGAAGGATGGTCC  
GCGGCTAAGATTGTAATTTGCGATGCTGTGTCTACTGGTCAAGGGGTGTATAATCATGGTTATGCTAGTCACATTC  
AAATCACGCGTGTAATAATGTTATAGAATTTGGAAGTTCCATTTTATAATGCTACTTGTATAATTTATTTGCAGGC  
GTTAATGCGTCTAGCGCTGCATCTAGTTATGCAGTATCTTTAGGAGAAATATCGGTTGGTTTTCAAGCTACAAGT  
GATGATATTGCATCTATTGTTAACAAACCTGTTACTATTTATTATAGTATTGGAGATGGTATGCAATTTTCTCAGT  
GGGTTGGATATCAACCGATGATGATCCTAGACCAGCTTCCCTGCACCAGTAGTAAGGGCCGTGCCGTGAGGGCCCTAT  
TGCGAAGATTA AAAACTTCTTCCATCAAACAGCCGACGAAGTTAGAGAAGCTCAGGCAGCGAAGATGCGTGAAGAT  
ATGGGTATGGTTGTCCAAGATGTTATTGGAGA ACTTAGCCAGGCCATACCGGATCTTCAACAACCGGAGGTTCAAG  
CAAATGTCTTCTCACTGGTGTCTCAGTTAGTGCATGCTATTATAGGTA CTAGTTTGAAGACAGTAGCTTGGGCGAT  
TGTTTCGATTTTTGTGACTTTAGGATTAATTGGACGCGAAATGATGCATTCAGTTATTACTGTAGTCAAGCGGTTA  
CTTGAGAAAATATCACTTGGCGACGCAACCCAGGAATCCGCCAGTTCAAGTACTGTTATATCTGCCGTTCCAGAAG  
CTCCCAATGCTGAAGCGGAGGAGGCAAGTGCTTGGGTATCCATTATTTATAATGGTGTGTGTAATATGCTTAATGT  
GGCTGCTCAAAAACCGAAACAATTTAAAAGATTGGGTAAAATTAGCTACTGTAGATTTTAGTAATAATTGTAGAGGT  
AGTAATCAGGTATTTGTATTTTTCAAGAATACATTTGAAGTGTGGAAGAAAATGTGGGGTTATGTATTTTGTGAGA  
GTAATCCTGCAGCGCGTTTTGTTGAAAAGCTGTGAATGACGAGCCTGAGATTTTGAAAGCATGGGTGAAGGAATGTCT  
GTATTTGGATGATCCTAAAATTTAGAATGCGTCGAGCGCATGATCAAGAGTATATCGAGAGAGTGTGTCGGCACAT  
TCGTATGGACAAATTTTGTCTACATGATTTAACTGCTGAAATGAATCAATCACGAAATTTGAGTGTGTTTACACGTG  
TGTATGATCAAATTTCAAATTTGAAGACTGATCTTATGGAAATGGGATCGAATCCATATATAAGGCGCGAATGTTT  
TACGATATGCATGTGTGGTGCATCTGGAATTTGAAAAATCATATTTGACCGATTCTTTATGCAGCGAGCTCTTACGT  
GCGAGTCGTACTCCTGTGACAACAGGCATAAAATGTGTTGTTAATCCATTATCTGATTATTGGGATCAGTGTGATT  
TTCAGCCTGTTTTGTGCGTTGATGATATGTGGAGTGTGAAACATCTACTACGCTCGATAAGCAGTTGAACATGCT  
TTTTCCAGGTCCATTCCCTTATCGTGCTTCTCTCCTCAAAGCTGATTTAGAAGGTAAGAAAATGCGATATAACCCG  
GAAATATTTATATAACAATACGAATAAGCCTTTCCCGAGGTTTTGATCGTATTGCTATGGAAGCTATTTATCGGCCTA  
GAAATGTTTTGATTGAATGTAAGCGAGTGAAGAGAAGAAGCGAGGATGCAAGCATTGTGAGAATGATATTCCTAT  
TGCTGAATGTAGTCCTAAGATGTTGAAAAGATTTCCATCATATCAAATTTAGGTATGCACATGATGTATGTAATTC  
GAGACCACATGGTCTGAATGGATGACGTATAATGAATTTCTCGAATGGATAACTCCTGTGTATATGGCTAACCGTC  
GTAAGGCGAATGAATCGTTTAAGATGCGTGTAGATGAAATGCAAATGTTACGTATGGATGAACCATTGGAAGGTGA  
TAATATTCTCAATAAGTATGTTGAGGTTAATCAGCGTTTTAGTGGAGGAAATGAAGGCATTTAAGGAGCGTACACTA  
TGGTGAGATTTACATCGCGTAGGTGCGGAAATTAGTGCATCAGTTAAGAAAGCTTTACCAACTATTTCTATAACCG  
AAAACTACCACATTTGGACTGTTCAATGTGGTATTGCTAAACCTGAGATGGATCATGCTTATGAGGTTATGAGTTC  
GTATGCAGCTGGAATGAATGCAGAGATTGAAGCGCATGAACAAGTTCGGCGTTTATCAGTGGAAATGTCAATATACA  
GAGCCTCAAGCTCCAAGAAATCCTGATGATGAAGGACCAACTATAGATGAAGAACTTATGGGCGACACTGAATTCA  
CATCACAGGCTCTAGAACGTCTTGTGGATGAAGGTTATATAACTGGA AACAGAAGAAATATATAGCTACGTGGTG  
TAGTAAGCGTCGTGAACATACTGCTGACTTTGATCTTGTGTGGACTGATAATTTGCGTGTGTTAAGCGCGTATGTG  
CACGAACGTTTCTTCAACTCGGCTTCTTACGGATGACGTCAAGTTATATAAAAACGATTAGTATGTTACATCAA  
AGTATGATACCACAGAGTGTGCTAAATGTCAACATTTGGTATGCTCCGTTGACTGACATCTATGTTGATGACAAGAA  
ATTTGTTCTGGTGTGAGAAAGAGAAAAAGACACTTATTGATGTCCGAAAATTTGTCGAAAGAAGATGTGACTGTTCAA  
TCGAAAATTGATTAATTTATCTGTTCCCTTGTGGTGAAGTATGTATGTTACATTTCAAATATTTCAATTATCTTTTCC  
ATAAAGCATGGTTGTTTGAAGAACCCGACTTGGCGCCTAATATATAATGGTACCAAGAAGGGTATGCCTGAGTACTT  
TATGAATTGTGTGGATGAAATATCATTAGATTTCAAATTTGGTAAAGTGAAGATGTTGCAAGCGATCATTGAT  
AAGTATTTAACTCGTCCCGTGA AAAATGATTCTGATTTTTCTTTTCAAGTGGTGGCCGCAAGTTGCGTATGTGTGA  
GCTTGCTAGGTATAATTGGTATAACTGCGTATGAAATGAGAAATCCGAAACCAACTTCTGAGGAATTAGCTGATCA  
TTATGTGAATAGGCATTGTAGCTCTGATTTTTTGGTCACCAGGACTGGCATCACCTCAAGGATTGAAATATAGTGAA  
GCAGTAACAGTAAAGGCACCTAGAATCCATAGATTGCCAGTTACTACTAAGCCTCAGGGATCAACACAACAAGTAG  
ACGCTGCTGTGAATAAAAATTTTACAGAACATGGTTTATATTGGTGTGTTTTTCCAAAAGTACCTGGTAGTAAGTG  
GCGAGATATTAATTTTAGGTGTCTTATGCTTCATAATAGGCAATGTTTAAATGTTGAGGC ACTATATTGAGTCAACT  
GCCGCTTTTCTGAGGGAACCAAGTACTATTTTAAAGTATATTCATAATCAAGAGACTAGAATGTCTGGTGATATTT  
CTGGTATTGAAATTGATTTGTTGAATTTACCTAGATTTGATTTATGGTGGTCTCGCGGGAGAGGAGTCGTTTTGATAG  
TAATATCGTGCTTGTGACTATGCCTAATCGTATTCTGAGTGTAAAGAGCATTATTAATTTTATAGCGTACATAAT  
GAGCATATACGTGCTCAGAATGATGGAGTGTAGTA ACTGGCGACCATACTCAGCTATTGGCTTTCGAGAATAATA  
ATAAACTCCAATAAGTATTAACGCTGATGGTTTTGTATGAGGTTGTACTTCAAGGAGTATATACCTATCCATAACA  
CGGCGATGGTGTGTTTGTGGTTCGATATTGTTGTCTCGAAATTTACAACGGCCGATTATAGGTATCCATGTTGCTGGT  
ACTGAAGGATTCATGGCTTTGGAGTTGCTGAACCACTTGTACATGAAATGTTCACTGGTAAAGCAATCGAGAGTG  
AAAGAGAGCCGTATGATCGTGTGTATGAACTCCGTTGCGTGAATTAGATGAATCTGATATTGGTTTAGATAACCGA  
TTTATATCCGATTGGTTCGAGTGGATGCAAAGCTAGCCCATGCTCAAAGCCCTTCTACTGGGATTA AAAAGACGCTT  
ATCCATGGAACATTTGATGTAAGGACTGAACCAAATCCGATGTATCACGTGATCCAAGAATAGCGCCACATGATC  
CTTTGAAGTTAGGGTGTGAAAAGCATGGCATGCCTTGTTACCGTTTAAATAGGAAACATCTGGAATTAGCGACAAA



TCATTTGAAAGAAAAATTATTTTCAGTAGTTAAACCAATAAATGGTTGCAAGATTAGAAGTTTGCAAGATGCTGTA  
TGTGGTGTGCCTGGATTAGATGGGTTTGATTCGATATCTTGAATACTAGTGCTGGTTTTCTTTGTCTTCATTA  
AGCCACCTGGAACATCAGGCAAGCGATGGTTGTTTGACATTGAGCTACAAGATTCGGGATGTTATCTCCTGCGTGG  
AATGCGTCCCGAACCTTGAGATCAATTATCAACGACACAGTTAATGAGAAAAAGGGAATAAAACCTCACACTATA  
TTCACGGATTGTTTAAAAGATACTTGTTCGCTGTTGAAAAATGTAGAATACCTGGGAAGACTAGAATATTTAGTA  
TAAGTCCGGTACAGTTTACCATACCGTTTCGACAGTATTACTTAGACTTTATGGCATCCTATCGAGCTGCACGGCT  
TAATGCTGAGCATGGTATTGGTATTGATGTTAACAGCTTAGAGTGGACAAATTTGGCAACAAGATTGTCTAAGTAT  
GGCACTCACATCGTGACAGGAGACTATAAGAATTTTGGTCCTGGGTAGATTCCGATGTTGCAGCTTCAGCGTTCCG  
AAATTATTATCGACTGGGTATTACATTACACCGAAGAAGATAATAAAGACGAAATGAAGCGAGTAATGTGGACCAT  
GGCGCAAGAGATCTTAGCGCCTAGTCATCTATGTGCGGACTTGGTGTACCGAGTACCTTGCGGAATTCATCAGGT  
TCTCCAATAACGGACATATTGAATACAATTTCAAATTTGTTTGTAAATTAGGTTAGCTTGGTTAGGTATTACTGATT  
TGCCTTTGTCCGAGTTCTCTCAAAATGTTGTTCTTGTCTGTTATGGCGATGATCTTATCATGAATGTTAGCGACAA  
CATGATTGATAAGTTTAAACGCCGTGACGATAGGAAAAATCTTTTCCAAATATAAGATGGAATTTACGGATCAGGAT  
AAATCAGGAAATACTGTAAAGTGGCGGACGTTACAGACTGCCACTTCTTAAAAACATGGGTTTTTAAAAACATCCAA  
CTAGACCTGTGTTTCTAGCTAACCTGGACAAGGTCTCGGTAGAAGGAACGACGAAATGGACTCATGCTCGAGGATT  
GGTTCGTCGTACAGCAACCATAGAAAAATGCTAAACAAGCGTTAGAGTTAGCATTTGGGTGGGGTCTGAATATTTT  
AATTATGTCAGAAATACCATTAAAAATGGCTTTTTGACAAGTTGGGTATTTATGAGGACCTTATCACATGGGAAGAAA  
TGGATGTTAGATGTTACGCTAGCGCGTAATATTAATTTTAAATATTCATTAATTTTAAATTTTATTTTAGGTTATT  
GGAATTGAGGGAAGTACCACCCCAAGACCTTCGTTTTAAATCTACTAAGAGGAGTAAACCTATATATAAGAGTC  
TAAAGACAGAGTGGATTAGACCATCATCTTTAGCTTATATATGGGAAAGGTTGAGTTGCCTCTAAAGACTCAGCTC  
CATAGTAGAGTAGTTTTAATTACGATTAAGTGGTACTCTAGGTTAGGTGTTACTCGCGTATTATCAATTAGTGGT  
AATGCGTCTAATTTTAGTATAGTTTTAACCATATAAGTAAAAAAGGTTTTTAAAAAAGGTTTTTAAAAAAGGTTTTT

**>DWV-USA-FL-22-cons**

TGGGAGGCGATTTATGCCTTCCATAGCGAATTACGGTGCACCTAACAAATTTTAGATAGTAGCCATGAACAAACATT  
ATAGTGGCTCACTACGTATTGATCATTTTTATAATGACTTGCCTAGCATGAAGCGCATGCTTGTAGTTGTAACAT  
GTTACTTTGCAAGTTGGAGTTTACTATTTTTGGATTATGAATATGTGCACTTAGTGTCTGTATTTATAGTCGTTTGT  
GGTTCAAGTTTTTGTGTTAGTAGTACACTTATGTATGAATGTACCTTTAGTATGAATGTTATAGAATGACAATATC  
GAAAGAAAAATCTTTATAAAATACAAAAATATTGTTTTTATTATTTTCGATATGGTGTTTTTATAGAGTAGATTGCCA  
TGTGACCGCTCGTAGAAGTCCATTATGGTTTTATCAATCGAAGTTGAATGTATTTATAAGAATATTATACTTAATTA  
ATAATATTAGTAGTCCGTAACATTTATCATCCTTTTTTCAGTTTGATGTGATAATAGACCCTGCAGTATCGAGTAG  
AGTTTCGAATGCGTAGTGAATAGTATAATCACTGTCACCGACCATCTATTGTAATGATAGATCTGTCGGAAACCA  
TTATTTATGAAGTACTAGCAATCATGGATTAATCAGATGGTATTTCTAGTTTAGAGGTGATTTCGGCGCTGCGGTG  
CGACTGAACTTCTAAATTAGCATGTCAGATTATATTTATGAATGCGTTAGTAGTAATTTCTGCGATAGAGCTGGGA  
CCCCTCAGTCTCTCAGGTATTGTACGAGGCGAAAGTGTGAAAGTTTTGTATGTGTTTTTATATGTACGACTGTATC  
GGGAATTCCTTTAGCAAGAATCCTTTTAATACAGTATAATTTGTGCTACGGTACGTTACGTTTCGAGGGCACCCGT  
TAATGTCTCATAGCCAGACGATGGCGGATGGAAAGACATCATATTTTATTTTAAATGCTGTCTTTATTGCTGATTT  
ATCTTGCTGTTTTTATTTGCTATTTTCATATTTGCTAATTTTCATTATTGCGAAATATATTACATTGTTATTTTTAT  
TATATACGCTAGATTTCAATTTTTATTTTCTTATATTTTCAATTTAATTTTGAATTTGAAGGTAAATATATATAATT  
AATTATTAATAATGGCTTTTAGTTGTGGAACCTTTCTTACTCTGCCGTCGCCAAGCTCCGTCTGTTGCTGTGC  
ACCTCGTACATGGGAAGCTGATGAAGCTAGGCGGCGCGAGTCATTAAACGTTTGGCGCTGGAGCAAGAACGTATG  
CGTAACGTTCTTGACGTTGGCGTCTATGACCAGGCGACATGGGAACAGGAGGACGCGCGCGATAATGAGTTCCTAA  
CGGAACAATTAACAATTTATATACTATTTATTCGATCGCTGAACGTTGTACGCGTCGACCTATTAAGAGCACTC  
TCCTATATCAGTTTCGAATAGGTTTGTCCATTGGAATCCCTCAAGGTCGAGGTGCGTCAAGAAGCAGGCGAACTT  
ACATTTAAGAAACCTAAATATACGCGGTTTTGCAAGAAAGTGAAGCGTGTGCAACCCGCTTCGTTTCGTGAAAAAG  
TTGTTTCGTCTTATGTGTTCTAGATCTCCTATGCTATTTAAGCTTAAGAAAATTTATTTATGATTTGCACTTATA  
TAGATTAAGAAAACAGATTAGGATTTTGGAGACGTCAAAAACAGCGCGAGTATGAGTTAGAGTGTGTCCTAATCTG  
TTACAATTATCGAATCCGGTGCAGGCAAAACCAGAGATGGATAACCCTAATCCAGGACCTGATGGCGAGGGTGAAG  
TTGAATTAGAAAAGGATAGTAATGTTGTTTTAAACAACCTCAGCGAGATCCTAGTACATCTATTCCAGCGCCGGTGA  
CGTAAAATGGAGTAGATGGACTAGTAATGATGTAGTAGATGATTACGCCACAATCACATCTCGATGGTATCAGATT  
GCTGAATTTGTTTTGGTGCAGGATGATCCATTTGATAAGGAGTTAGCACGTTTAAATTTGCTCGTGTCTTTGTTAT  
CTAGTATAGAGGCTAATTCGATGCTATATGTGATGTGCCTAATACCATTCCATTTAAGGTACACGCATATTGGCG  
AGGCGATATGGAAGTTAGAGTTCAAATTAATTTCAAATAAATTTCAAAGTTGGTCAATTAACAAGCTACTTGGTATTAT  
TCGGATCATGAGAATTTGAATATATCGTCTAAGAGAAGCGTTTTATGGATTTTACAAATGGATCATGCTTTGATTA  
GTGCGTCAGCAAGTAATGAAGCAAAAATGGTTATTCCATATAAGCATGTTTTATCCATTTTTTACCAACAAGAATTGT  
GCCAGATTGGACTACTGGCATTTTAGATATGGGTGCTTTGAACATTCGTGTGATTGCTCCCTTACGGATGAGTGCT  
ACTGGTCCAACCTACCTGTAATGTGCTGCTGTTTTATTAAATTAATAACAGCGAGTTTACAGGGACTTCCCTCTGGTA

AGTTTTATGCGAGCCAAATCAAGGCAAAACCTGAGATGGATCGTATATTAATTTAGCAGAAGGATTGTTGAATAA  
CACGATTGGTGGTAATAATATGGATAATCCTTCTTATCAACAATCTCCTCGTCATTTTGTCCCGACTGGTATGCAC  
AGCTTAGCTTTAGGTACTAATTTAGTTGAACCATTACATGCATTACGTTTGGATGCAGCCGGTACGACACAACATC  
CTGTAGGTTGTGCTCCTGATGAAGATATGACTGTGCTTCCATTGCATCTCGATATGGACTAATTAGACGGGTACA  
ATGGAAGAAAGATCATGCTAAAGGATCGCTTTTGTTACAATTAGATGCTGATCCATTTGTGGAGCAAAGAATTGAA  
GGTACGAATCCAATATCTTTGTATTGGTTTCGCACCCGTGGGTGTAGTATCTAGTATGTTTATGCAATGGCGTGGTT  
CATTAGAATATAGGTTTGTATTTATAGCATCCCAATTTTACTACTGGTAGGTTAATTGTAGGTTATGTGCCCGGTTT  
GACAGCATCTTTGCAACTTCAAATGGACTATATGAAAATTGAAGTCATCGAGTTATGTAGTATTTGATTTACAGGAA  
AGTAATAGCTTCACTTTTGGAGGTGCCATATGTTTCATATAGACCATGGTGGGTGCGTAAATATGGTGGCAATTATT  
TGCCCTCGTCAACTGACGCTCCTAGTACATTATTCATGTATGTGCAGGTTCCGTTGATACCTATGGAAGCTGTTTC  
AGATACTATTGATATCAATGTGTACGTACGGGGCGGTAGTTTCAATTTGAAGTTTGTGTTCCAGTCCAACCTAGTTTA  
GGTTTGAATTGGAACACAGACTTTATTTTACGTAATGACGAAGAATACAGGGCTAAGACAGGTTATGCACCATATT  
ATGCTGGAGTGTGGCATAGCTTTAATAATAGTAATTTCTTGTTTTTAGGTGGGGATCTGCTTCTGATCAAATTC  
TCAGTGGCCGACAATTTCAGTACCAAGAGGTGAGTTAGCTTTTCTTACGAATTAAGGATGGAAAGCAAGCTGCTGTA  
GGAACCTCAACCTTGGCGTACGATGGTTGTTTGGCCTTCTGGTCATGGCTATAATATTTGGTATAACCCACGTATAATG  
CTGAACGAGCTCGCCAGCTTGCACAACACTTATATGGTGGTGGATCATTAAGTATGAGAAGGCCAAACAATTATT  
TGTTCTGCTAATCAACAAGGACCTGGTAAGGTAAGTAATGGAAATCCGGTATGGGAAGTCATGCGTGCACCATTTG  
TCAACACAGCGTGCAGCATATGCAAGATTTTGAATTTATTGAGGCTATTCCAGAAGGAGAGGAGTCTCGTAATACTA  
CAGTCTTGGATACGACTACTACTTTACAGTTCGAGTGGGTTTTGGTTCGCGCCTTCTTTGGAGAAGCTTTTTAATGATCT  
TAAAACGTTAATGCGGCGATATCAATTTATGGTCAATTTATTATTGTCCGTTACTACGGATAAGGATATTGATCAT  
TGTATGTTTACCTTCCCTTGTTTACCACAAGGGTTAGCGTTAGATATTTGGTTCTGCTGGCTCTCCACATGAAATCT  
TTAATAGATGTCGTGATGGTATTATACCATTAATTCATCTGGATATAGATTTTATAGAGGAGATTTGCGTTATAA  
GATTTGTTTTTCCAAGTAATGTTAATAGCAACATTTGGGTACAACATCGACCCGGATCGTAGACTGGAAGGATGGTCC  
CGGGCTAAGATTGTAAATTTGTGATGCTGTGTCTACTGGTCAAGGAGTGTATAATCATGGTTATGCTAGTCACATTC  
AAATCACGCGTGTAAATAATGTTATAGAATTTGGAAGTTCATTTTATAATGCTACTTGTATAAATTTTACAGGC  
GTTTAATGCGTCTAGCGCTGCATCTAGTTATGCAGTATCTTTAGGAGAAATATCGGTTGGTTTTCAAGCTACAAGT  
GATGATATTGCATCTATCGTCAACAAACCTGTTACTATTTATTATAGTATTGGAGATGGTATGCAGTTTTCTCAGT  
GGGTTGGATATCAACCGATGATGATCCTAGATCAGCTTCCCTGCACCAGTAGTAAGGGCCGTGCCCTGAGGGCCCTAT  
TGCGAAGATTAAAACTTCTTCCATCAAACAGCCGACGAAGTTAGAGAAGCTCAGGCAGCAAAGATGCGTGAAGAT  
ATGGGTATGGTTGTTCAAGATGTTATTGGAGAACTTAGCCAGGCCATACCAGGATCTTCAACAACCGGAGGTTCAAG  
CAAATGTCTTCTCACTGGTGTCTCAGTTAGTGCATGCTATTATAGGTACTAGTTTGAAGACAGTAGCTTGGGCGAT  
TGTTTTCGATTTTTGTGACTTTAGGATTAATTGGACGCGAAATGATGCATTCAGTTATTACTGTAGTCAAGCGGTTA  
CTTGAGAAATATCACTTGGCGACGCAACCCAGGAATCCGCCAGTTCAAGTACTGTTATATCTGCCGTTCCAGAAG  
CTCCCAATGCTGAAGCGGAGGAGGCAAGTGTGGGTATCCATTATTTATAATGGTGTGTGTAATATGCTTAATGT  
GGCTGCTCAAAAACCGAAACAATTTAAAGATTGGGTAAAATTAGCTACTGTAGATTTTAGTAATAAATTTAGAGGT  
AGTAATCAGGTATTTGTGTTTTTTCAAGAATACATTTGAAGTGTGGAAGAAGATGTGGGGTTATGTATTTTGTGAGA  
GTAATCCTGCAGCGCGTTTGTAAAAGCTGTGAATGACGAGCCTGAGATTTTGAAGCATGGGTGAAGGAATGTCT  
GTATTTGGATGATCCCAAATTTAGAATGCGTCGAGCGCATGATCAAGAGTATATCGAGCGAGTGTTCGCGGCACAT  
TCATATGGACAAATTTTGTACATGATTTAACTGCTGAAATGAACCAATCACGAAATTTGAGTGTGTTTACACGTG  
TGTATGATCAAATTTCAAAATTTGAAGACTGATCTTATGGAAATGGGATCAAATCCATATATAAGGCGTGAATGTTT  
TACGATATGCATGTGTGGTGCATCTGGAATTTGAAAATCATATTTGACCGATTCTTTATGTAGCGAGCTCTTACGT  
GCGAGTCGTACTCCTGTGACAACGGGCATAAAATGTGTTGTTAATCCATTATCTGATTATTGGGATCAGTGTGATT  
TTCAGCCTGTTTTGTGCGTTGATGATATGTGGAGTGTGAAACATCTACTACGCTCGATAAGCAGTTGAACATGCT  
TTTCCAGGTCATTACCTATCGTGCTTTCTCCTCCTAAAGCTGATTTAGAAGGTAAGAAAATGCGATATAACCCG  
GAAATATTCATATAACAATACGAATAAGCCTTTCCCGAGTTTTGATCGTATTGCTATGGAAGCTATTTATCGGCGTA  
GAAATGTTTTGATTGAATGTAAAGCGAGTGAAGAGAAGAAGCGAGGATGCAAACATTCGCGAGAACGATATTCCTAT  
TGCTGAATGTAGTCTAAGATGTTGAAAGATTTCCATCACATCAAATTTAGGTATGCACATGATGTATGTAATTC  
GAGACCACATGGTCTGAATGGATGACGTATAATGAATTTCTTGAATGGATAACTCCTGTGTATATGGCTAACCGTC  
GTAAGGCGAATGAATCGTTTAAAGATGCGTGTAGATGAAATGCAAATGTTACGTATGGATGAGCCATTGGAAGGTGA  
TAATATCCTCAATAAGTATGTTGAAGTTAATCAGCGCTTAGTGGAGGAAATGAAGGCATTTAAGGAGCGTACATTA  
TGGTGAGATTTACATCGTTTAGGTGCGGAAGTTAGTGCCTCAGTTAAGAAAGCTTTACCAACTATTTCCATAACTG  
AAAACTGCCACATTTGGACTGTTTCGATGTGGTATTGCTAAACCTGAGATGGATCATGCTTATGAGGTTATGAGTTC  
GTATGCAGCTGGAATGAATGCAGAGATCGAAGCGCATGAACAAGTTCGGCGTTTATCAGTGGAAATGTCAATATGCA  
GAGCCTCAAGCTCCAAGAAATCCTGATGATGAAGGACCAACCATAGATGAAGAACTTATGGGCGACACTGAATTC  
CATCGCAGGCTCTAGAACGTCTTGTGGATGAAGGTTATATAACTGGAAAACAGAAGAATATATAGCTACGTGGTG  
TAGTAAGCGTCGTGAACATACTGCTGACTTTGATCTTGTGTGGACTGATAATTTGCGTGTGTTGAGCGCGTATGTG  
CATGAACGTTTCTTCAACTCGGCTTTCTACGGATGACGTCAAGTTATATAAAAACGATTAGTATGTTACATCAA  
AGTATGATACCACAGAGTGTGCTAAATGTCAACATTTGGTATGCTCCGTTGACTGATATCTATGTTGATGACAAGAA  
ATTGTTCTGGTGTGAGAAAGAGAAAAAGACACTTATTGATGTCCGAAAATTTGTCGAAAGAAGATGTGACTGTTCAA

TCGAAATTGATTAATTTATCTGTTCCCTGTAGTGAAGTATGTATGTTACATTCAAAATATTTCAATTATCTTTTCC  
ATAAAGCATGGTTGTTTCGAAAACCCAACCTGGCGCCTAATATATAATGGTACCAAGAAGGGTATGCCTGAGTACTT  
TATGAATTGTGTAGATGAAATATCATTAGATTCCAAATTTGGTAAAGTGAAGTATGGTTGCAAGCGATCATTGAT  
AAGTATTTAACTCGTCCCGTGAAAATGATTTCGTGATTTTCTTTTCAAGTGGTGGCCGCAAGTTGCGTATGTGTTGA  
GCTTGCTAGGTATAAATTGGTATAACTGCGTATGAAATGAGAAATCCGAAACCAACTTCTGAGGAATTAGCTGATCA  
TTATGTGAATAGGCATTGTAGCTCTGATTTTTGGTCCACTGGACTGGCATCACCTCAAGGATTGAAATATAGTGAA  
GCAGTAACAGTAAAGGCACCTAGAATCCATAGATTGCCGGTTACTACTAGGCCTCAAGGATCAACACAACAAGTAG  
ACGCTGCTGTGAATAAAATTTCTACAGAACATGGTTTATATTGGTGTGTTTTCCCAAAGTGCCTGGTAGTAAGTG  
GCGAGATATTAATTTTAGGTGTCTTATGCTTCATAATAGGCAATGTTTAAATGTTGAGGCATTATATCGAGTCAACT  
GCCGCTTTTCCCTGAGGGAACCAAGTACTATTTTAAGTATATTCATAATCAAGAGACTAGAATGTCTGGTGATATTT  
CTGGTATTGAAATTGATTTGTTGAATTTGCCTAGATTGTATTATGGTGGTCTCGCGGGAGAGGAGTCTGTTTGATAG  
TAATATCGTGCTTGTGACTATGCCTAATCGTATTCCTGAGTGTAAAGAGCATTATTAATTTTATAGCGTCACATAAT  
GAACATATACGTGCTCAGAATGATGGAGTGTTAGTAACTGGCGACCATACTCAGCTATTGGCTTTCGAGAACAATA  
ATAAACTCCAATAAGTATTAACGCTGATGGCTTGTATGAGGTTATACTTCAAGGAGTATATACCTACCCATACCA  
CGGCGATGGTGTGTTGTGGTTCGATATTATTGTCTCGGAATTTACAACGGCCAATTATAGGTATCCATGTTGCTGGT  
ACTGAAGGATTCATGGCTTTGGAGTCGCTGAACCACTTGTACATGAAATGTTCAACGGTAAAGCGATTGAGAGTG  
AAAGAGAGCCGTATGATCGTGTGTATGAACTTCCGTTGCGTGAATTAGATGAATCTGATATTGGTTTAGATAACCGA  
TTTATATCCGATTGGTAGAGTGGATGCAAAGCTAGCTCATGCTCAAAGTCTTCTACTGGGATTA AAAAGACGCTT  
ATCCATGGAACATTTGATGTAAGGACTGAACCAATCCGATGTATCATCACGTGATCCGAGAATAGCGCCGCACGATC  
CTTTGAAGTTAGGGTGTGAAAAGCATGGCATGCCTTGTTCACCGTTTAAATAGGAAACATCTGGAATTAGCGACAAA  
TCATTTGAAAGAAAAATTAGTTTTAGTAAACCAATAAATGGTTGCAAGATTAGAAGTTTGCAAGATGCTGTA  
TGTGGTGTGCTGGATTAGATGGGTTGATTCGATATCTTGAATACTAGTGCTGGTTTTCTTTGTCTTCATTAA  
AGCCACCTGGAACATCGGGTAAGCGATGGTTGTTTGACATTGAGCTACAAGACTCGGGATGTTATTTCTGCGTGG  
AATGCGTCCCGAACTTGAGATTC AATTATCAACGACACAGTTAATGAGGAAAAAGGGAATAAAACCTCACACTATA  
TTCACAGATTGTTTGAAAGATACTTGTGTTGCCTGTTGAAAAATGTAGAATACCTGGTAAGACTAGAATATTTAGTA  
TAAGTCCGGTACAGTTCACCATAACCGTTTCGACAGTATTACTTAGACTTTATGGCATCCTATCGAGCTGCACGACT  
TAATGCTGAGCATGGTATTGGTATTGATGTTAACAGCTTAGAGTGGACAAATTTGGCAACAAGGTTGTCTAAGTAT  
GGCACTCACATCGTGACAGGAGACTATAAAAATTTTGGTCCCTGGGTAGATTCCGATGTTGCAGCTTCAGCGTTCCG  
AAATTATTATCGACTGGGTATTACATTACACTGAAGAAGATAATAAAGACGAAATGAAGCGAGTAATGTGGACCAT  
GGCGCAAGAGATCTTAGCGCCTAGTCATCTATACCGCGATTTGGTGTACCGAGTACCTTGC GGAATTCATCAGGT  
TCTCCAATAACGGACATATTGAATACAATTTCAAATGTTTTGTTAATTAGGTTAGCTTGGTTAGGTATTACTGATT  
TGCCTTTGTCCGAGTTCTCTCAAATGTTGTTCTTGTCTGTTATGGCGATGATCTTATCATGAATGTTAGCGATAA  
CATGATTGATAAGTTTAAACGCCGTGACGATAGGAAAATCTTTTTCACAATATAAGATGGAATTTACGGATCAGGAT  
AAATCAGGAAATACTGTAAAGTGGCGGACGTTACAGACTGCTACTTCTTAAAACATGGGTTCTTAAAACATCCAA  
CTAGACCTGTGTTTCTAGCTAACCTGGACAAGGTCTCGGTAGAAGGAACGACGAATTGGACTCATGCTCGAGGATT  
GGTTCGTCGTACAGCAACCATAGAAAATGCTAAACAAGCATTAGAGTTAGCATTG GGTGGGGTCTGAATATTTT  
AATTATGTCAGAAATACCATTAAAATGGCTTTTGACAAGTTGGGTATTTATGAGGACCTTATCACATGGGAAGAAA  
TGGATGTTAGATGTTACGCTAGCGCGTAATATTATATTTTACATAATTCATTAATTTTAAATTTTATTTTAGGTTATT  
GGAATTGAGGGAAGTACCACCCCAAGACCTTCGTTTTAAATCTACTAAGAGGAGTAAACCTATATATAAGAGTC  
TAAAGACAGAGTGGATTAGACCATCATCTTTAGCTTATATATGGGGAAGGTTGAGTTGCCTCTAAAGACTCAGCTC  
CATAGTAGAGTAGTTTTAATTACGATTAAAGTGGTACTCTAGGTTAGGTGTTACTCGCGTATTATCAACTAGTGGT  
AATGCGTCCTAATTTTAGTATAGTTTTAACCATAATAGTAAAAA AAAAAAAAAAAAAAAAAAAAAA

**Supplementary Data S2. DWV, VDV1 and VDV1-DWV recombinant sequences generated by RT-PCR.**

**>VDV1-USA-MD-12-fragm-CP**

TGAGTTAGAGTGTGTTACTAGTTTTGCTACAGCTATCTAATCCTGTTTCAGCTAAACCTGAGATGGACAATCCTAAT  
CCTGGTCCAGATGGTGAAGGTGAAGTTGAATTAGAAAAAGATAGTAATGTAGTATTAACCTACACAACGTGATCCTA  
GTACCTCTATTCCTGCTCCAACCTAGTGTGAAGTGGAGTAGGTGGACTAGTAATGATGTTGTGGATGATTATGCCAC  
TATAACTTCGCGTTGGTATCAGATTGCCGAATTTGTATGGTCAAAGGATGATCCATTTGATAAGGAATTGGCGCGC  
TTAATTTTACCTCGAGCTTTGTTATCTAGTATTGAGGCTAATTCTGACGCTATTTGTGATGTACCTAATACTATTC  
CGTTTAAAGGTACATGCATATTGGCGTGGAGATATGGAAGTTTCGAGTGCAGATTAACCTCGAATAAATTCAGGTTGG  
TCAATTACAGGCAACTTGGTATTATTTCGGATCATGAAAATTTGAATATTCAGACGAAGCGAAGTGTGTATGGTTTT  
TCGCATATGGATCATGCTTTGATTAGTGCATCAGCGAGTAATGAAGCAAATTTAGTGATACCTTTTAAACACGTAT  
ATCCATTCTTACCAACGCGCGTCTGTTCTGATTGGACAACCTGGTATTCCTTGATATGGGTACCTTAAATATTCGTGT  
AATTGCTCCATTACGTATGAGTGCACGGGACCAACCCTTGTAAATGTTGTAGTATTTATTAAGTTAAATAATAGT  
GAATTCACCTGGTACTTCTCTGGTAAGTTTTACGCGAATCAAATCAGGGCAAACCTGAAATGGACCGTGTGTAA  
ATTTGGCAGAAGGATTATTAATAATACTGTAGGTGGTTGTAATATGGATAATCCGTATATCAGCAATCTCCGCG  
TCATTTTGTTCCTACTGGTATGCATAGTTTAGCTTTAGGCTAATTTAGTAGAGCCTTTGCATGCATTACGATTA  
GATGCATCAGGTACAACACAACATCCAGTTGGGTGTGCGCCTGATGAAGATATGACTGTATCTTCCATTGCATCAC  
GATATGGTTTAAAT

**>VDV1-USA-MD-12-fragm-C**

GGTACGGTTATTTCCGCTGTTCCAGAAGCACCCAATGCTGAAGCAGAGGAGGCCAGTGCCTGGGTATCCATTATTT  
ATAATGGTGTGTGTAATATGTTGAATGTAGCCGCTCAAAAACCGAAACAATTTAAAGATTGGGTAAAATTAGCTAC  
CGTAGATTTTAGTAATAATTGTAGAGGTAGTAATCAGGTATTTGTGTTTTTCAAGAATACGTTTGAAGTGTGAAG  
AAAATGTGGGGTTATGTGTTTTGTGTCAGAGTAATCCTGCAGCGGACTCTTGAAAGCAGTGAATGATGAACCTGAGA  
TTTTAAAGCGTGGGTAAAGAATGTCTGTATTTAGATGATCCTAAATTTAGAATGCGACGTGCACATGATCAAGA  
GTATATTGAGAGAGTGTTCGCGCCCATTCGTATGGACAAATTTTATTGCATGACTTAACGGCTGAAATGAATCAA  
TCGCGTAATTTAAGTGTGTTTACGAGAGTGTATGATCAAATATCTAAATTTGAAGACGGATCTCATGGAAATGGGAT  
CAAACCCATATATCAGGCGTGAATGTTTTACGATTTGTATGTGTGGTGCATCTGGAATGGTAAGTCTTATTTAAC  
TGATTCTTTATGCAGCGAGCTCTTACGTGCGAGTCTACTCCAGTGACAACGGGCATTAAGTGTGTTGTGAACCT  
TTGTCTGATTATTGGGATCAGTGTGATTTTCAGCCGTTTTATGTGTTGATGACATGTGGAGTGTGAAACGTCTA  
CTACGCTCGATAAACAGTTAAATATGCTATTTTCAGGTTTCATTCACCAATTGTACTTTACCTCCTAAAGCTGATTT  
AGAAGGTAAGAAAATGCGTTATAATCCTGAAATATTCATATATAATACGAATAAACCTTTTCCGAGGTTTGATCGT  
ATAGCTATGGAAGCTATTTATCGACGTAGAAACGTTTTAATTGAATGTAAGGCTAATGAAGAGAAGAAGCGTGGAT  
GTAACATTTGTGAGAATAATATACCCATTGCTGAATGTAGTCCAAAAATTTTGAAGATTTTCATCACATTAATTT  
TCGTTATGCTCATGATGTGTGCAATTTCTGAAACTACGTGGTCTGAGTGGATGTGATAATGAAATTTTGGAAATGG  
ATTACTCCTGTATATATGGCTAATCGACGTAAAGCAAATGAATCGTTTAAAGATGCGTGTGATGAAATGCAAATGT  
TGCATATAGACGAGCCCTTGGAAAGGCGATAATATTTTAAATAAGTATGTTGAAGTTAATCAGCGCTTAGTTGAGGA  
AATGAAAGCTTT

**>VDV1-USA-FL-22-fragm-C**

CCGCCAATTCAGGTACGGTTATTTCCGCTATTTCCAGAAGCACCCAATGCTGAAGCAGAGGAGGCCAGTGCCTGGGT  
ATCCATTATTTATAATGGTGTGTGTAATATGTTGAATGTAGCCGCTCAAAAACCGAAACAATTTAAAGATTGGGT  
AAATTAGCTACCGTAGATTTTAGTAATAATTGTAGAGGTAGTAATCAGGTATTTGTGTTTTTCAAGAATACGTTT  
AAGTGTGAAGAAAATGTGGGGTTATGTGTTTTGTGTCAGAGTAATCCTGCAGCGGACTCTTGAAAGCAGTGAATGA  
CGAACCTGAGATTTTAAAGCGTGGGTAAAGAATGTCTGTATTTAGATGATCCTAAATTTAGAATGCGACGTGCG  
CATGATCAAGAGTATATTGAGAGAGTGTTCGCGCCCATTCGTATGGACAAATTTTATTGCATGACTTAACGGCTG  
AAATGAATCAATCGCGTAATTTAAGTGTGTTTACGAGAGTGTATGATCAAATATCTAAATTTGAAGACGGATCTCAT  
GGAAATGGGATCAAACCCATATATCAGGCGTGAATGCTTTACGATTTGTATGTGTGGTGCATCTGGAATGGTAAG  
TCTTATTTAACTGATTCTTTATGCAGCGAGCTCTTACGTGCGAGTCTACTCCAGTGACAACGGGCATTAAGTGTG  
TCGTGAACCCTTTGTCTGATTATTGGGATCAGTGTGATTTTCAGCCGTTTTATGTGTTGATGACATGTGGAGTGT  
TGAAACGTCTACTACGCTCGATAAACAGTTAAATATGTTATTTTCAGGTTTCATTCACCAATTGTACTTTACCGCCT  
AAAGCTGATTTAGAAGGTAAGAAAATGCGTTATAATCCTGAAATATTCATATATAATACGAATAAACCTTTTCCGA  
GGTTTGATCGTATAGCTATGGAAGCTATTTATCGACGTAGAAACGTTTTAATTGAATGTAAGGCTAATGAAGAGAA  
GAAGCGTGGATGTAACATTTGTGAGAATAATATACCCATTGCTGAATGTAGTCCAAAAATTTTGAAGATTTTCAT  
CACATTAATTTTCGTTATGCTCATGATGTGTGTAATTTCTGAAACTACGTGGTCTGAGTGGATGTGATAATGACT

TTTTGGAATGGATTACTCCTGTATATATGGCTAATCGACGTAAAGCAAATGAATCGTTTAAAGATGCGTGTTGATGA  
AATGCAAATGTTGCGTATGGATGAGCCCTTGGAAAGGCGATAATATTTTAAATAAGTATGTTGAAGTTAATCAGCGC  
TTAGTTGAGGAAATGAAAGCTTTAAAGAGCGAA

**>VDV1-USA-MD-12-fragm-POL**

GCTTGGAATGGACAACTTGGCAACAAGTCTGTGCGAAATATGGCACGCATATTGTGACAGGAGATTATAAGAAATTT  
TGGTCCTGGGTTAGATTCTGATGTTGCCGCTTCAGCTTTTGAAATTTATCATTGATTGGGTGTTAAATTACACTGAA  
GAAGATGATAAAGACGAAATGAAGCGTGAATGTGGACTATGGCTCAGGAAATCTTAGCTCCTAGTCACTTATGTC  
GTGATTTAGTATATCGCGTGCCATGCGGTATTTCCTTCTGGATCACCGATTACGGACATTTTGAATACTATTTTCGAA  
TTGTTTTGTTAATTCGATTGGCTTGGCAAGGTATTACTGATTTGCCCTTTATCCGAAATTTCTAGACATGTCGTGCTA  
GTTTTGTTACGGTGATGATCTCATCATGAATGTAAGTGATGAGATGATAGATAAAATTCATGCTGTAACAATTGGCG  
ATTTCTTTTCGCGATATAAGATGGAATTTACGGATCAGGATAAGTCTGGAATAACAGTGCAGGTGGCGAACTTTACA  
AACTGCTACGTTTTTTGAAGCATGGGTTCTTGAAACATCCAACAAGACCCGTTTCTAGCCAATCTGGATAAGGTT  
TCTATAGAAGGAACAACCAATTGGACACATGCTCGAGGATTGGGTGCTCGAGTAGCAACCATTGAGAATGCTAAAC  
AAGCGCTAGAGTTGGCATTCCGATGGGGTCCCGAATACTTCAATCATGTTCCGGAATACCATTAAAATGGCATTTCGA  
CAAGTTAGGTATTTATGAGGATCTCATAACGTGGGAAGAAATGGATGTTAGATGTTATGCTAGTGCGTAATTTTAA  
GATTTTAAACTCATTTAAAATTAATTCATATTTAGGTTATTGGAATTGAGGGAAAGTACCACCCCCAAGACCTTCG  
TTTTAAATCTGCTAAGAGGAGTGAACCTGTCATATAAGAGTCTAAAAGCAGAGTGGATTAGACCACCACTTTTAGCT  
TATATGTGAGGAAGGTTGAGTTGCCTCTAAAGACTCAGCTCCGTAGTAGAGTAGTTTTAGTTACGA

**>Rec-VDV1-DWV-USA-MD-12-fragm-C**

GGTACGGTTATTTCCGCTGTTCCAGAAGCACCCAATGCTGAAGCAGAGGAGGCCAGTGCCTGGGTATCCATTATTT  
ATAATGGTGTGTGTAATATGTTGAATGTAGCCGCTCAAAAACCGAAACAATTTAAAGATTGGGTAAAATTAGCTAC  
CGTAGATTTTAGTAATAATTGTAGAGGTAGTAATCAGGTATTTGTGTTTTTCAAGAATACGTTTGAAGTGTTGAAG  
AAAATGTGGGGTTATGTGTTTTGTGTCAGAGTAATCCTGCAGCGGACTCTTGAAAGCAGTGAATGATGAACCTGAGA  
TTTTAAAGCGTGGGTGAAAGAATGTCTGTATTTGGATGATCCTAAATTTAGAATGCGACGTGCACATGATCAAGA  
GTATATTGAGAGAGTGTGTTGCCGCCCATTCGTATGGACAAATTTACTGCATGACTTAACTGCTGAAATGAATCAA  
TCACGAAATTTGAGTGTGTTTACgaGAGTGTATGATCAAATATCTAAATTTGAAGACTGATCTCATGGAAATGGGAT  
CGAATCCATATATCAGGCGTGAATGTTTTACGATATGCATGTGTGGTGCATCTGGAATTGGAAAATCATATTTGAC  
CGATTCTTTATGCAGCGAGCTCTTACGTGCGAGTGCCTCCTGTGACAACAGGCATAAAATGTGTTGTGAATCCA  
TTATCTGATTATTGGGATCAGTGTGATTTTCAGCCTGTTTTGTGCGTTGATGATATGTGGAGTGTTGAAACATCTA  
CTACGCTCGATAAGCAGTTGAATATGCTTTTTCCAGGTCCATTCCCTATTGTGCTTTCTCCTCCTAAAGCTGATTT  
AGAAGGTAAGAAAATGCGATATAACCCGGAATATTCATATAACAATACGAATAAACCTTTCCCGAGGTTTGATCGT  
ATTGCTATGGAAGCTATTTATCGGCGTAGAAATGTTTTGATTGAATGTAAAGCGAGTGAAGAGAAGAAGCGAGGAT  
GCAAGCATTGTGAGAATGATATTCCTATTGCTGAATGTAGTCCCTAAGATGTTGAAAGATTTCCATCATATCAAAT  
TAGGTATGCACATGATGTATGTAATTCGAGACCACATGGTCTGAATGGATGACGTATAATGAATTTCTTGAATGG  
ATAACTCCTGTGTATATGGCTAACCGTCGTAAGGCGAATGAATCGTTTAAAGATGCGTGTAGATGAAATGCAAATGT  
TACGTATGGATGAACCATTTGGAAGGTGATAATATTCTCAATAAGTATGTTGAAGTTAATCAGCGTTTGTAGGGAGGA  
AATGAAGGCATTTAAGGAGCGTACACTATGGTCAGATTTACATCGCGTAGGTGCGGAAATTAGTGCCTCAGTTAAG  
AAAGCTTTACCAACTATTTCTATAACCGAAAACTACCACATTGGACTGTTCAATGTGGTATTGCTAAACCTGAGA  
TGGATCATGCTTATGAGGTTATGAGTTCGTATGCAGCTGGAATGAATGCAGAGA

**>Rec-VDV1-DWV-USA-MD-22-fragm-C**

TTATTTCCGCTATTCCAGAAGCACCCAATGCTGAAGCAGAGGAGGCCAGTGCCTGGGTATCCATTATTTATAATGG  
TGTGTGTAATATGTTGAATGTAGCCGCTCAAAAACCGAAACAATTTAAAGATTGGGTAAAATTAGCTACCGTAGAT  
TTTAGTAATAATTGTAGAGGTAGTAATCAGGTATTTGTGTTTTTCAAGAATACGTTTGAAGTGTTGAAGAAAATGT  
GGGGTTATGTGTTTTGTGTCAGAGTAATCCTGCAGCGGACTCTTGAAAGCTGTGAATGACGAACCTGAGATTTTAAA  
AGCGTGGGTGAAAGAATGTCTGTATTTGGATGATCCCAAATTTAGAATGCGACGAGCGCATGATCAAGAGTATATC  
GAGAGAGTGTGTTGCCGCCCATTCATATGGACAAATTTGCTGCATGACTTAACTGCTGAAATGAACCAATCACGAA  
ATTTGAGTGTGTTTACAAGAGTGTATGATCAAATTTCTAAATTTGAAGACTGATCTTATGGAAATGGGATCAAATCC  
ATATATAAGGCGTGAATGTTTTACGATATGCATGTGTGGTGCATCTGGAATTGGAAAATCATATTTGACCGATTCT  
TTATGCAGCGAGCTCTTACGTGCGAGTGCCTCCTGTGACAACGGGCATAAAATGTGTTGTTAATCCATTATCTG  
ATTATTGGGATCAGTGTGATTTTCAGCCTGTTTTGTGCGTTGATGATATGTGGAGTGTTGAAACATCTACTACGCT  
CGATAAGCAGTTGAACATGCTTTTTCCAGGTTCAATCACCTATCGTGCTTTCTCCTCCTAAAGCTGATTTAGAAGGT  
AAGAAAATGCGATATAACCCGGAATATTCATATAACAATACGAATAAGCCTTTCCCGAGGTTTGATCGTATTGCTA

TGGAAGCTATTTATCGGCGTAGAAATGTTTTGATTGAATGTAAAGCGAGTGAAGAGAAGAAGCGAGGATGCAAACA  
TTGCGGAGAACGATATTCCTATTGCTGAATGTAGTCCTAAGATGTTGAAAGATTTCCATCACATCAAATTTAGGTAT  
GCACATGATGTATGTAATTCGAGACCACATGGTCTGAATGGATGACGTATAATGAATTTCTTGAATGGATAACTC  
CTGTGTATATGGCTAACCGTCGTAAGGCGAATGAATCGTTTAAAGATGCGTGTAGATGAAATGCAAATGTTACGTAT  
GGATGAGCCATTGGAAGGTGATAATATCTCAATAAGTATGTTGAAGTTAATCAGCGTTTAGTGGAGGAAATGAAG  
GCATTTAAGGAGCGTACATTTATGGTCAGATTTACATCGTTTAGGTGCGGAAGTTAGTGCCTCAGTTAAGAAAGCTT  
TACCAACTATTTCCATAACCGAAAACTACCACATTTGGACTGTTCAATGTGGTATTGCTAAACCTGAGATGGATCA  
TGCTTATGAGGTTATGAGTTCGTATG

**>Rec-VDV1-DWV-USA-MD-22-2-fragm-C**

CTGTAGTTAAGCGTTATTAGAAAAATACACTTGGCGACGCAACCCAGGAATCCGCCAATTCAGGTACGGTTAT  
TTCCGCTATTCCAGAAGCACCAATGCTGAAGCAGAGGAGGCCAGTGCCTGGGTATCCATTATTTATAATGGTGTG  
TGATGATGTTGAATGTAGCCGCTCAAAAACCGAAACAATTTAAAGATTGGGTAAAATTAGCTACCGTAGATTTTA  
GTAATAATTGTAGAGGTAGTAATCAGGTATTTGTGTTTTTCAAGAAACGTTTGAAGTGTGAAAGAAATGTGGGG  
TTATGTGTTTTGTTAGAGTAATCCTGCAGCGCGACTCTTGAAAGCAGTGAATGACGAACCTGAGATTTTAAAGCG  
TGGGTTAAAGAATGTCTGTATCTAGATGATCCTAAATTTAGAATGCGACGTGCGCATGATCAAGAGTATATTGAGA  
GAGTGTGTTGCGGCCATTTCGTATGGACAAATTTACTACATGATTTAACTGCTGAAATGAATCAATCACGAAATTT  
GAGTGTGTTTACACGTGTGTATGATCAAATTTCAAAAATGAAGACCGATCTTATGGAATGGGATCGAATCCATAT  
ATAAGGCGTGAATGTTTTACGATATGCATGTGTGGTGCATCTGGAATTTGAAATCATATTTGACCGATTCTTTAT  
GCAGCGAGCTCTTACGTGCGAGTCTACTCCTGTGACAACAGGCATAAAATGTGTTGTTAATCCATTATCTGATTA  
TTGGGATCAGTGTGATTTTCAGCCTGTTTTGTGCGTTGACGATATGTGGAGTGTGAAACATCTACTACGCTCGAT  
AAGCAGTTGAACATGCTTTCCAGGTTCAATCCCTATCGTGCTTTCTCCTCCTAAAGCTGATTTAGAAGGTAAGA  
AAATGCGATATAACCCGGAATATTCATATACAATACGAATAAGCCTTTCCCGAGGTTTGATCGTATTGCTATGGA  
AGCTATTTATCGGCGTAGAAATGTTTTGATTGAATGTAAAGCGAGTGAAGAGAAGAAGCGAGGATGCAAGCATTGT  
GAGAATGATATTCCTATTGCTGAATGTAGTCCTAAGATGTTGAAAGATTTCCATCATATCAAATTTAGGTATGCAC  
ATGATGTATGTAATTCGAGACCACATGGTCTGAATGGATGACGTATAATGAATTTCTTGAATGGATAACTCCTGT  
GTATATGGCTAACCGTCGTAAGGCGAATGAATCGTTTAAAGATGCGTGTAGATGAAATGCAAATGTTACGTATGGAT  
GAACCATTGGAAGGTGATAATATCTCAATAAGTATGTTGAAGTTAATCAGCGTTTAGTGGAGGAAATGAAGGCAT  
TTAAGGAGCGTACGCTATGGTCAGATTTACATCGCTTAGGTGCAGAAGTTAGTGCCTCAGTTAAGAAAGCTTTACC  
AACTATTTCCATAACCGAAAACTACCACACTGGACTGTTCAATGTGGTATTGCTAAACCTGAGATGGATCATGCT  
TATGAGGTTATGAGTTCGTATGCAGCAGGAATGAATGCAGAGATTGAAGCGCATGAACAAGTTGCGGCTTCATCAG  
TGGAATGTCAATATGCAGAGCCTCAAGCTCCAAGAA

**>DWV-USA-MD-12-fragm-C**

CCAGTTCAAGTACTGTTATATCTGCCGTTCCAGAAGCTCCCAATGCTGAAGCGGAGGAGGCAAGTGCCTGGGTATC  
CATTATTTATAATGGTGTGTGTAATATGCTTAATGTGGCTGCTCAAAAACCGAAACAATTTAAAGATTGGGTAAAA  
TTAGCTACTGTAGATTTTAGTAATAATTGTAGAGGTAGTAATCAGGTATTTGTATTTTTCAAGAATACATTTGAAG  
TGTTGAAGAAAATGTGGGTTATGTATTTTGTGTCAGAGTAATCCTGCAGCGCGTTTGTGAAAGCTGTGAATGACGA  
GCCTGAGATTTTGAAGCATGGGTGAAGGAATGTCTGTATTTGGATGATCCTAAATTTAGAATGCGTCGAGCGCAT  
GATCAAGAGTATATCGAGAGAGTGTGTTGCGGCACATTCATATGGACAAATTTTGTACATGATTTAACTGCTGAAA  
TGAATCAATCACGAAATTTGAGTGTGTTTACACGTGTGTATGATCAAATTTCAAAAATGAAGACTGATCTTATGGA  
AATGGGATCGAATCCATATATAAGGCGTGAATGTTTTACGATATGCATGTGTGGTGCATCTGGAATTTGGAAAATCA  
TATTTGACCGATTCTTTATGCAGCGAGCTCTTACGTGCGAGTCGTACTCCTGTGACAACAGGCATAAAATGTGTTG  
TTAATCCATTATCTGATTATTGGGATCAGTGTGATTTTCAGCCTGTTTTGTGCGTTGATGATATGTGGAGTGTGGA  
AACATCTACTACGCTCGATAAGCAGTTGAACATGCTTTTCCAGGTCATTTCCCTATCGTGCTTTCTCCTCCTAAA  
GCTGATTTAGAAGGTAAGAAAATGCGATATAACCCGGAATATTTATATAACAATACGAATAAGCCTTTCCCGAGGT  
TTGATCGTATTGCTATGGAAGCTATTTATCGGCGTAGAAATGTTTTGATTGAATGTAAAGCGAGTGAAGAGAAGAA  
GCGAGGATGCAAGCATTGTGAGAATGATATTCCTATTGCTGAATGTAGTCCTAAGATGTTGAAAGATTTCCATCAT  
ATCAAATTTAGGTATGCACATGATGTATGTAATTCGAGACCACATGGTCTGAATGGATGACGTATAATGAATTTT  
TTGAATGGATAACTCCTGTGTATATGGCTAACCGTCGTAAGGCGAATGAATCGTTTAAAGATGCGTGTAGATGAAAT  
GCAAATGTTACGTATGGATGAACCATTGGAAGGTGATAATACTCAATAAGTATGTTGAAGTTAATCAGCGTTTA  
GTGGAGGAAATGAAGGCATTTAAGGAGCGTACACTATGGTCAGATTTACATCGCGTAGGTGCGGAAATTAGTGCAT  
CAGTTAAGAAAGCTTTACCAACTATTTCTATAACCGAAAACTACCACATTTGGACTGTTCAATGTGGTATTGCTAA  
ACCTGAGATGGATCATGCTTATGAGGTTATGAGTTCGTATGCAGCTGGAATGAATGCAGAGA

**>DWV-USA-FL-22-fragm-C**

CCGCCAGTTCAAGTACTGTTATATCTGCCGTTCCAGAAGCTCCCAATGCTGAAGCGGAGGAGGCAAGTGCTTGGGT  
ATCCATTATTTATAATGGTGTGTGTAATATGCTTAATGTGGCTGCTCAAAAACCGAAACAATTTAAAGATTGGGTA  
AAATTAGCTACTGTAGATTTTAGTAATAATTGTAGAGGTAGTAATCAGGTATTTGTGTTTTTCAAGAATACATTTG  
AAGTGTGAAGAAGATGTGGGGTTATGTATTTTGTTCAGAGTAATCCTGCAGCGCGTTTGTAAAAAGCTGTGAATGA  
CGAGCCTGAGATTTTGAAAGCATGGGTGAAGGAATGTCTGTATTTGGATGATCCCAAATTTAGAATGCGTCGAGCG  
CATGATCAAGAGTATATCGAGCGAGTGTTCGCGCACATTCATATGGACAAATTTTGCTACATGATTTAACTGCTG  
AAATGAACCAATCACGAAATTTGAGTGTGTTTACACGTGTGTATGATCAAATTTCAAATTTGAAGACTGATCTTAT  
GGAAATGGGATCAAATCCATATATAAGGCGTGAATGTTTTACGATATGCATGTGTGGTGCATCTGGAATTGGAAAA  
TCATATTTGACCGATTCTTTATGTAGCGAGCTCTTACGTGCGAGTCGTAATCCTGTGACAACGGGCATAAAATGTG  
TTGTTAATCCATTATCTGATTATTGGGATCAGTGTGATTTTCAGCCTGTTTTGTGCGTTGATGATATGTGGAGTGT  
TGAAACATCTACTACGCTCGATAAGCAGTTGAACATGCTTTTCCAGGTCCATTCACCTATCGTGCTTTCTCCTCCT  
AAAGCTGATTTAGAAGGTAAGAAAATGCGATATAACCCGGAAATATTCATATACAATACGAATAAGCCTTTCCCGA  
GGTTTGATCGTATTGCTATGGAAGCTATTTATCGGCGTAGAAATGTTTTGATTGAATGTAAAGCGAGTGAAGAGAA  
GAAGCGAGGATGCAAACATGCGGAGAACGATATTCCTATTGCTGAATGTAGTCCTAAGATGTTGAAAGATTTCCAT  
CACATCAAATTTAGGTATGCACATGATGTATGTAATTCCGAGACCACATGGTCTGAATGGATGACGTATAATGAAT  
TTCTTGAATGGATAACTCCTGTGTATATGGCTAACCGTCGTAAGGCGAATGAATCGTTTTAAGATGCGTGTAGATGA  
AATGCAAATGTTACGTATGGATGAGCCATTGGAAGGTGATAATATCCTCAATAAGTATGTTGAAAGTTAATCAGCGC  
TTAGTGGAGGAAATGAAGGCATTTAAGGAGCGTACATTATGGTCAGATTTACATCGTTTTAGGTGCGGAAGTTAGTG  
CGTCAGTTAAGAAAGCTTTACCAACTATTTCCATAACTGAAAAACTGCCACATTGGACTGTTTCGATGTGGTATTGC  
TAAACCTGAGATGGATCATGCTTATGAGGTTATGAGTTCGTATGCAGCTGGAATGAATGCAGAGATCGAAGCGCAT  
GAACAG
